# Supplementary material for: Microwave-assisted periselective annulation of triarylphosphenes with aldehydes and ketones
Source: Royal Society of Chemistry journal article supplement (doi:10.1039/d0ob02011g), 2020-01-01

# Microwave-assisted periselective annulation of triphenylphosphenes with aldehydes and ketones

Yun Luo<sup>§</sup>, Zhicheng Fu<sup>§</sup>, Xingyang Fu, Changle Du and Jiayi Xu\*

*State Key Laboratory of Chemical Engineering Resource, College of Chemistry,  
Beijing University of Chemical Technology, Beijing 100029, P. R. China.*

*E-mail: [jxxu@mail.buct.edu.cn](mailto:jxxu@mail.buct.edu.cn)*

## Electronic Supplementary Information

### Contents

1. Copies of <sup>1</sup>H, <sup>13</sup>C, <sup>31</sup>P and <sup>19</sup>F NMR spectra of compounds 3, 5, and 4. ....S2

# 1. Copies of $^1\text{H}$ , $^{13}\text{C}$ , $^{31}\text{P}$ and $^{19}\text{F}$ NMR spectra of compounds 3 and 4.

$^1\text{H}$ ,  $^{31}\text{P}$  and  $^{13}\text{C}$  NMR spectra of compound 3a in  $\text{CDCl}_3$  (400 MHz)

7.51  
7.50  
7.49  
7.48  
7.46  
7.45  
7.44  
7.43  
7.43  
7.35  
7.33  
7.33  
7.32  
7.32  
7.30  
7.30  
7.27  
7.26  
7.26  
7.25  
7.24  
7.23  
7.22  
7.21  
7.19  
7.17  
7.17  
7.16  
7.15  
7.13  
7.12  
7.10  
7.10  
6.86  
6.86  
6.84  
6.79  
6.77  
6.74  
6.73  
4.83  
4.77

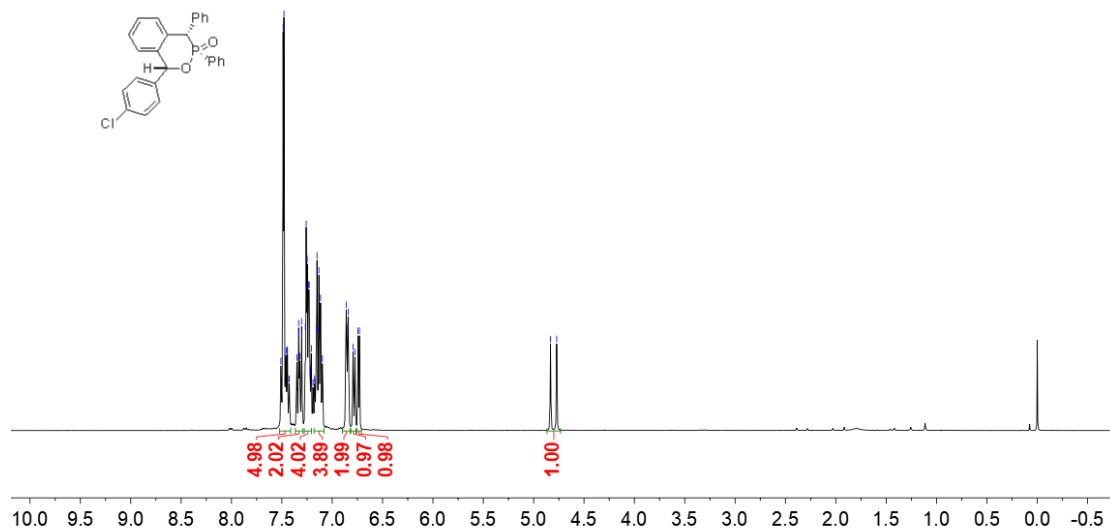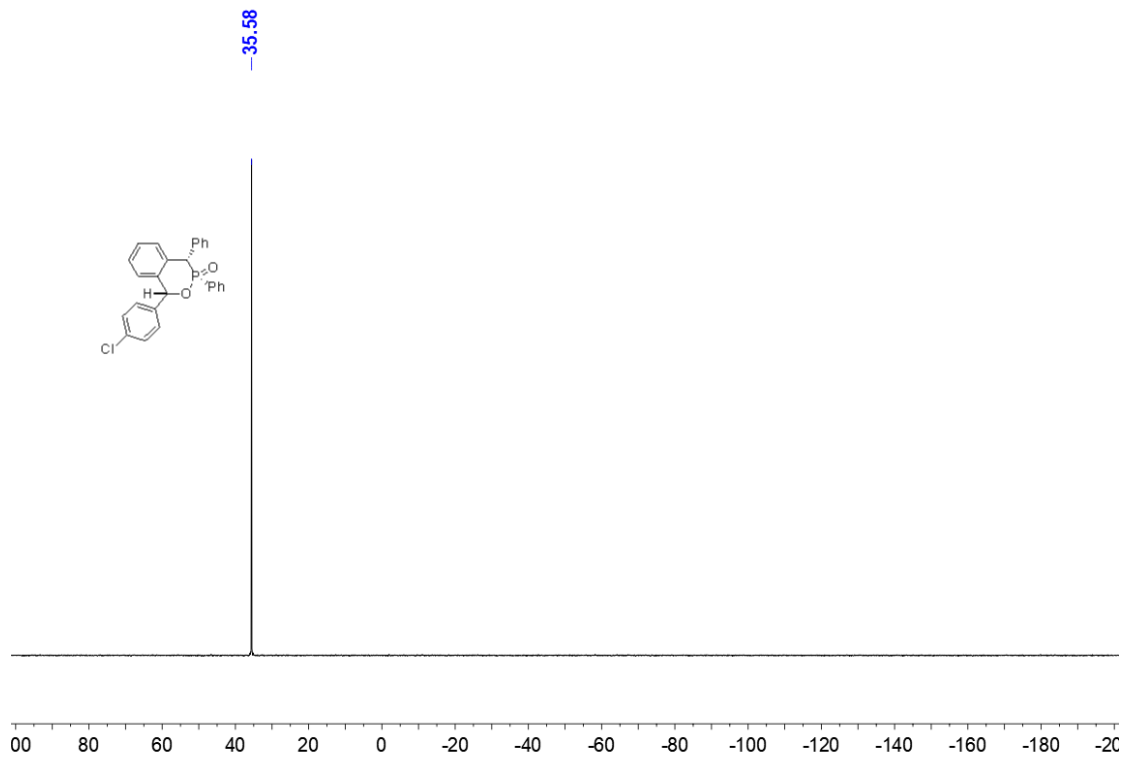

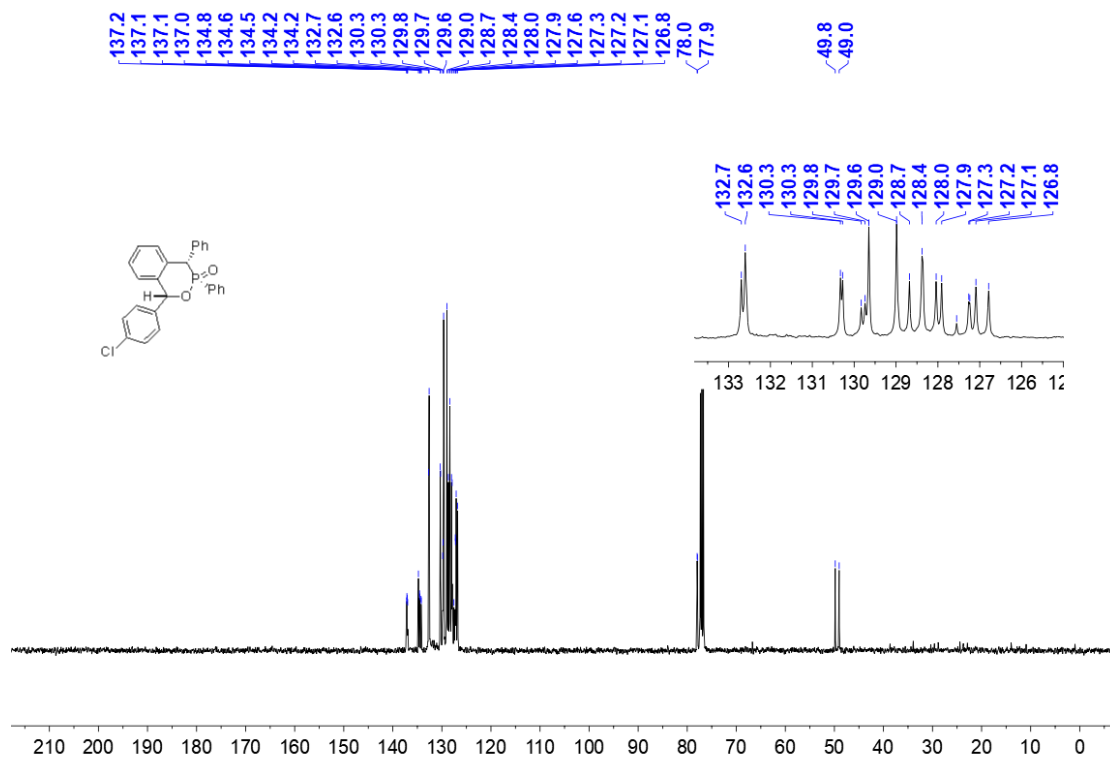

<sup>1</sup>H, <sup>31</sup>P and <sup>13</sup>C NMR spectra of compound **3b** in CDCl<sub>3</sub> (400 MHz)

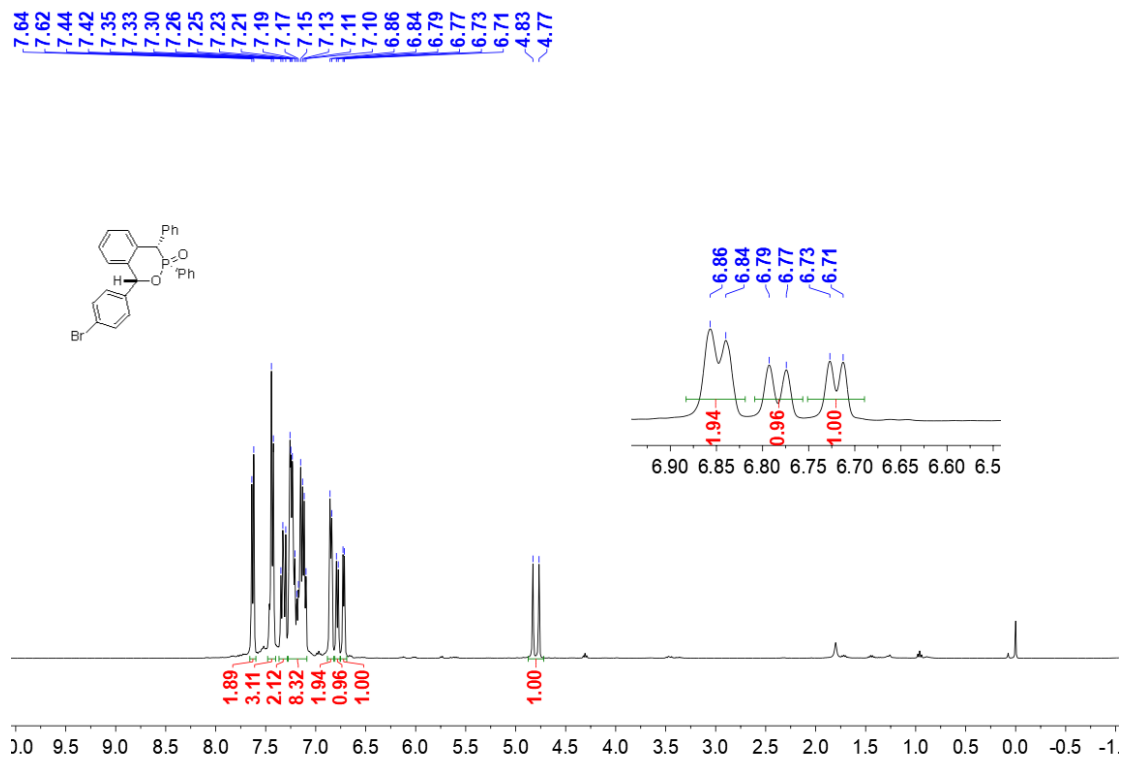

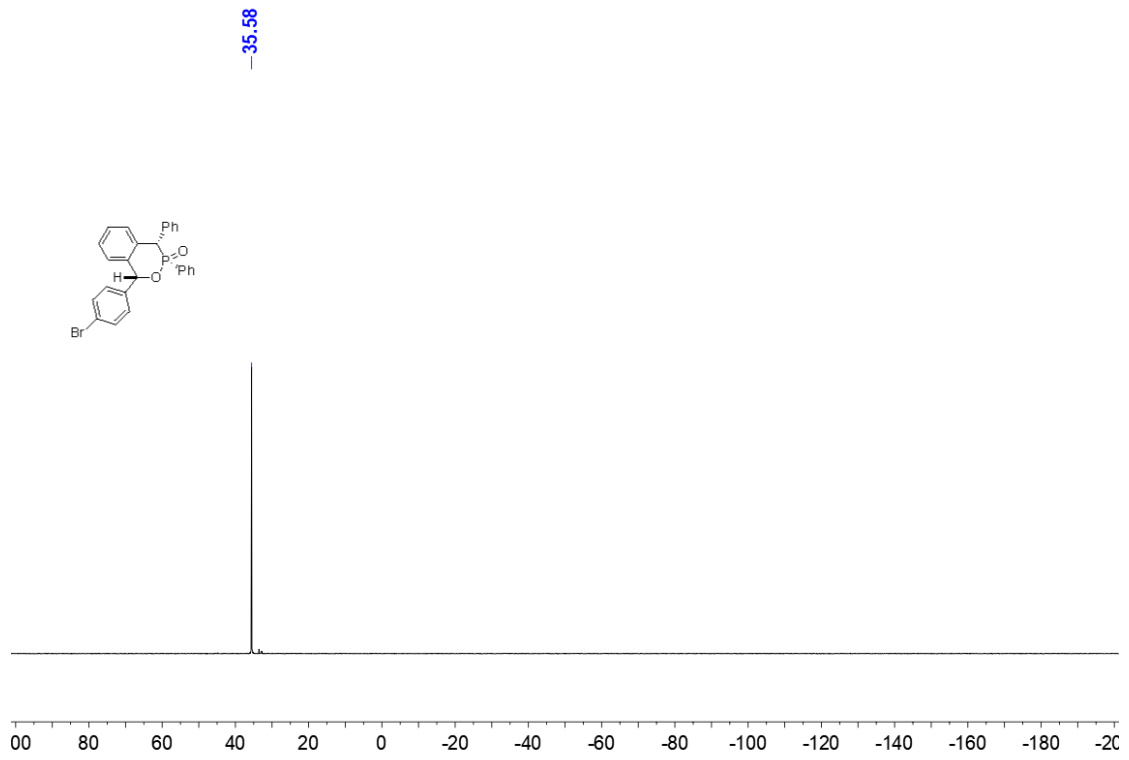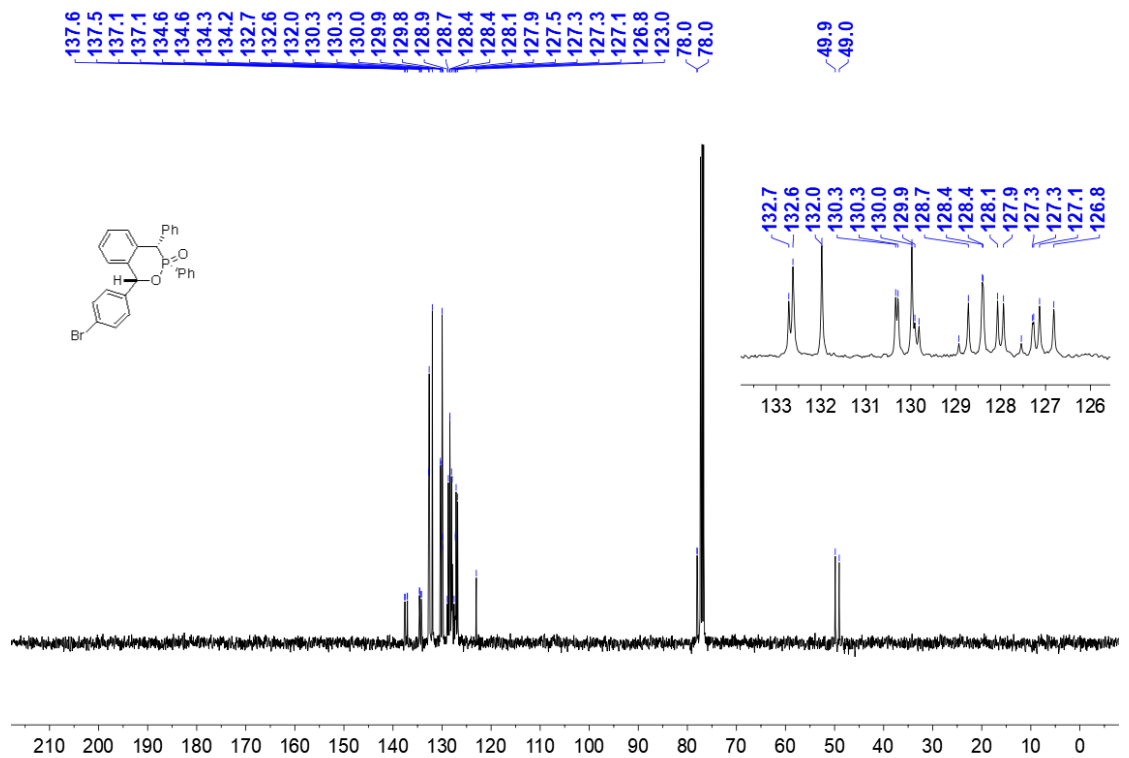

$^1\text{H}$ ,  $^{31}\text{P}$ ,  $^{19}\text{F}$  and  $^{13}\text{C}$  NMR spectra of compound **3c** in  $\text{CDCl}_3$  (400 MHz)

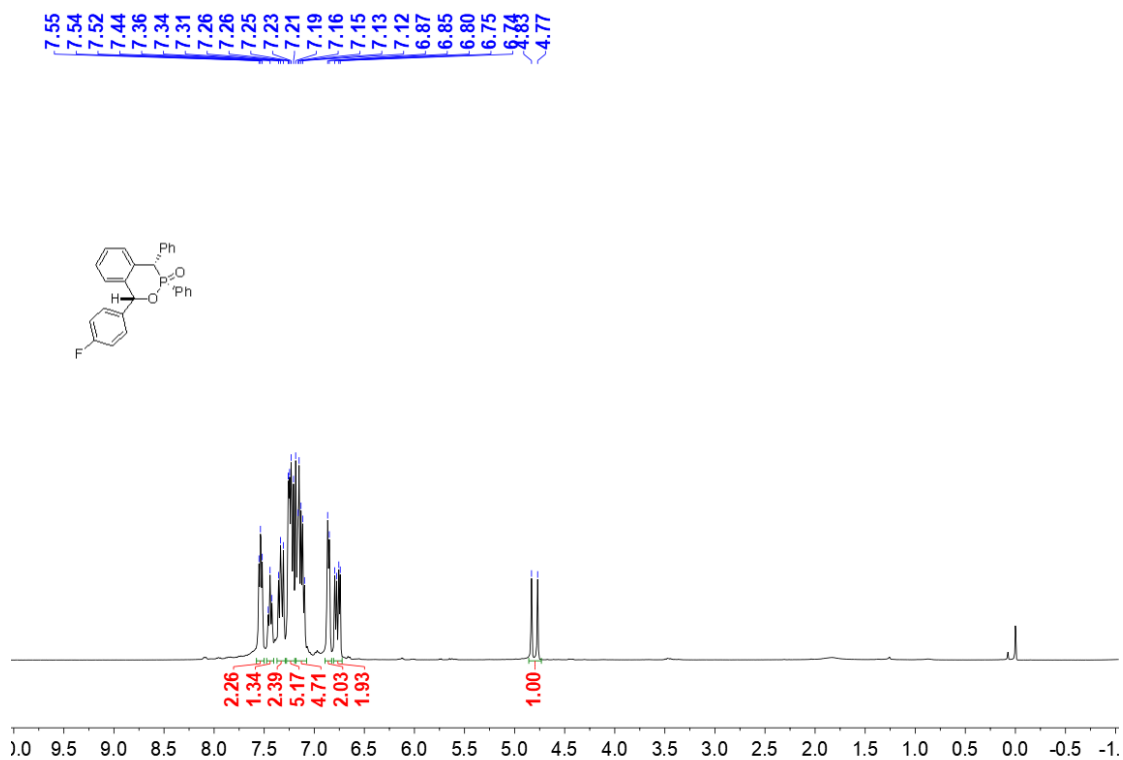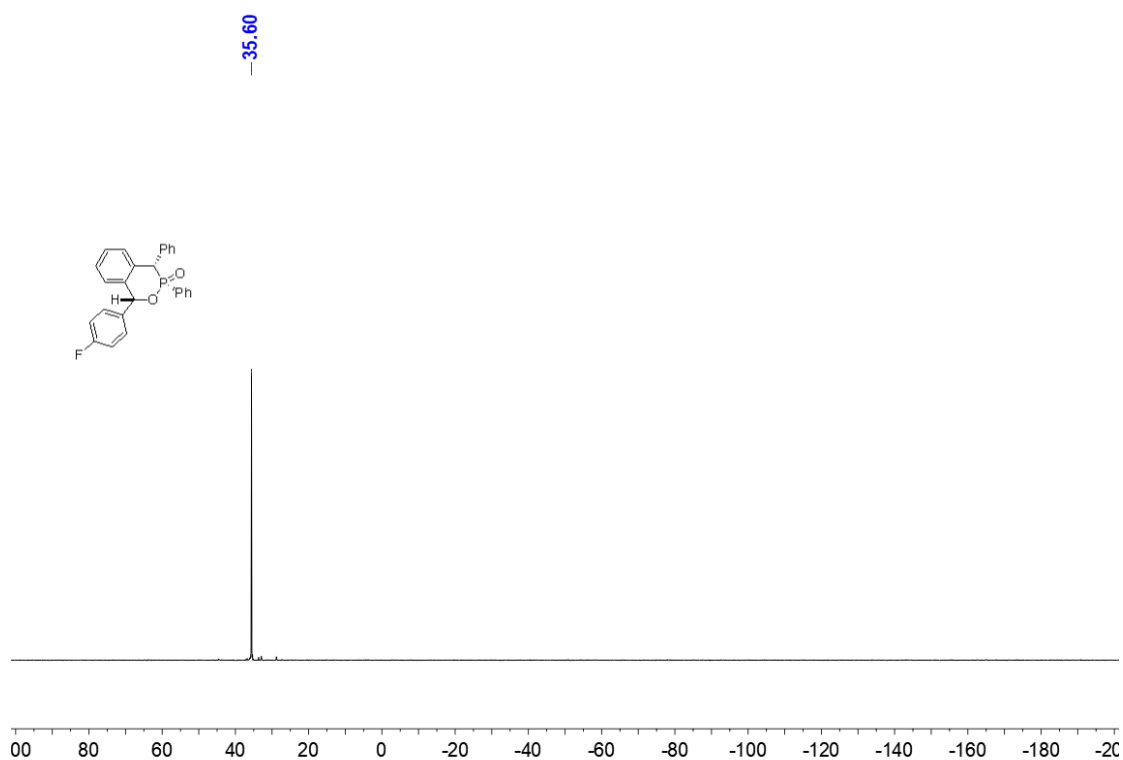

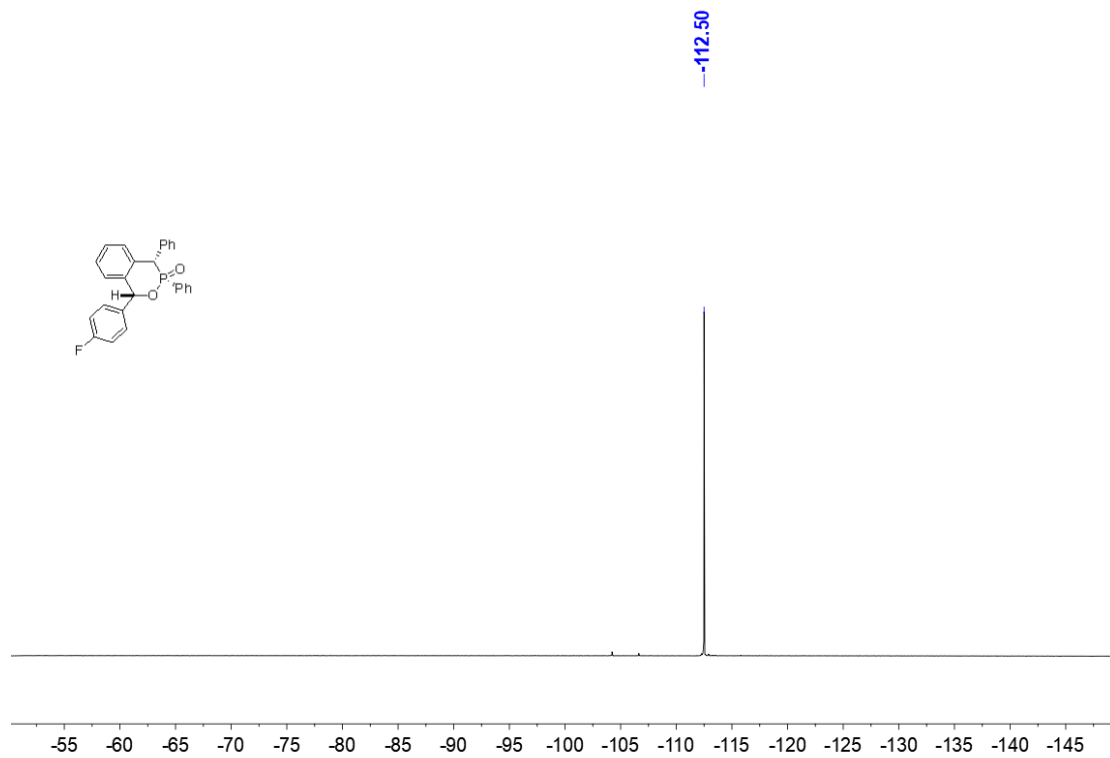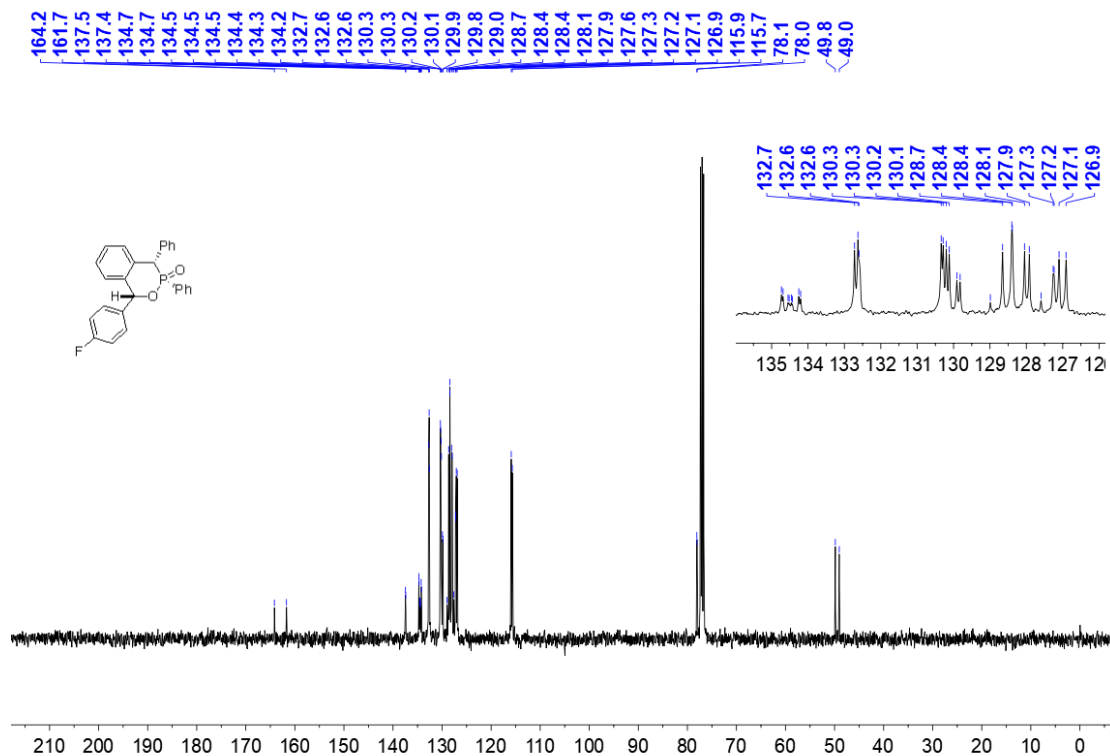

$^1\text{H}$ ,  $^{31}\text{P}$  and  $^{13}\text{C}$  NMR spectra of compound **3d** in  $\text{CDCl}_3$  (400 MHz)

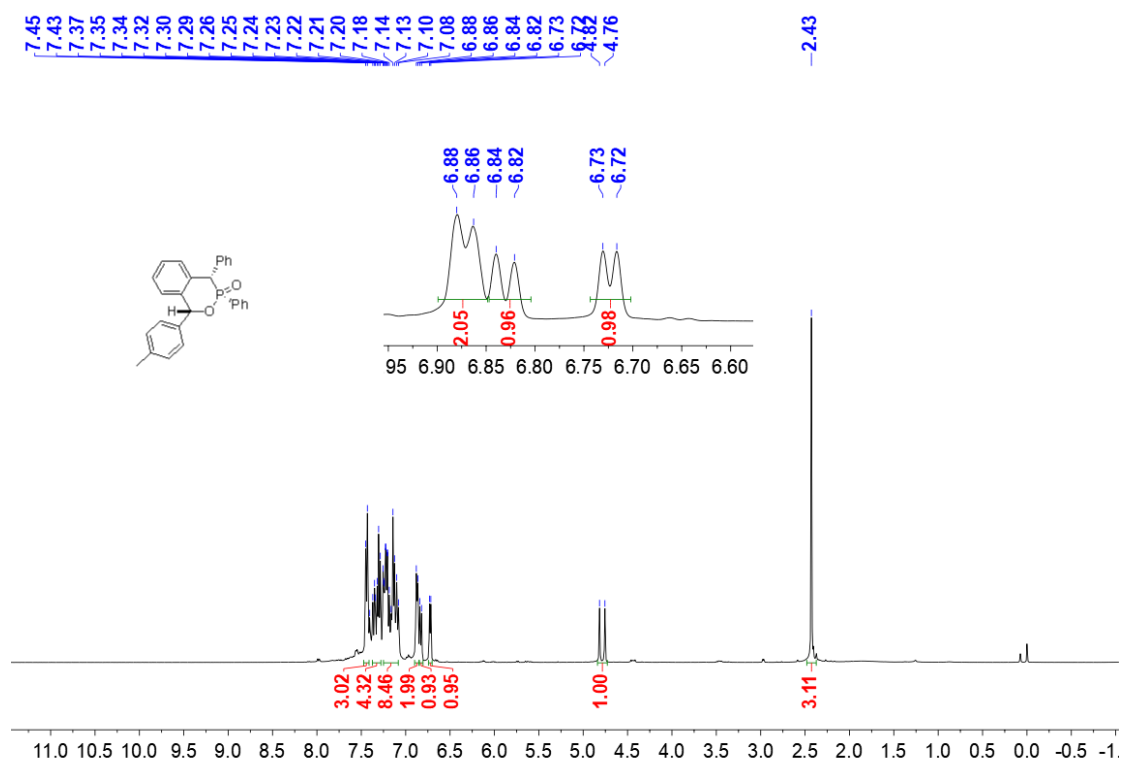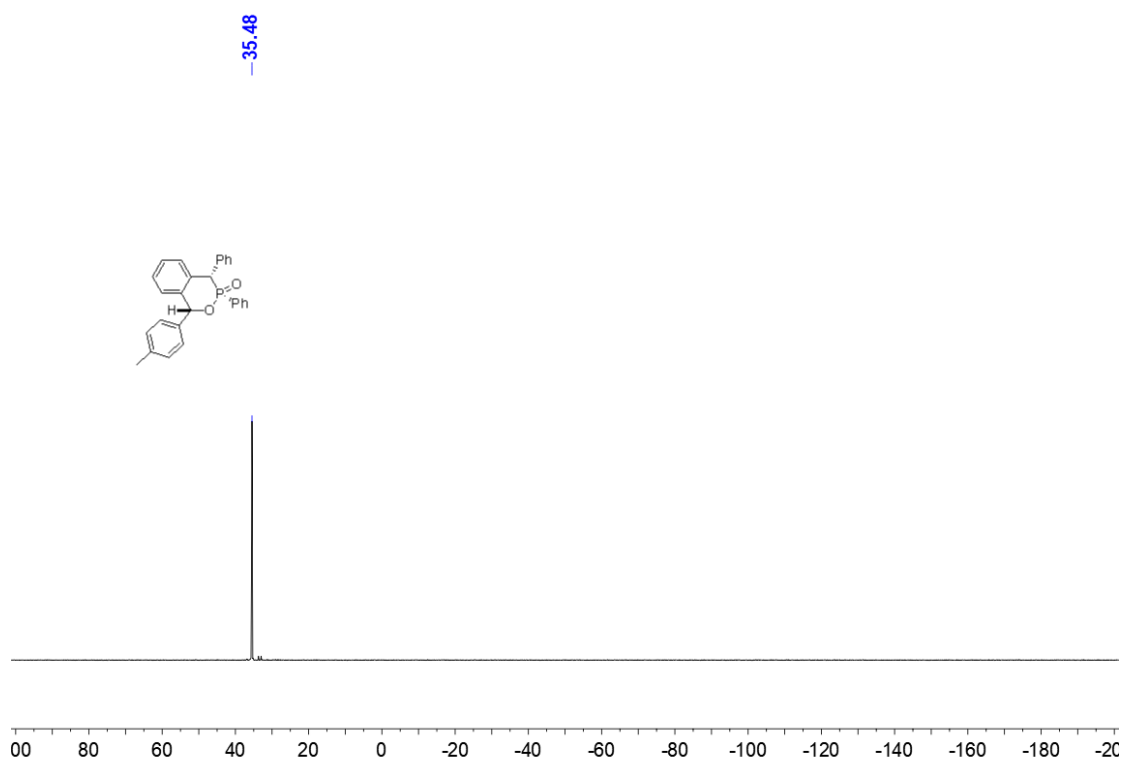

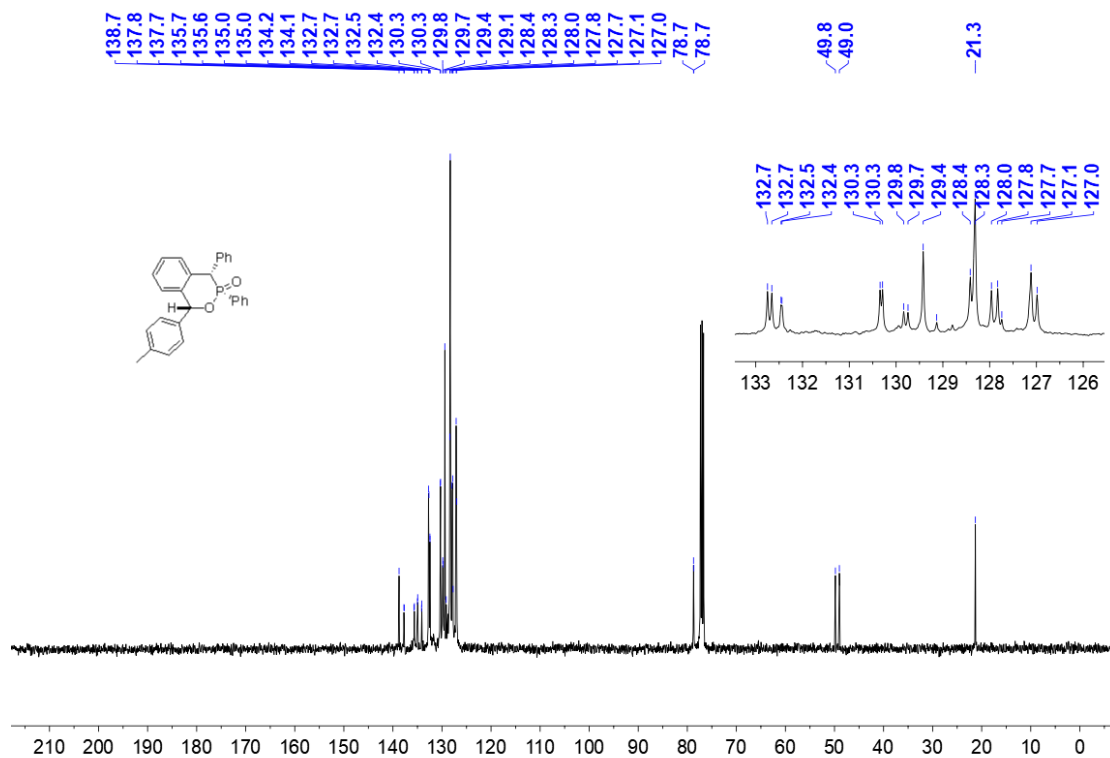

**<sup>1</sup>H, <sup>31</sup>P and <sup>13</sup>C NMR spectra of compound 3e in CDCl<sub>3</sub> (400 MHz)**

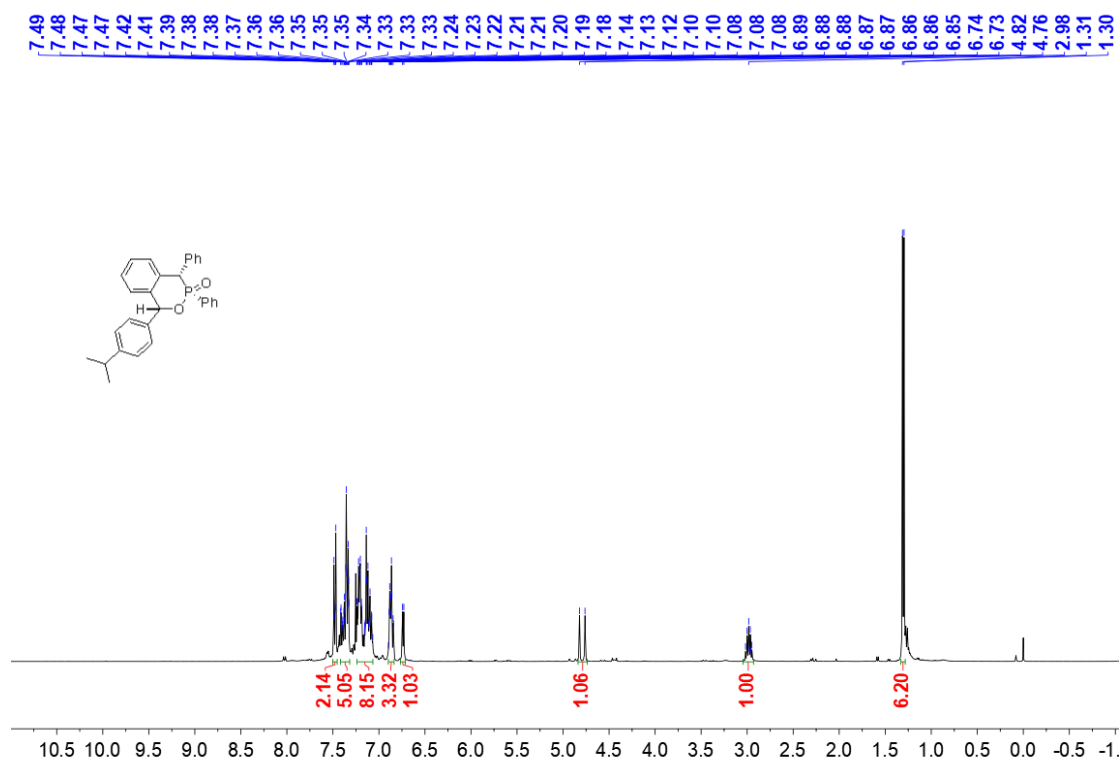



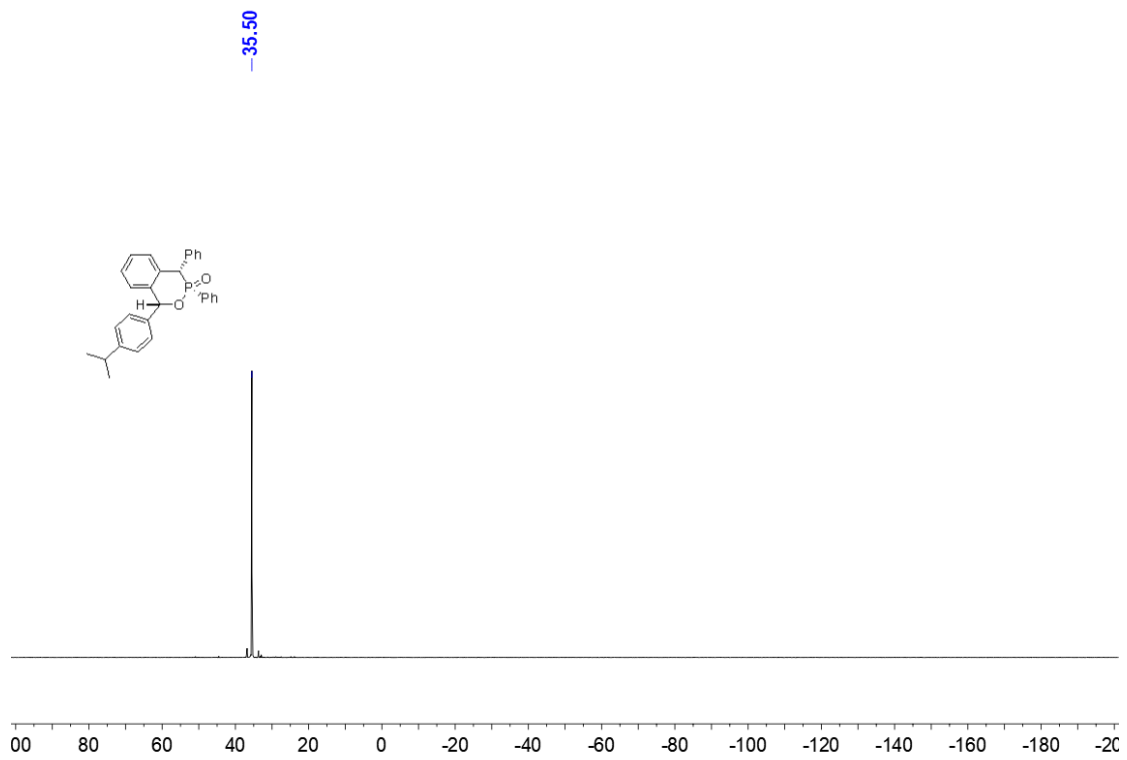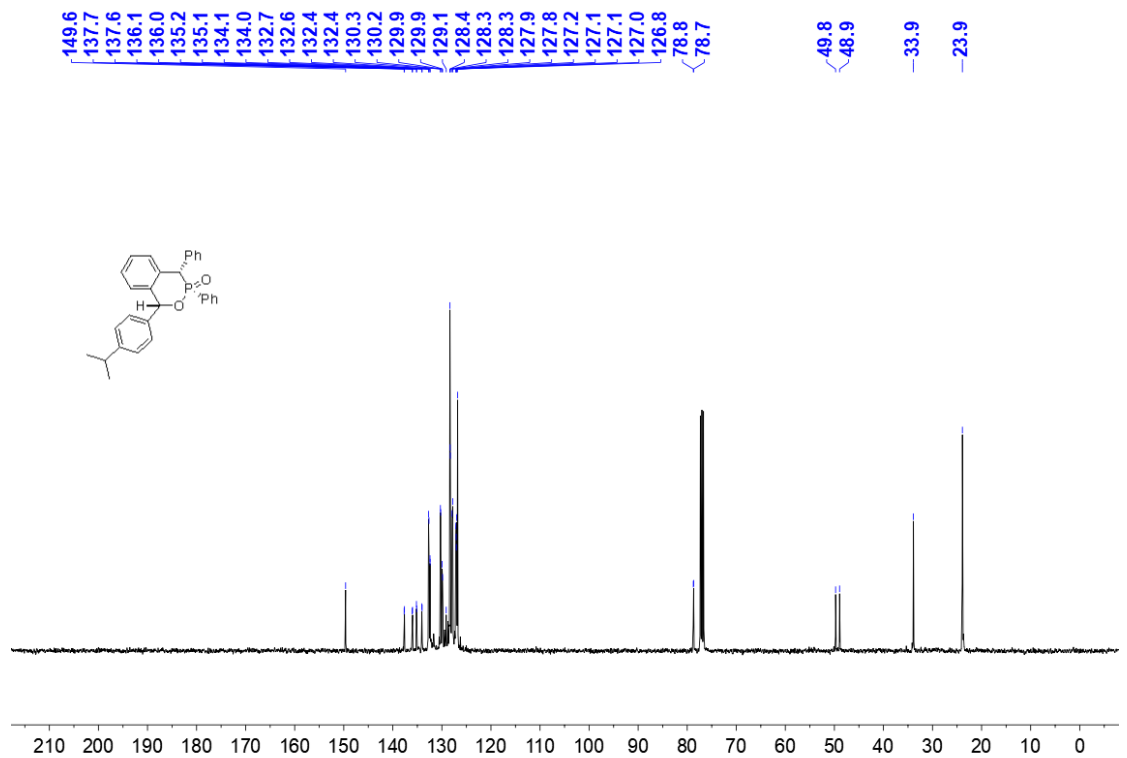

$^1\text{H}$  and  $^{31}\text{P}$  NMR spectra of compound **3f** in  $\text{CDCl}_3$  (400 MHz)

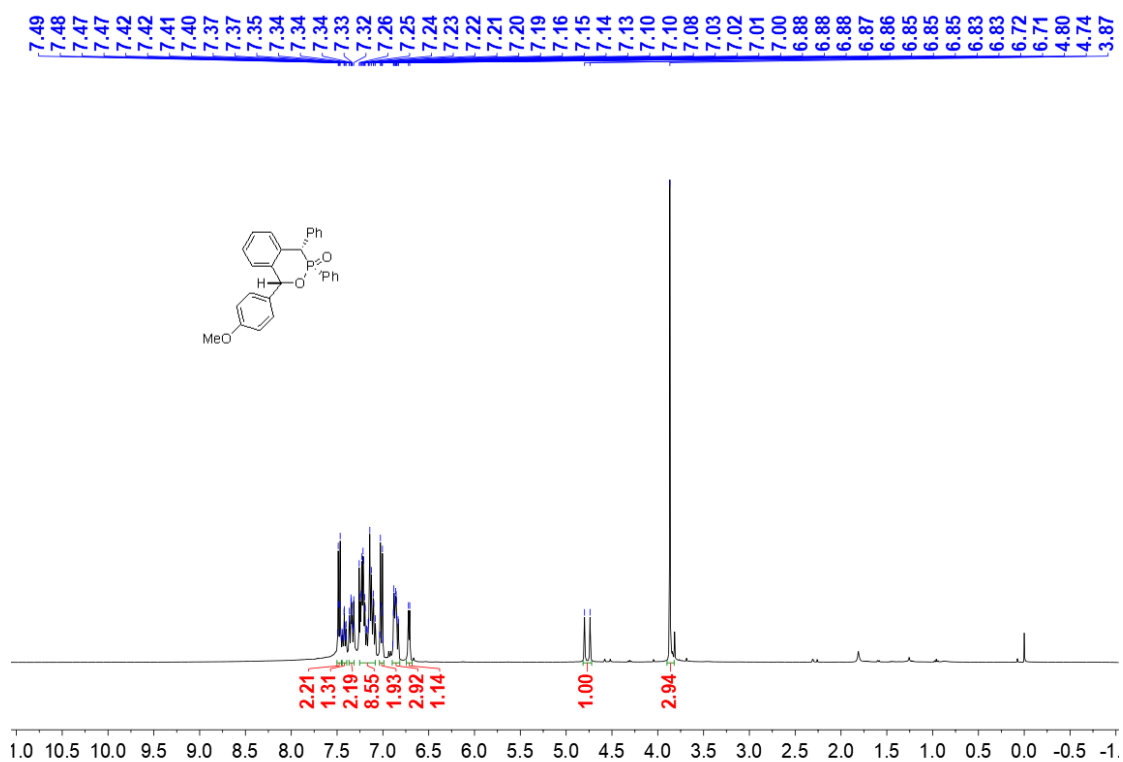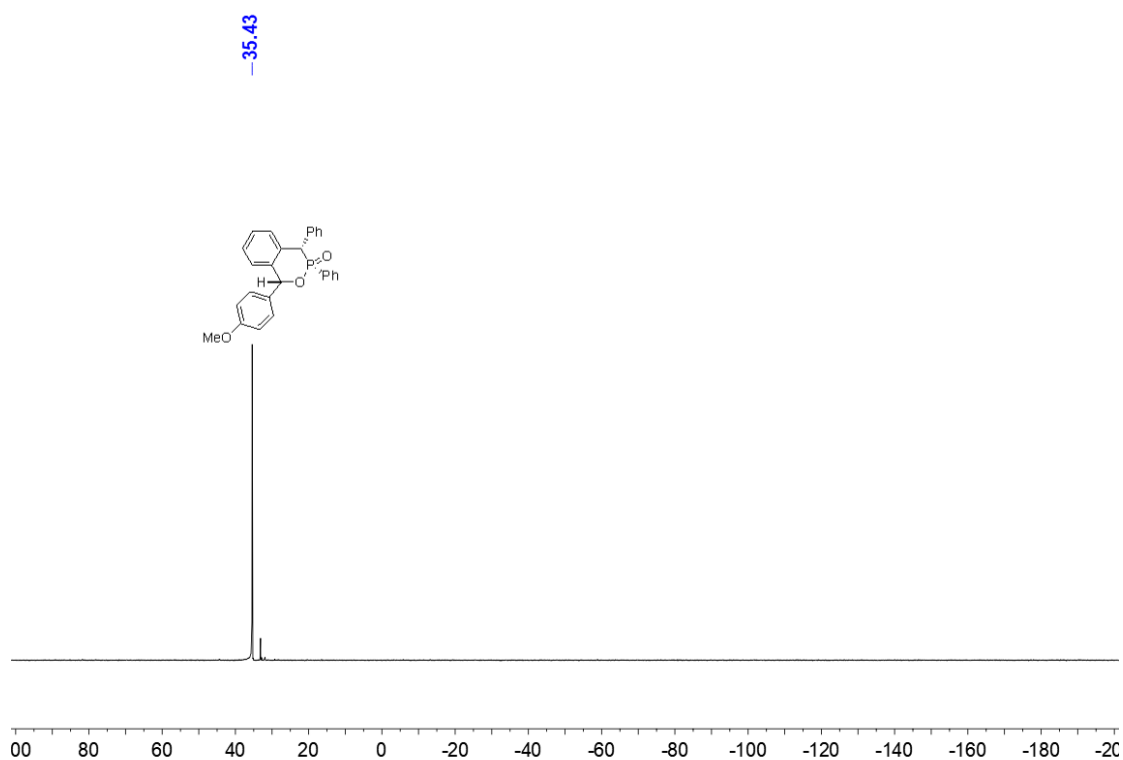

$^1\text{H}$ ,  $^{31}\text{P}$  and  $^{13}\text{C}$  NMR spectra of compound **3g** in  $\text{CDCl}_3$  (400 MHz)

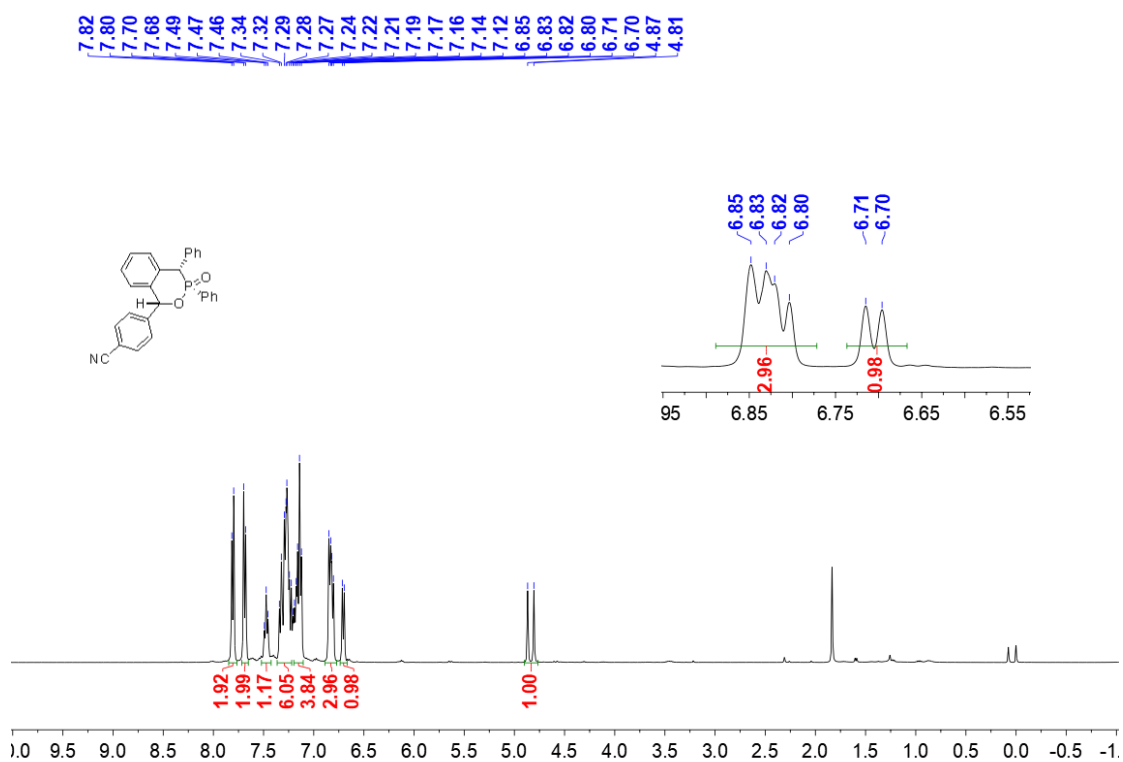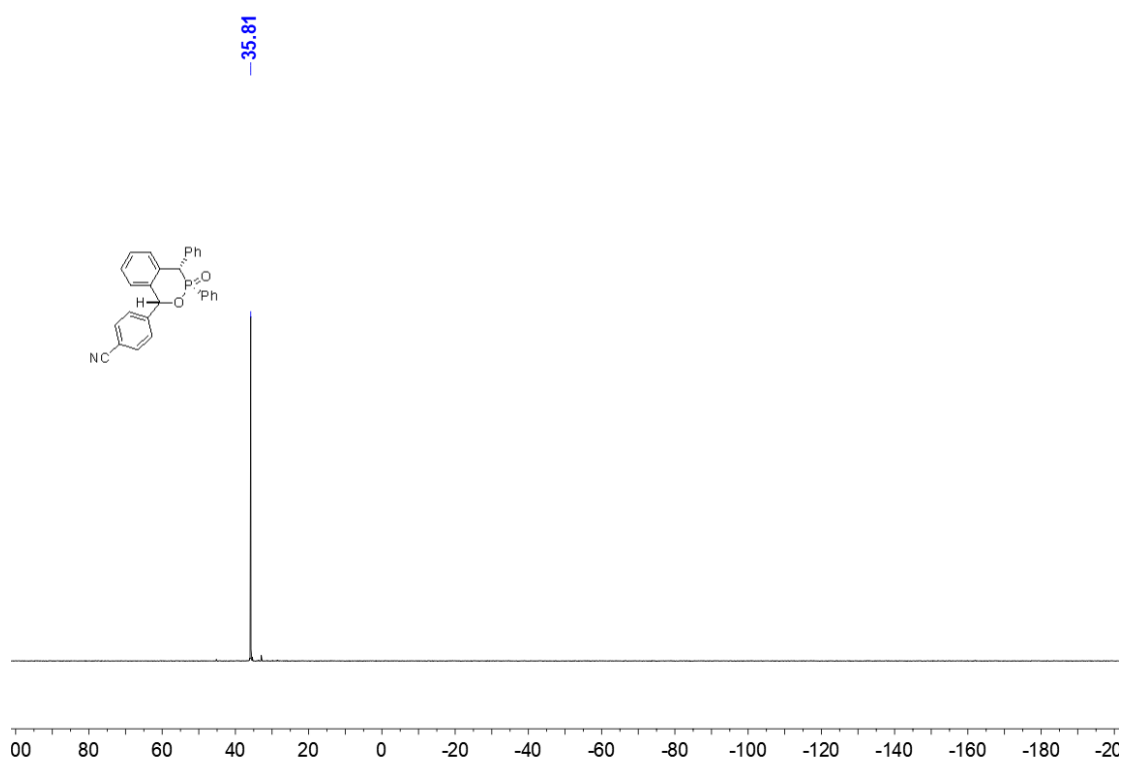

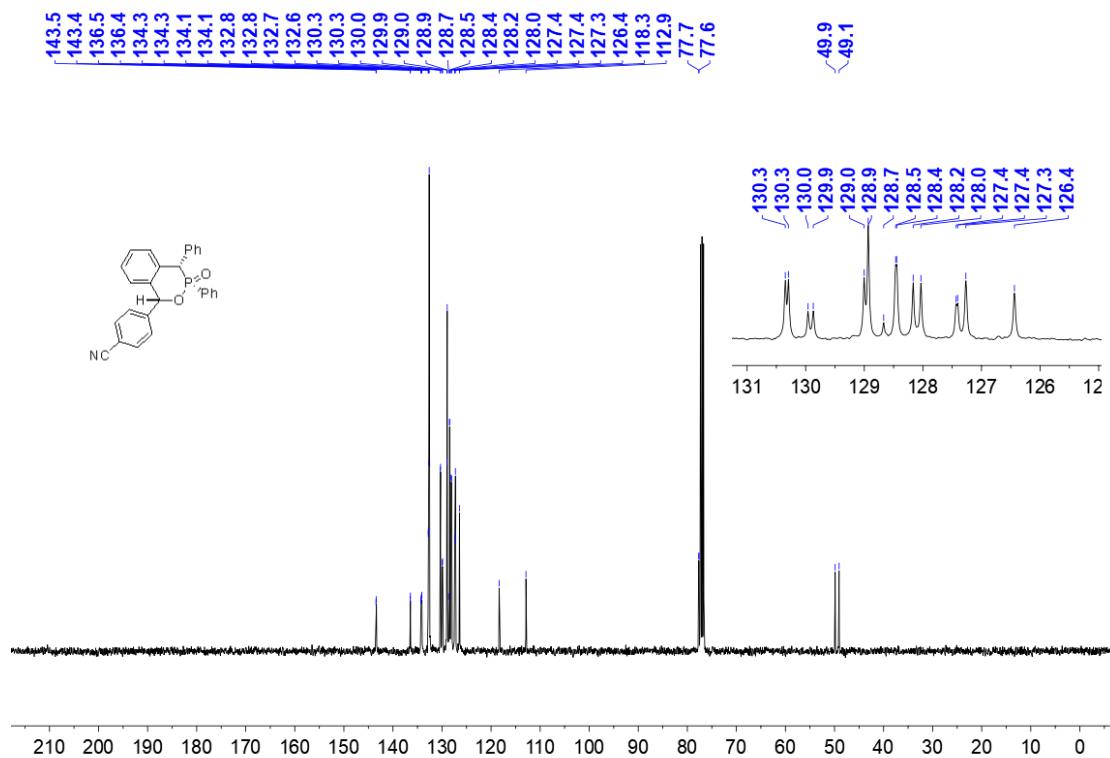

<sup>1</sup>H, <sup>31</sup>P and <sup>13</sup>C NMR spectra of compound **3h** in CDCl<sub>3</sub> (400 MHz)

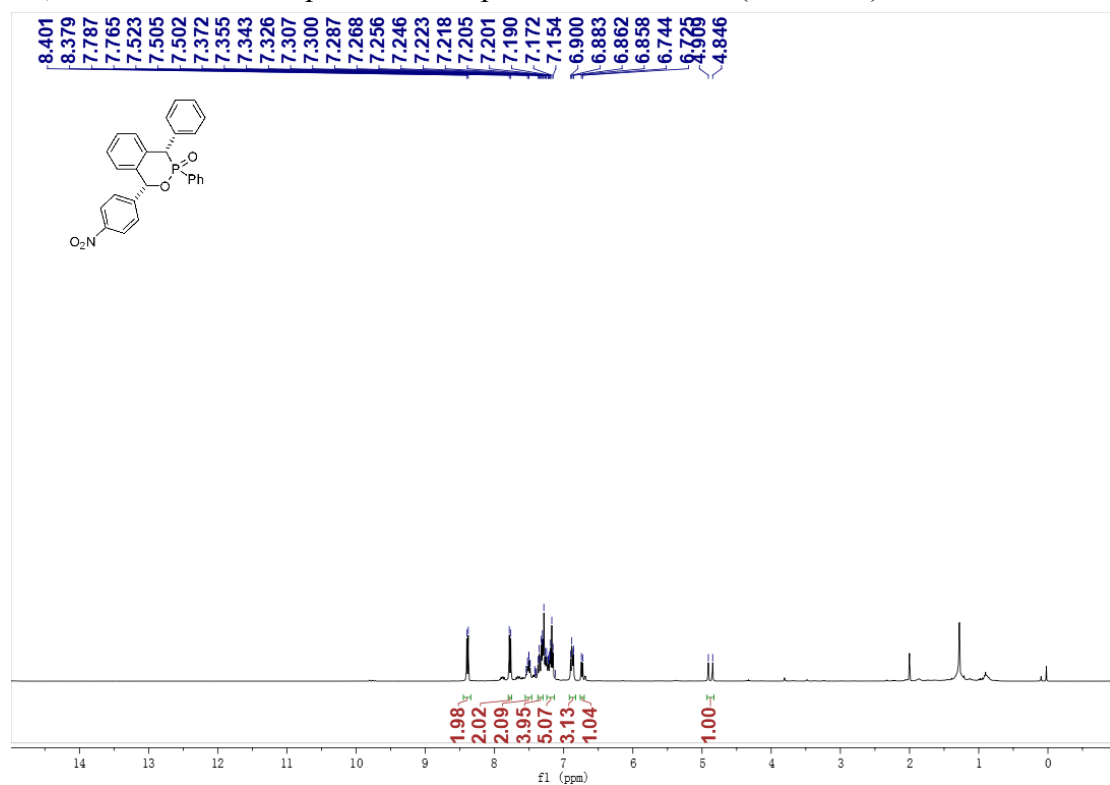

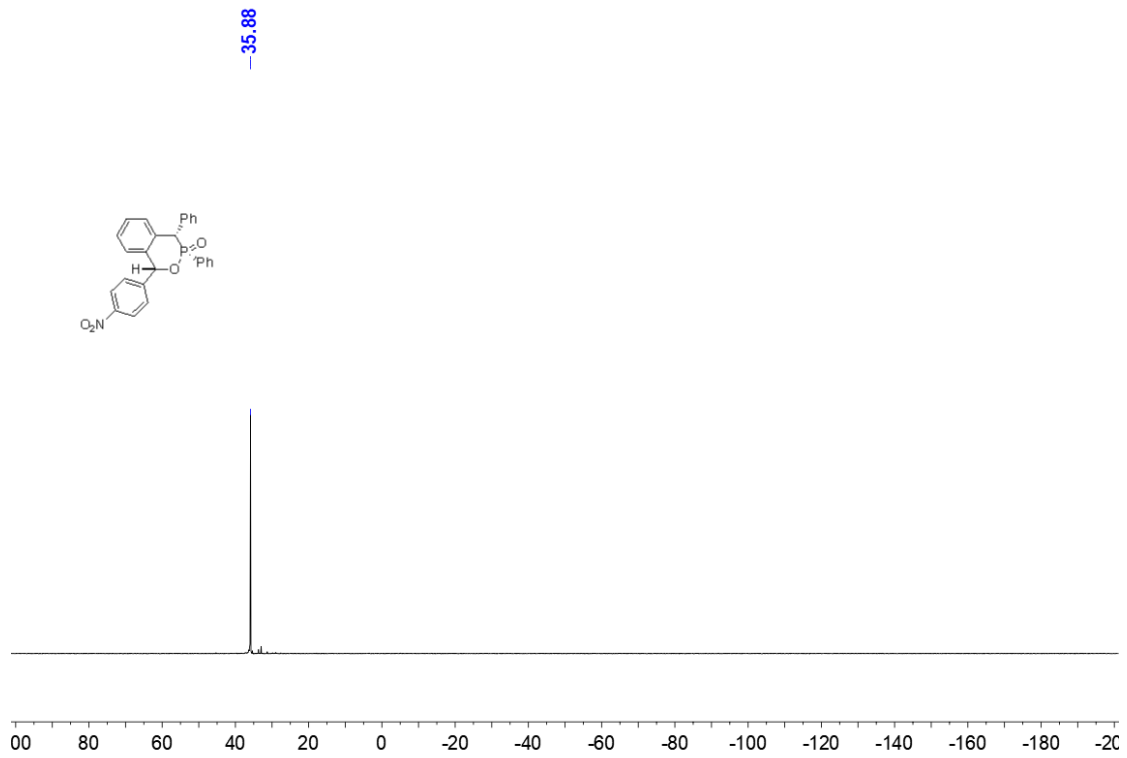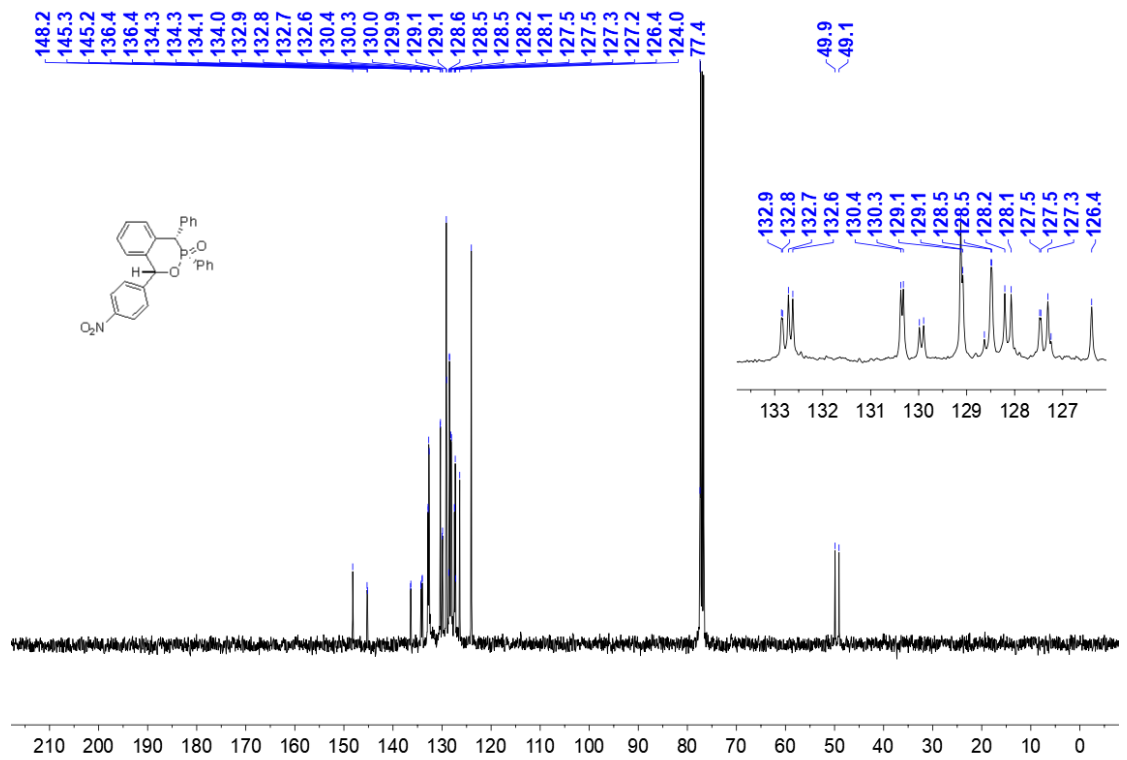



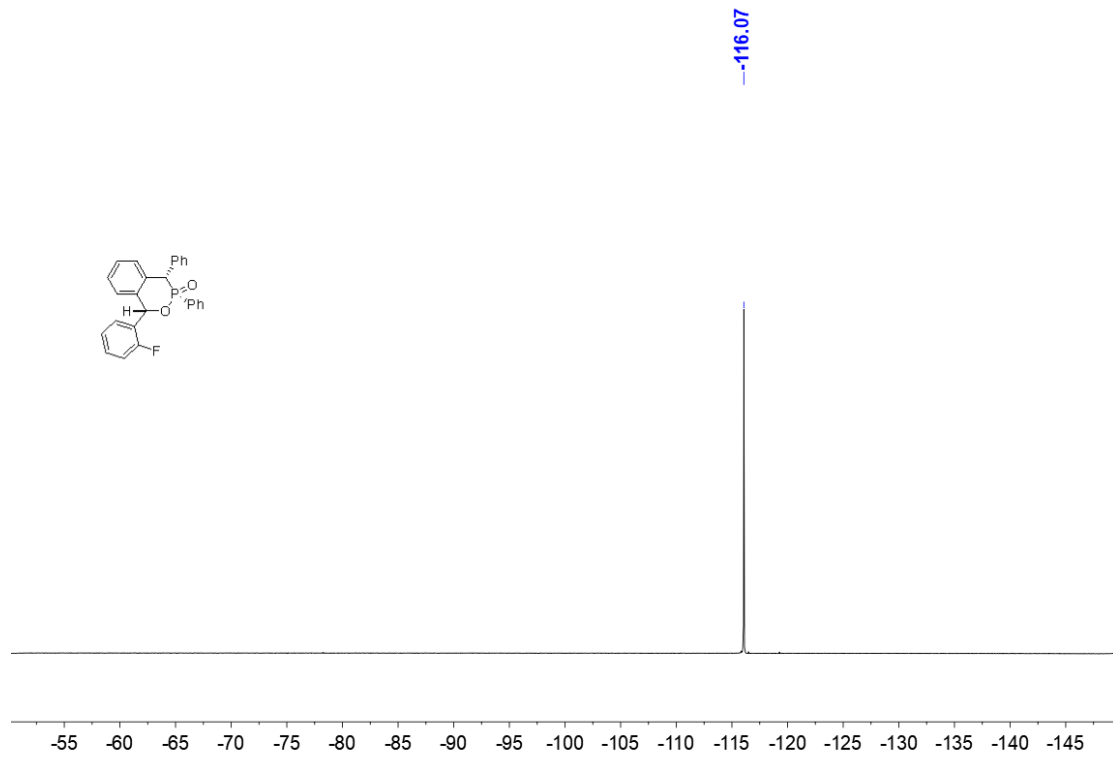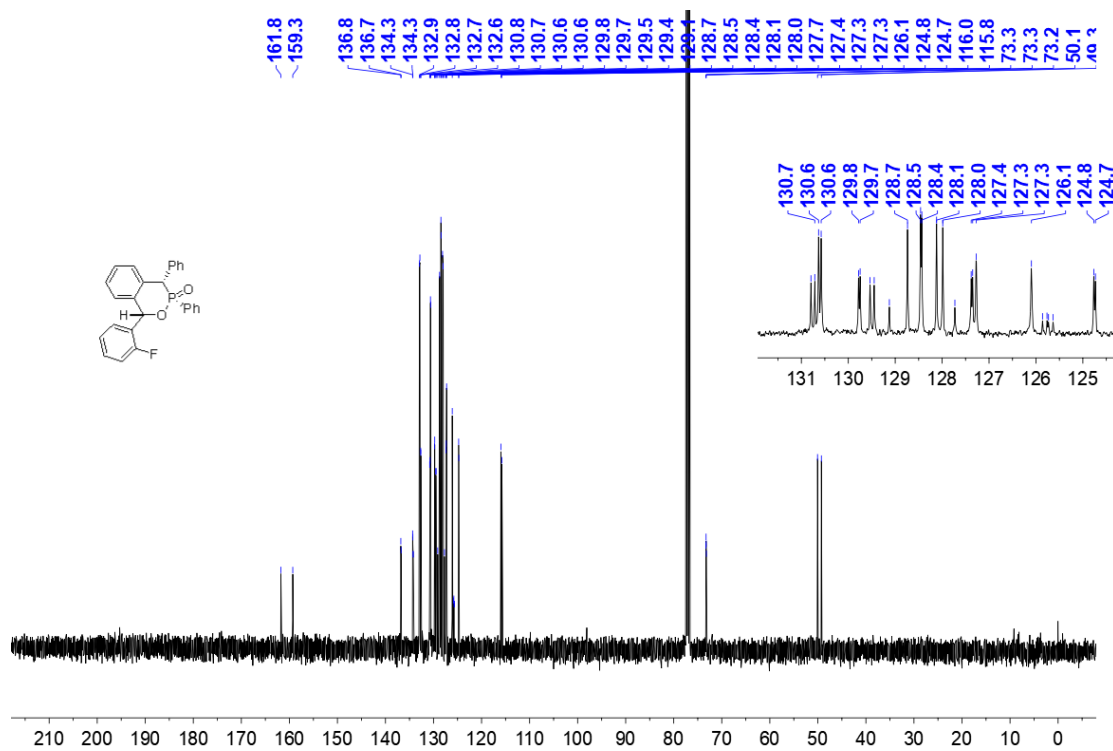

$^1\text{H}$ ,  $^{31}\text{P}$  and  $^{13}\text{C}$  NMR spectra of compound **3j** in  $\text{CDCl}_3$  (400 MHz)

7.733  
7.724  
7.721  
7.715  
7.710  
7.557  
7.552  
7.546  
7.542  
7.540  
7.533  
7.528  
7.524  
7.509  
7.506  
7.491  
7.488  
7.467  
7.462  
7.449  
7.444  
7.444  
7.435  
7.426  
7.421  
7.371  
7.353  
7.350  
7.341  
7.321  
7.311  
7.303  
7.293  
7.286  
7.278  
7.257  
7.234  
7.231  
7.227  
7.216  
7.198  
7.182  
7.139  
7.122  
6.914  
6.899  
6.895  
6.764  
6.746  
4.980  
4.911

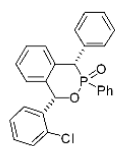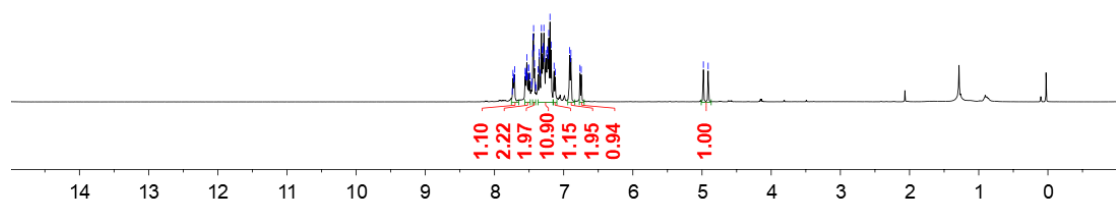

-34.95

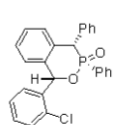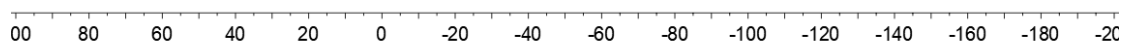



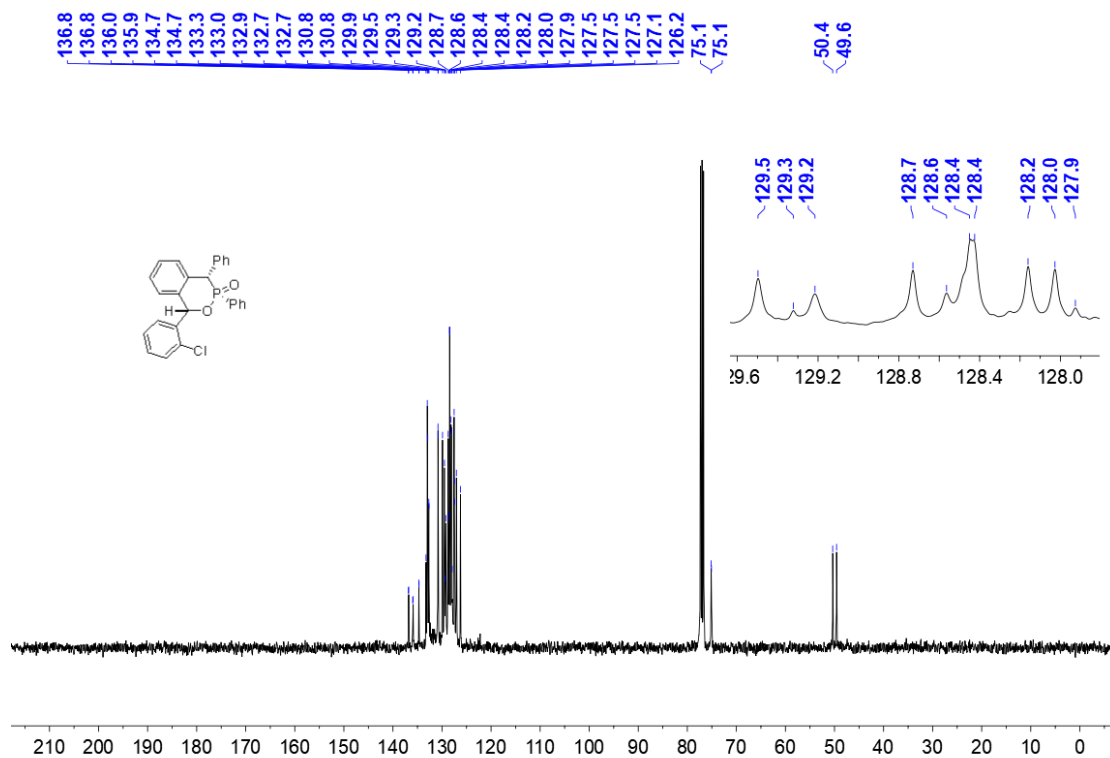

$^1\text{H}$  and  $^{31}\text{P}$  NMR spectra of compound **3k** in  $\text{CDCl}_3$  (400 MHz)

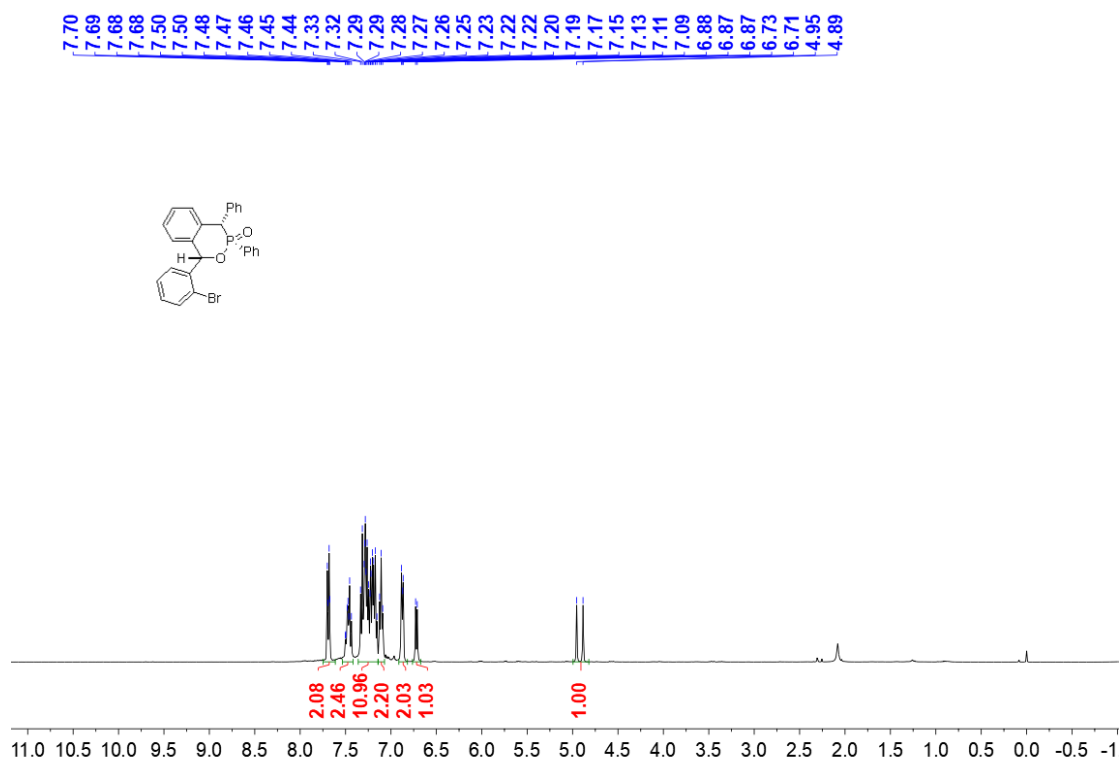

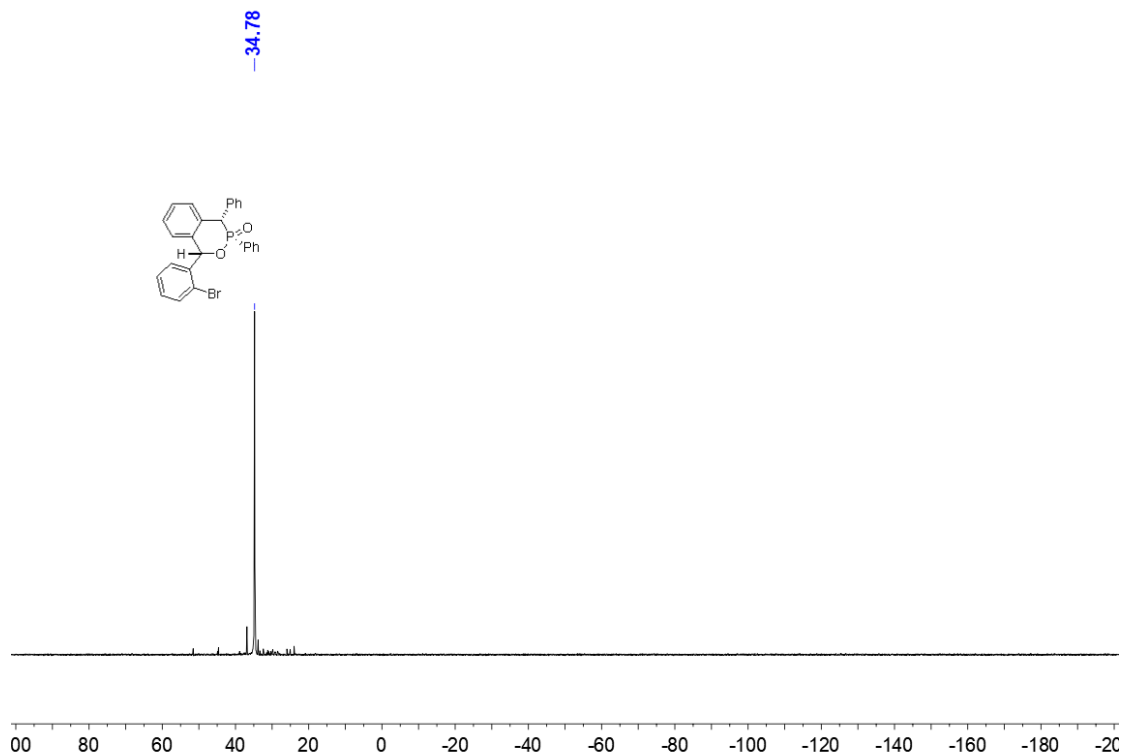

<sup>1</sup>H, <sup>31</sup>P and <sup>13</sup>C NMR spectra of compound **3I** in CDCl<sub>3</sub> (400 MHz)

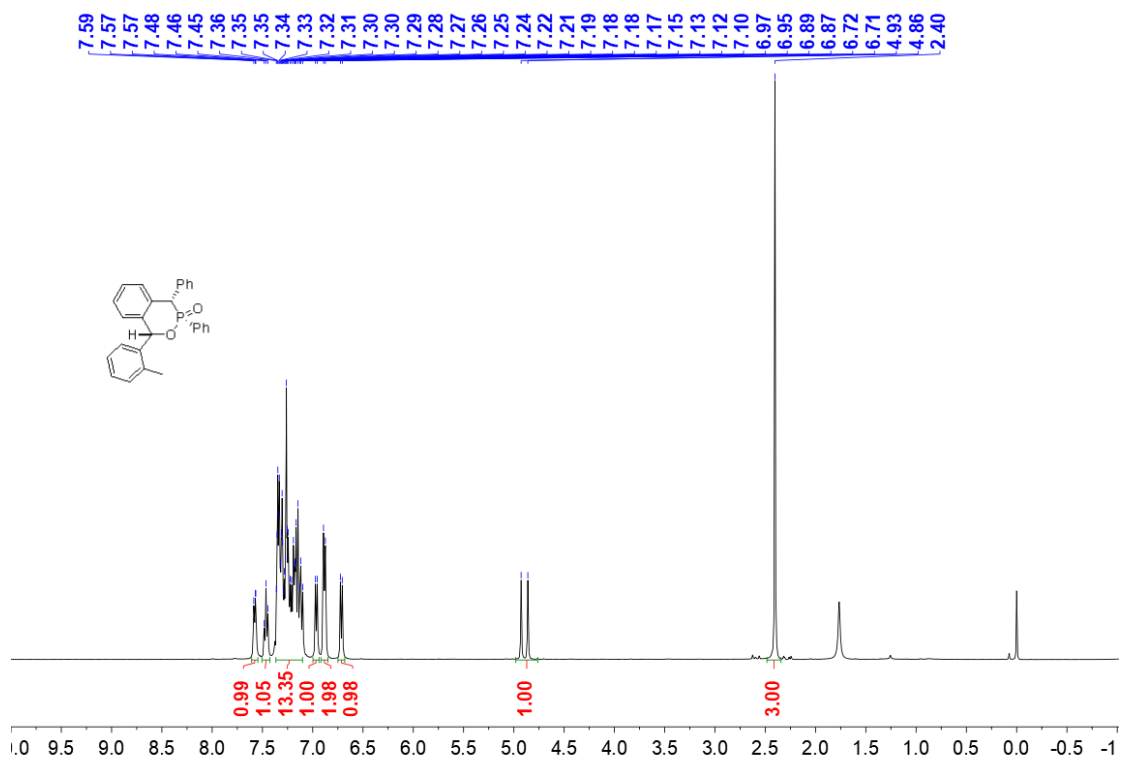

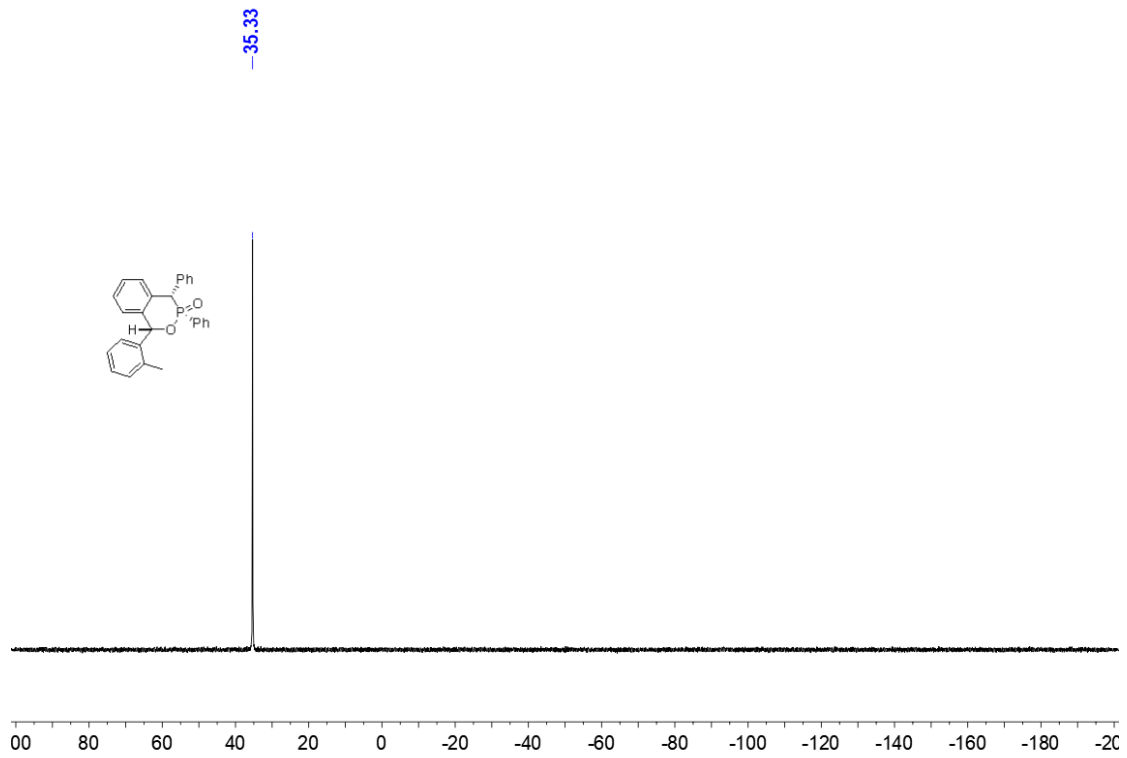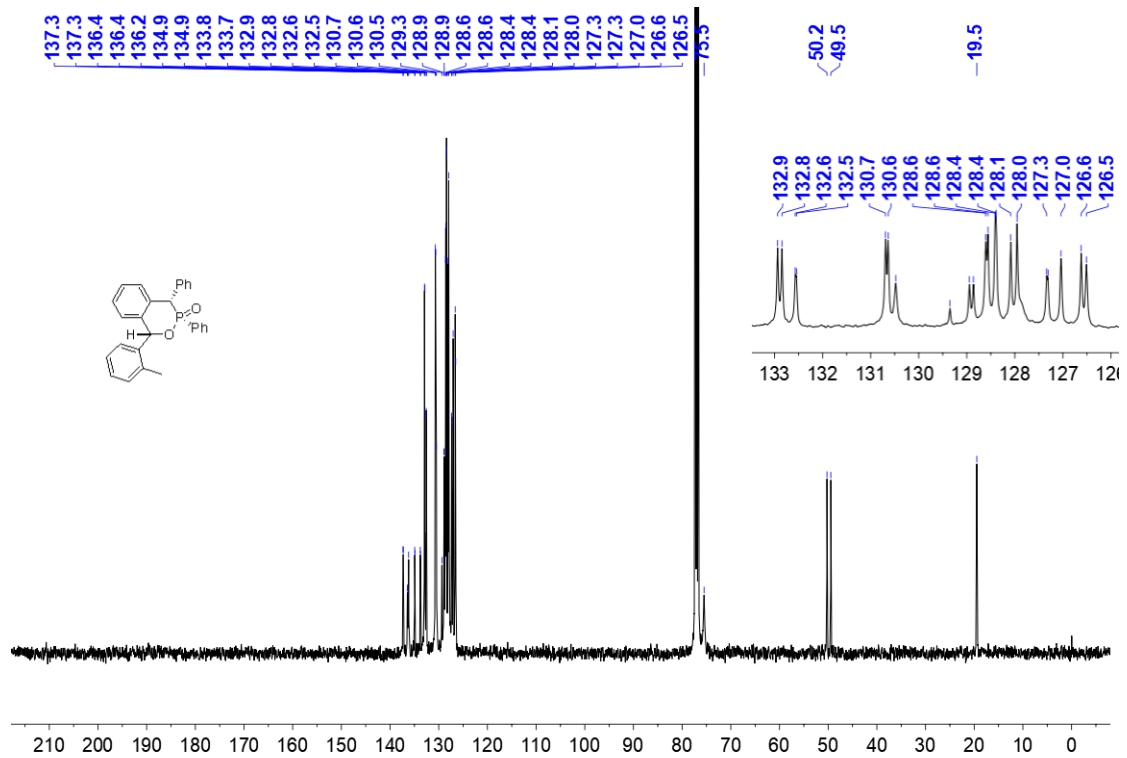

$^1\text{H}$ ,  $^{31}\text{P}$  and  $^{13}\text{C}$  NMR spectra of compound **3m** in  $\text{CDCl}_3$  (400 MHz)

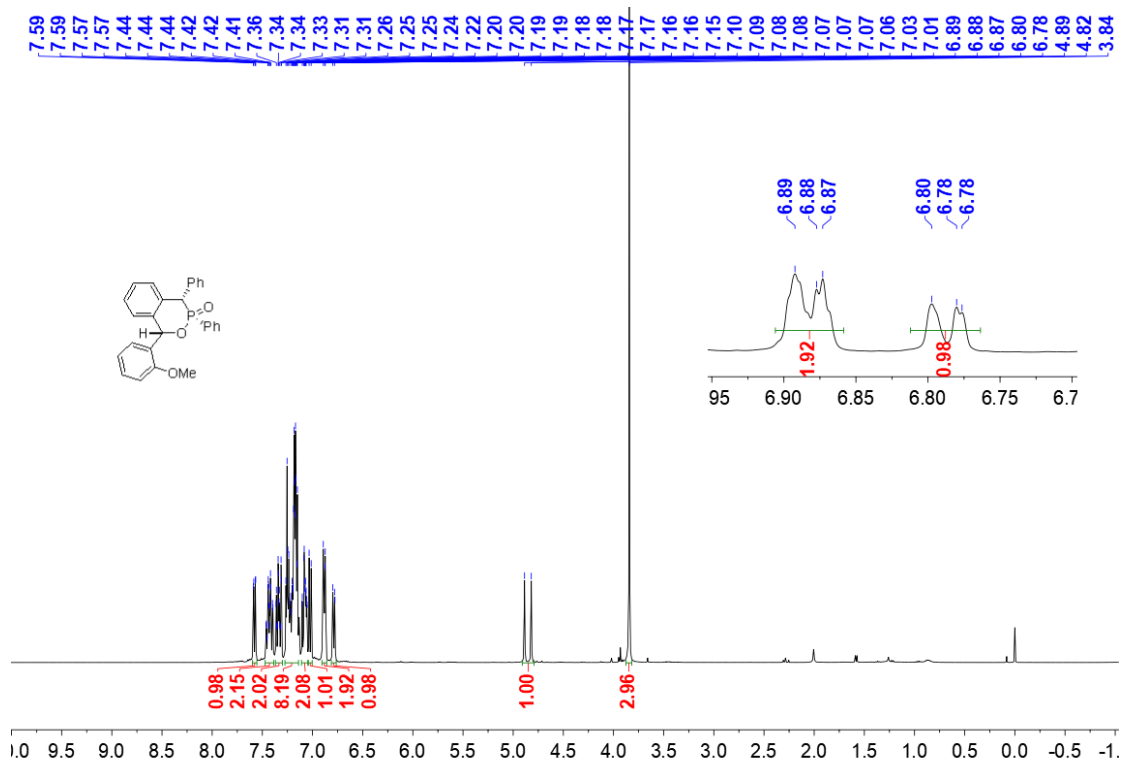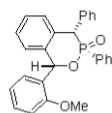

-34.84

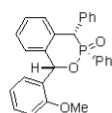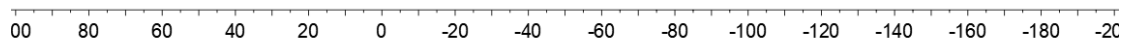

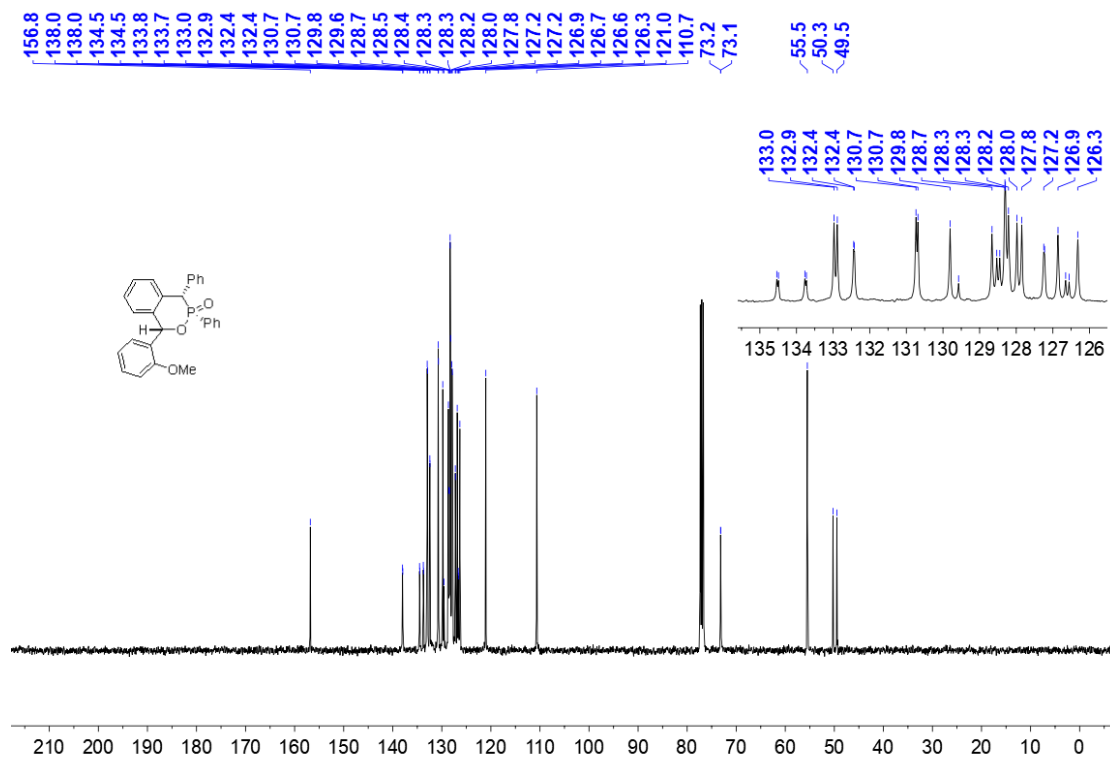

**<sup>1</sup>H, <sup>31</sup>P and <sup>13</sup>C NMR spectra of compound 3n in CDCl<sub>3</sub> (400 MHz)**

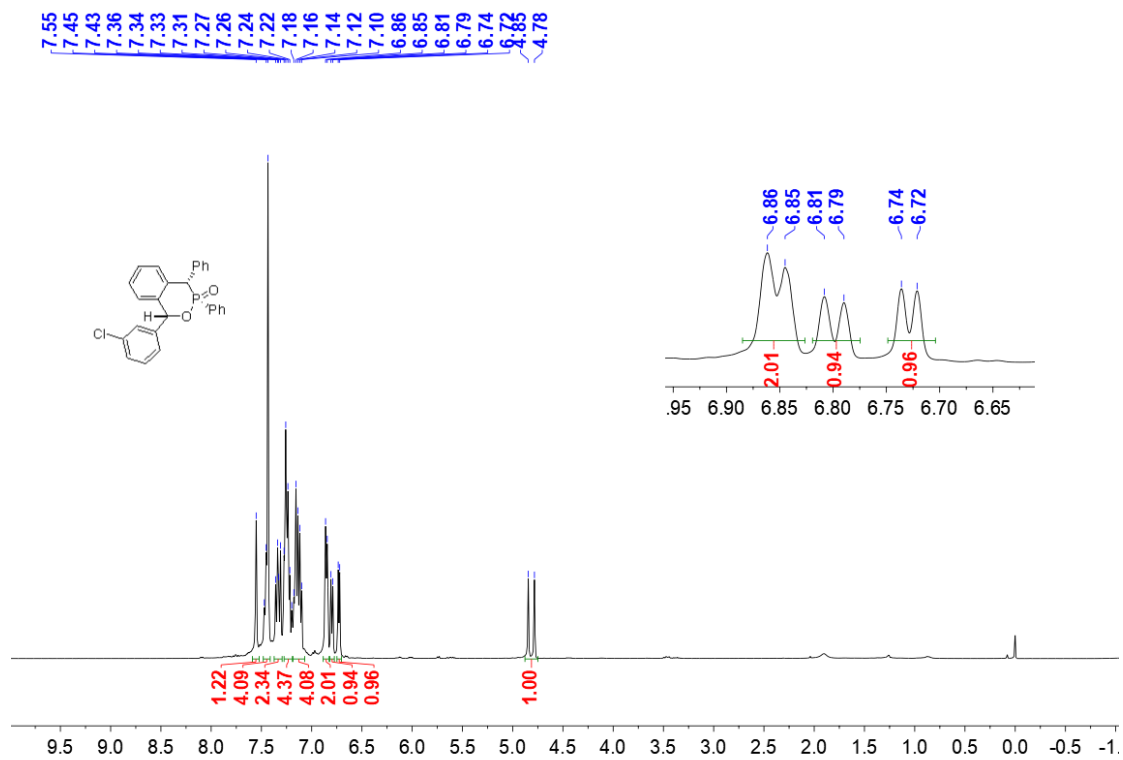

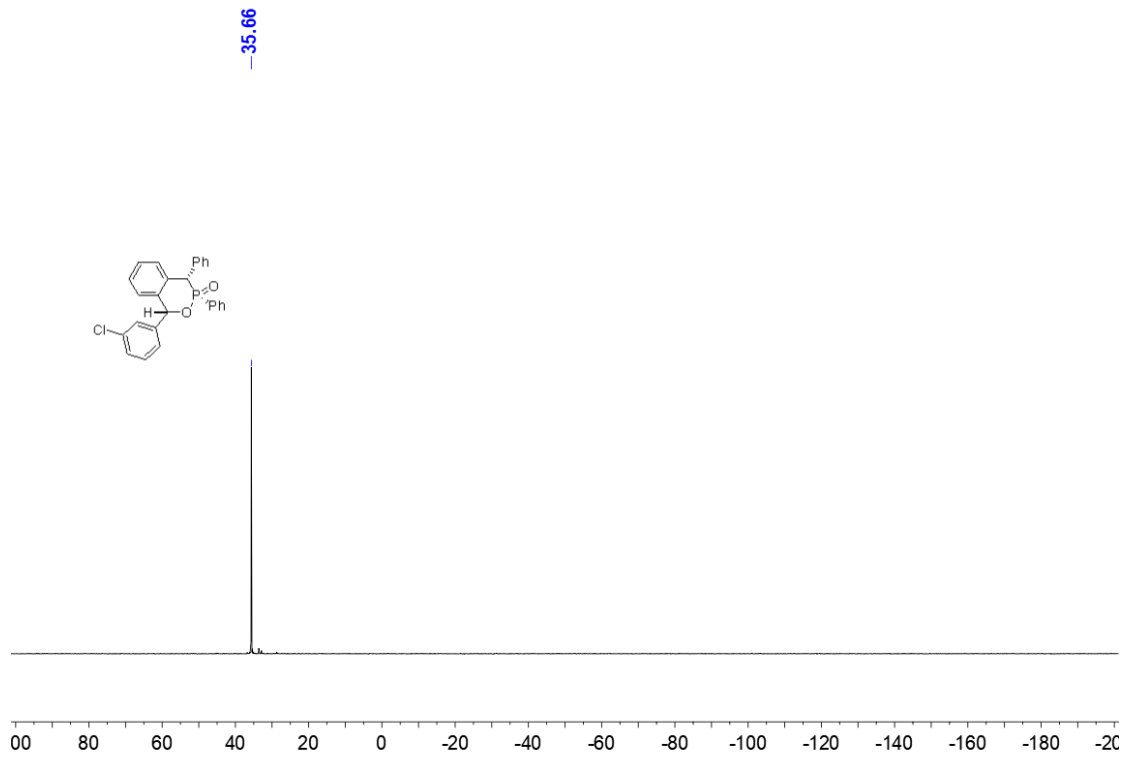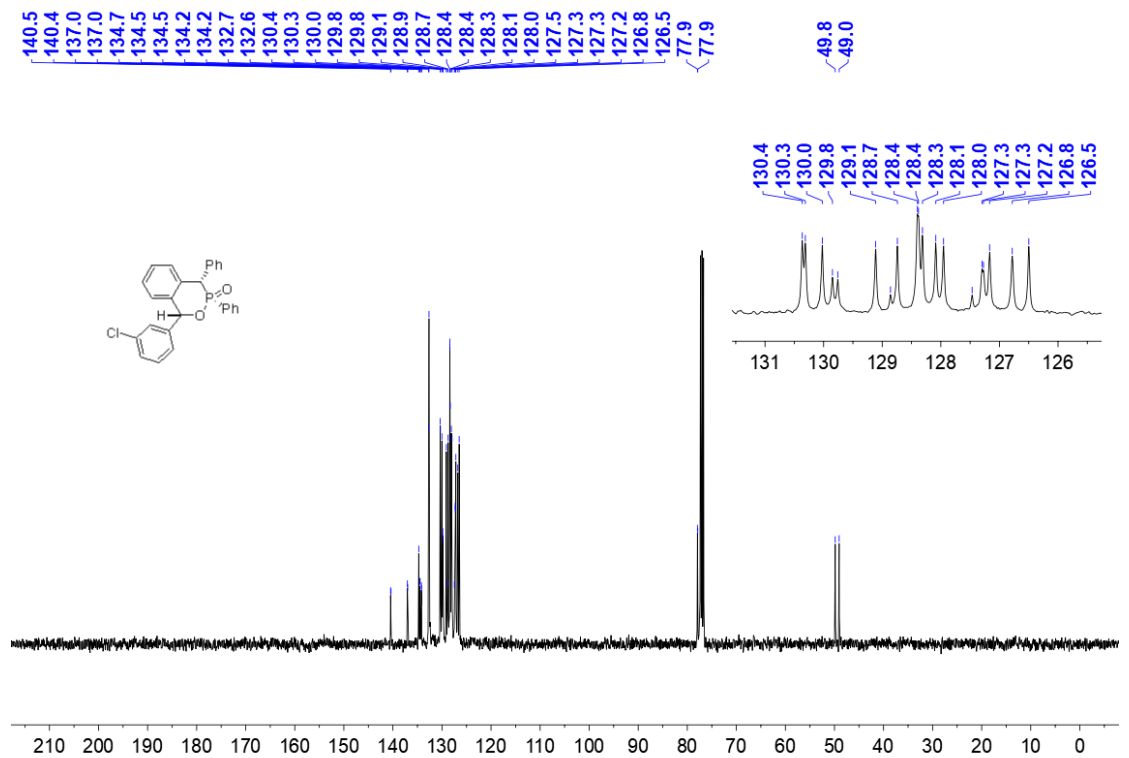

$^1\text{H}$ ,  $^{31}\text{P}$  and  $^{13}\text{C}$  NMR spectra of compound **3o** in  $\text{CDCl}_3$  (400 MHz)

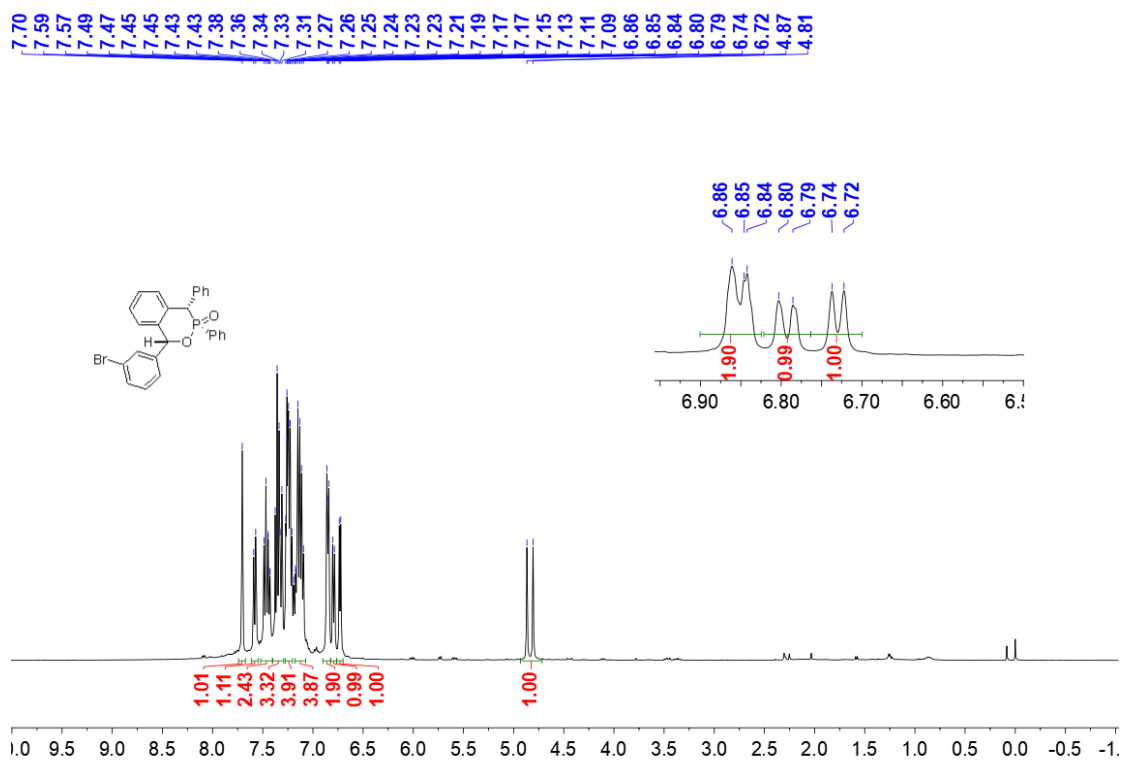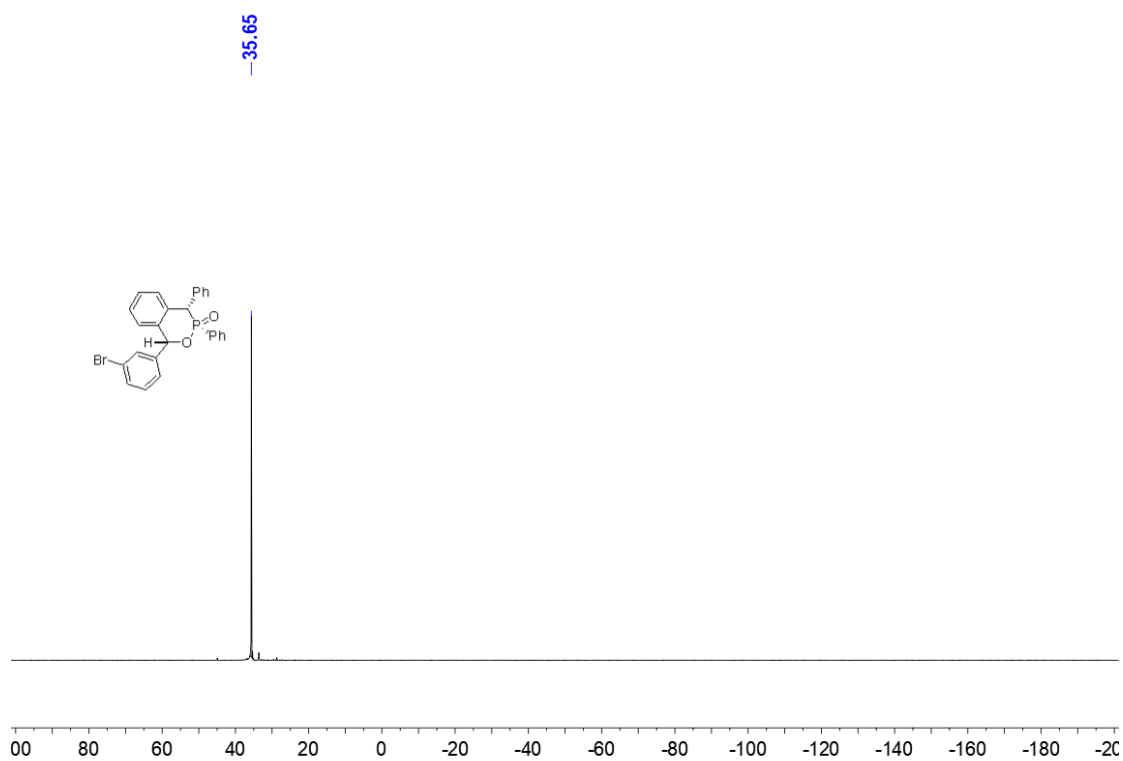

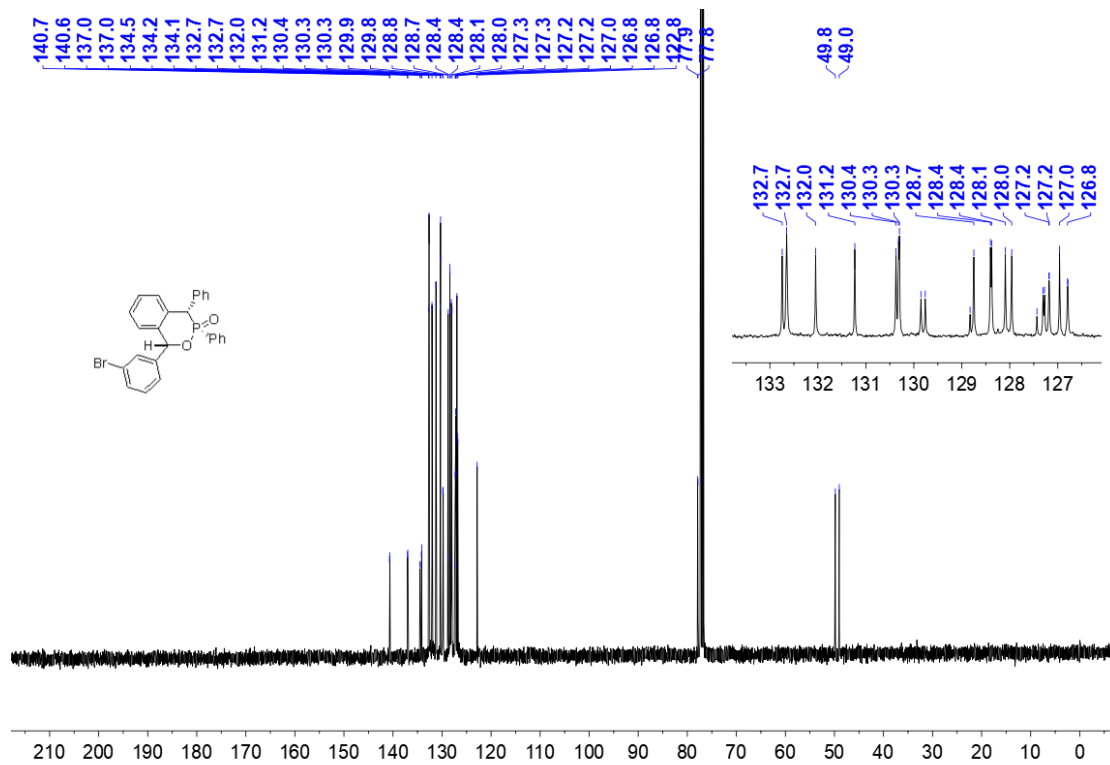

<sup>1</sup>H, <sup>31</sup>P and <sup>13</sup>C NMR spectra of compound **3p** in CDCl<sub>3</sub> (400 MHz)

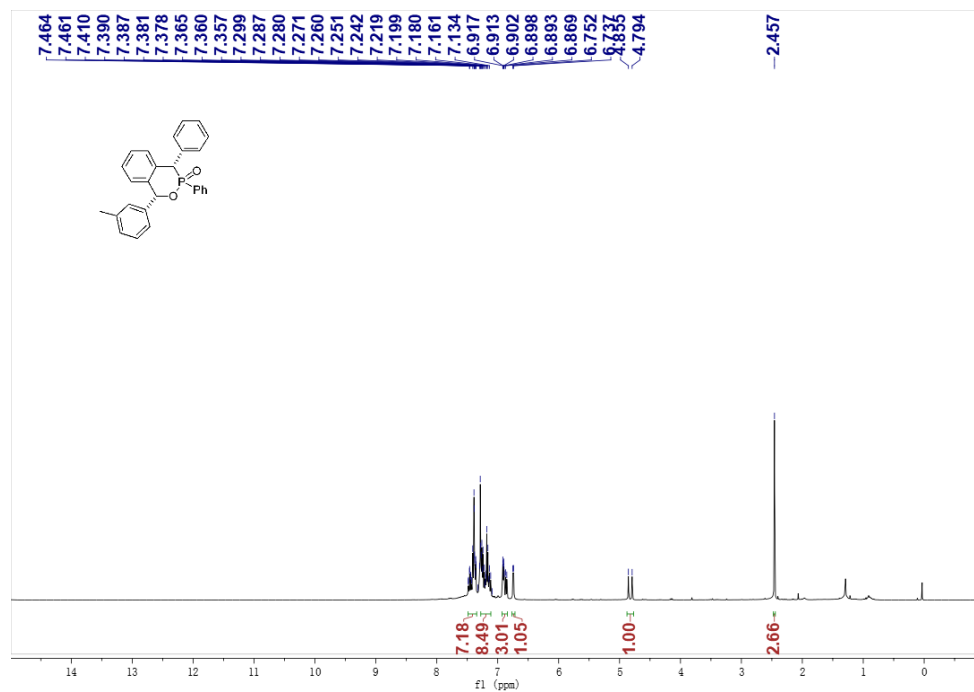



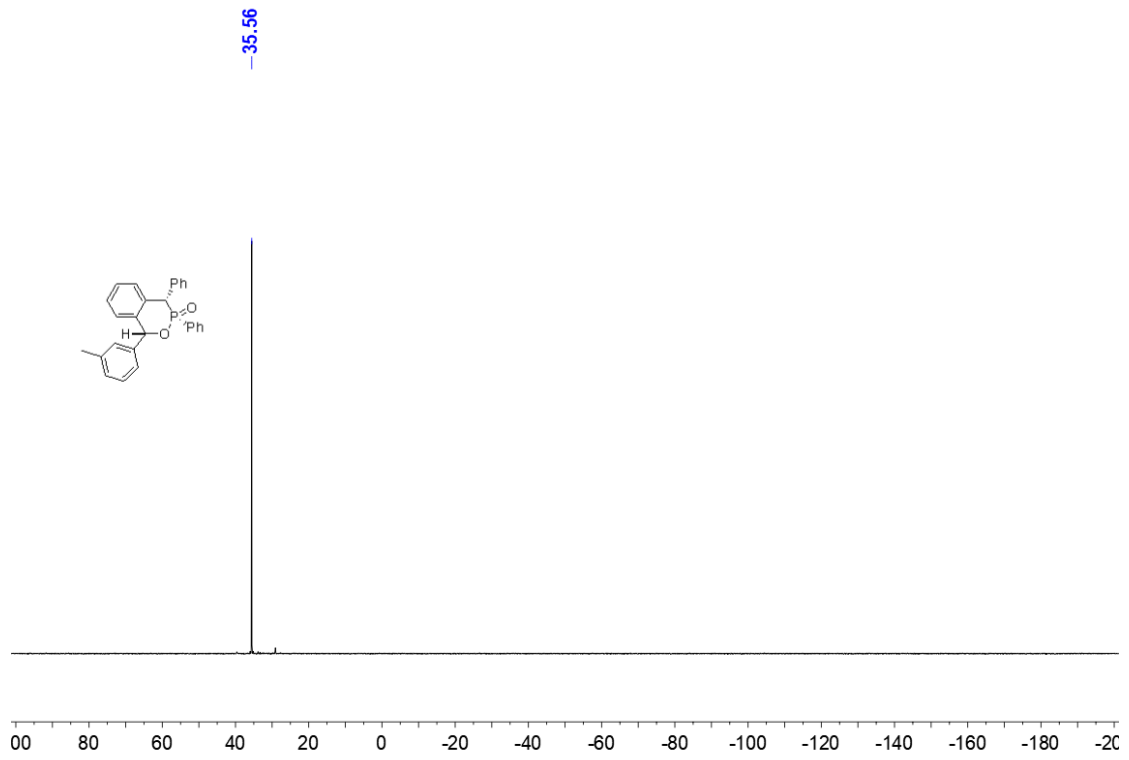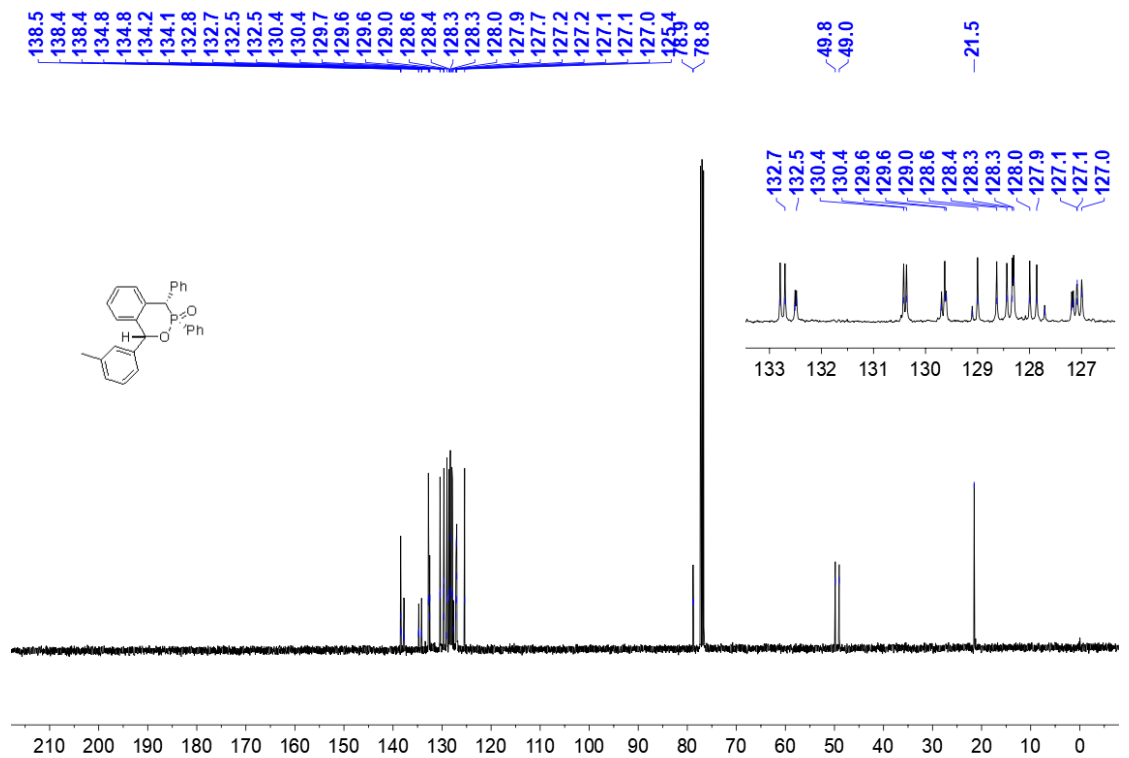

$^1\text{H}$ ,  $^{31}\text{P}$  and  $^{13}\text{C}$  NMR spectra of compound **3q** in  $\text{CDCl}_3$  (400 MHz)

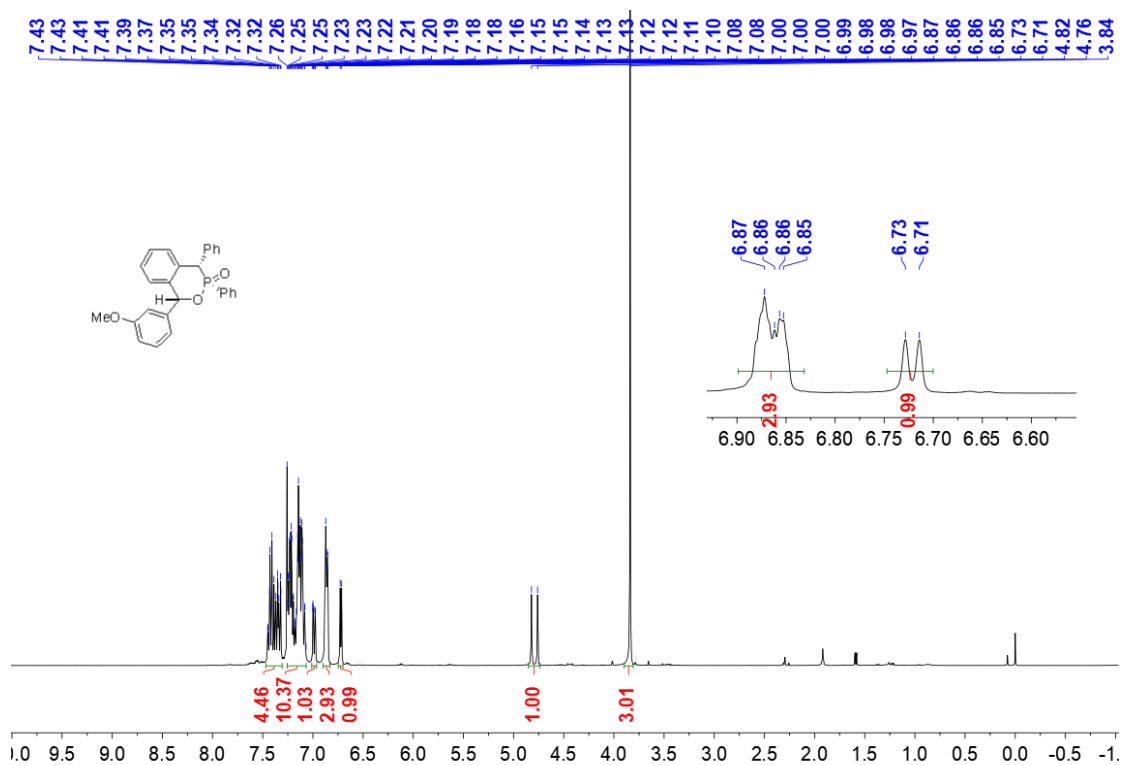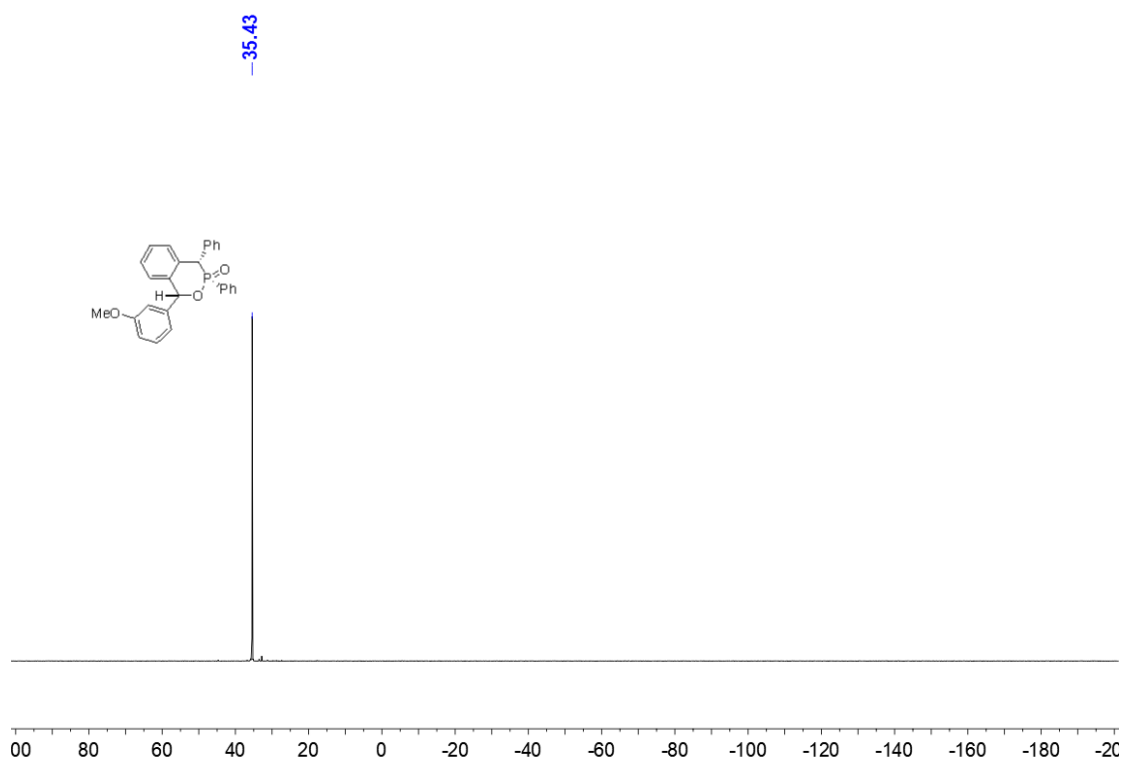

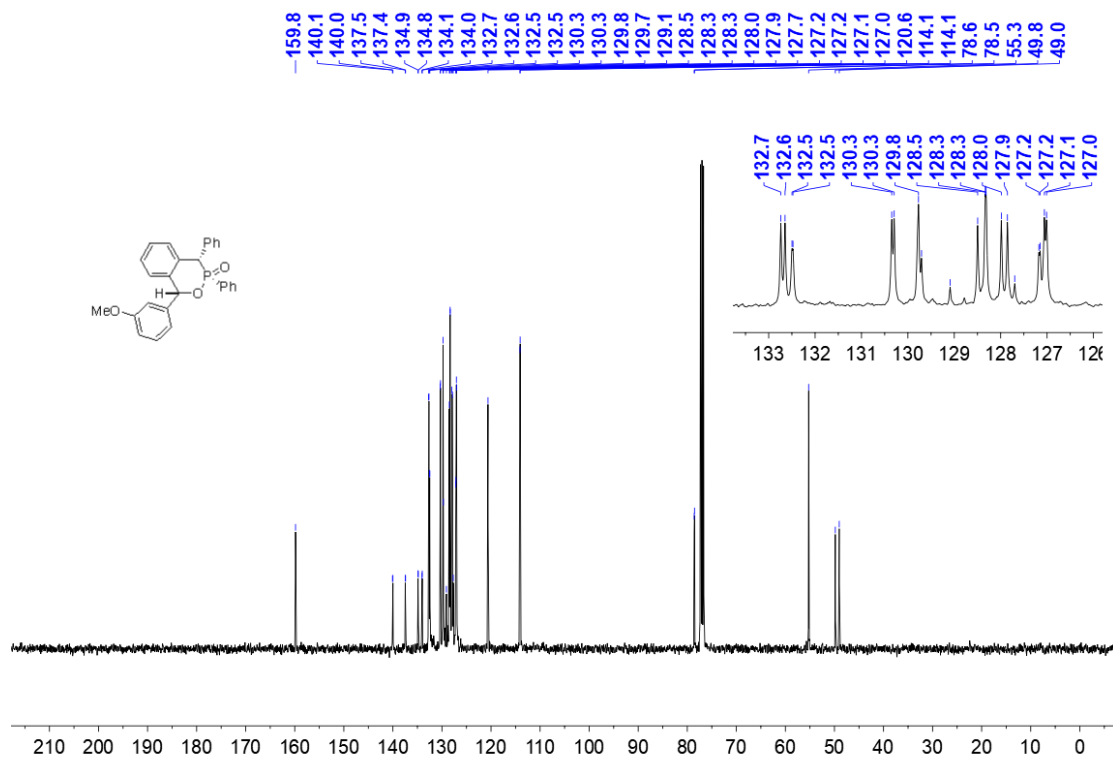

$^1\text{H}$ ,  $^{31}\text{P}$  and  $^{13}\text{C}$  NMR spectra of compound **3r** in  $\text{CDCl}_3$  (400 MHz)

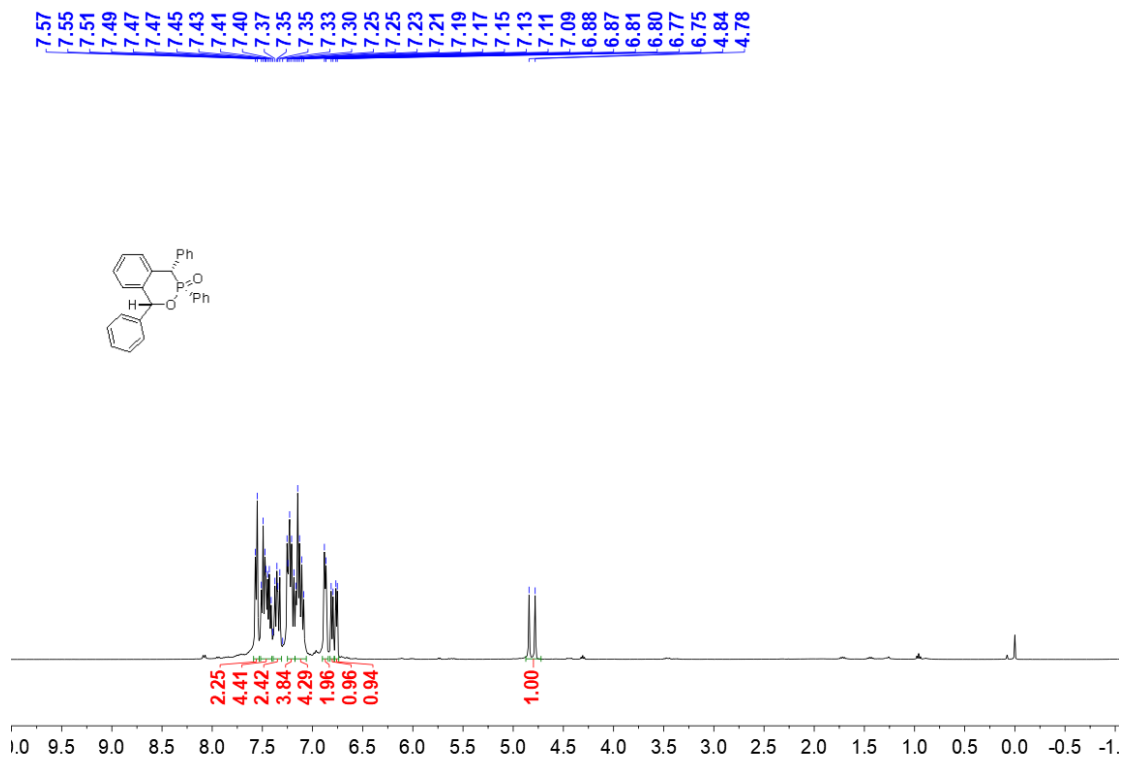

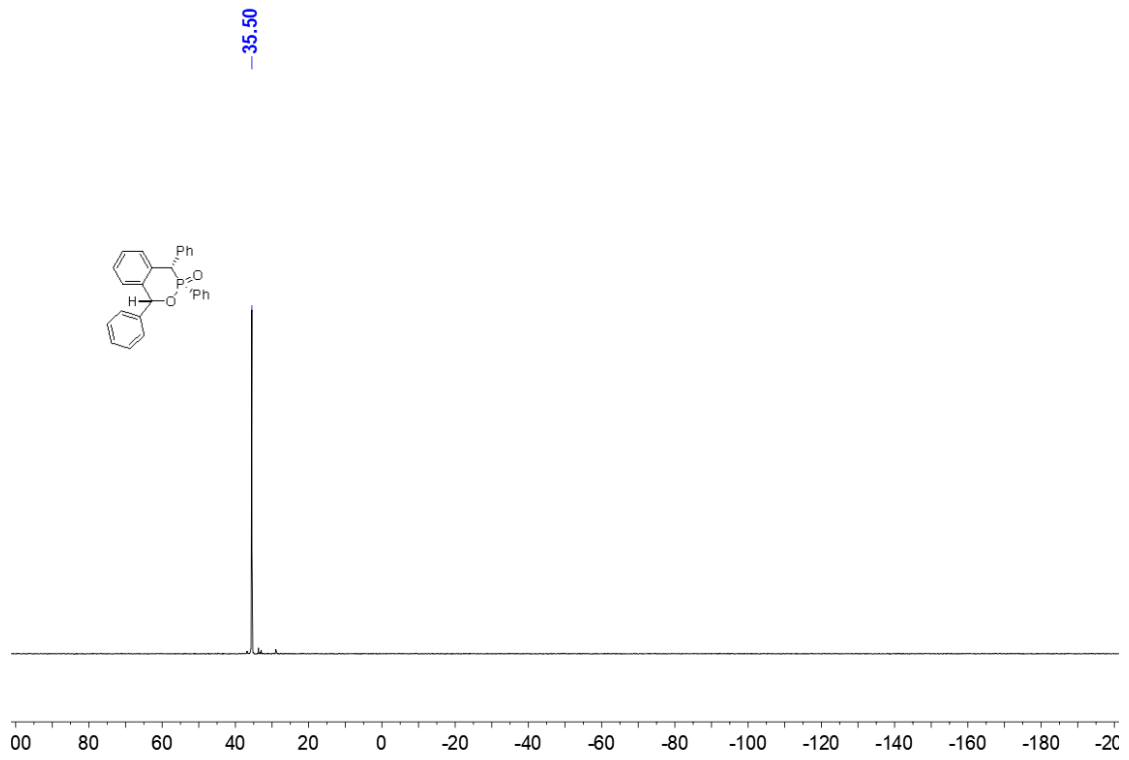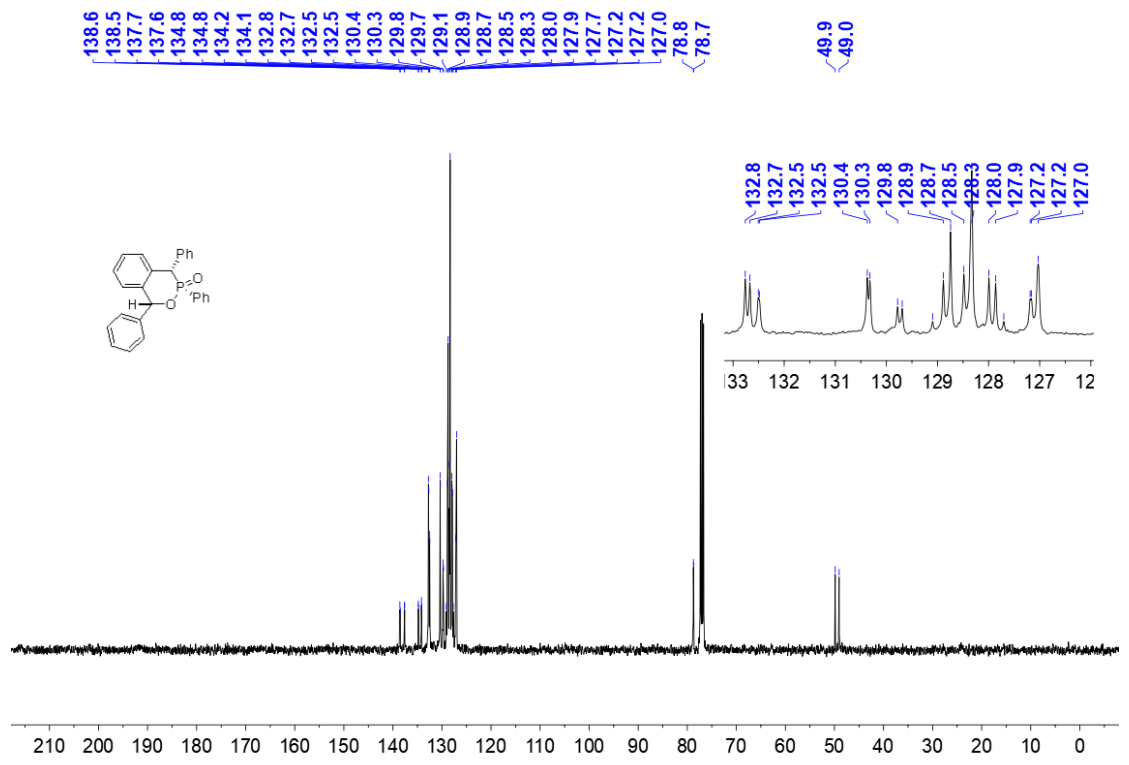

$^1\text{H}$ ,  $^{31}\text{P}$  and  $^{13}\text{C}$  NMR spectra of compound **3s** in  $\text{CDCl}_3$  (400 MHz)

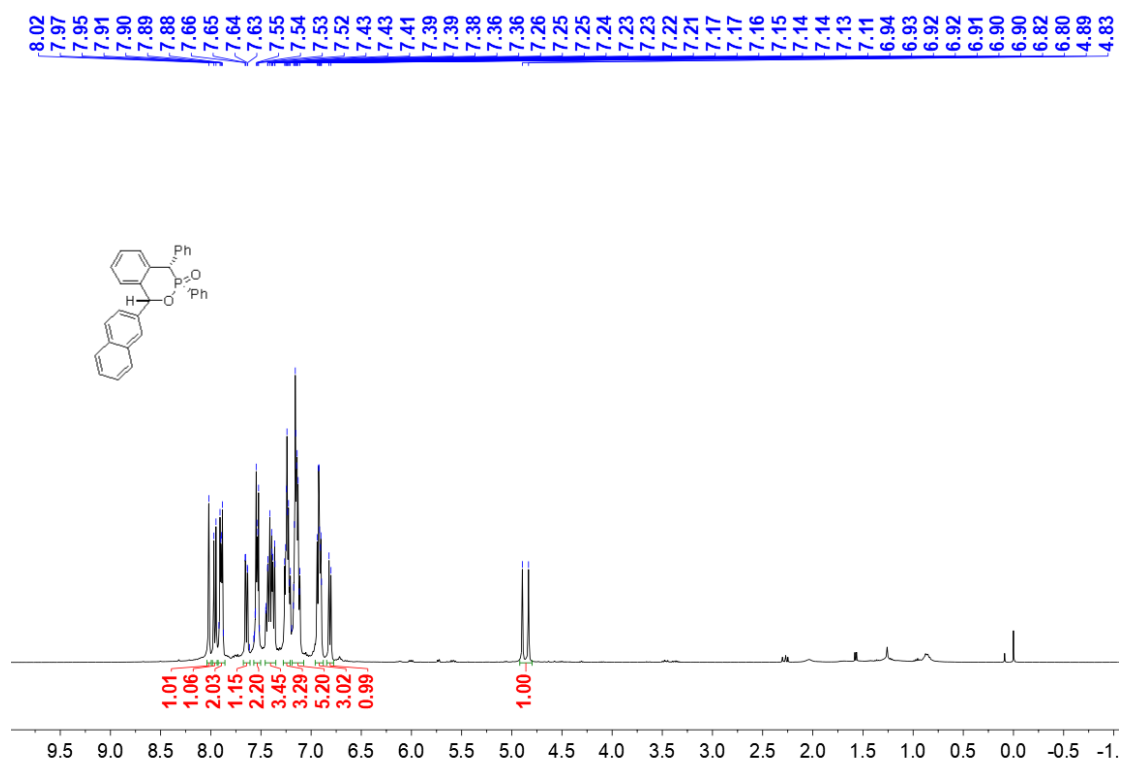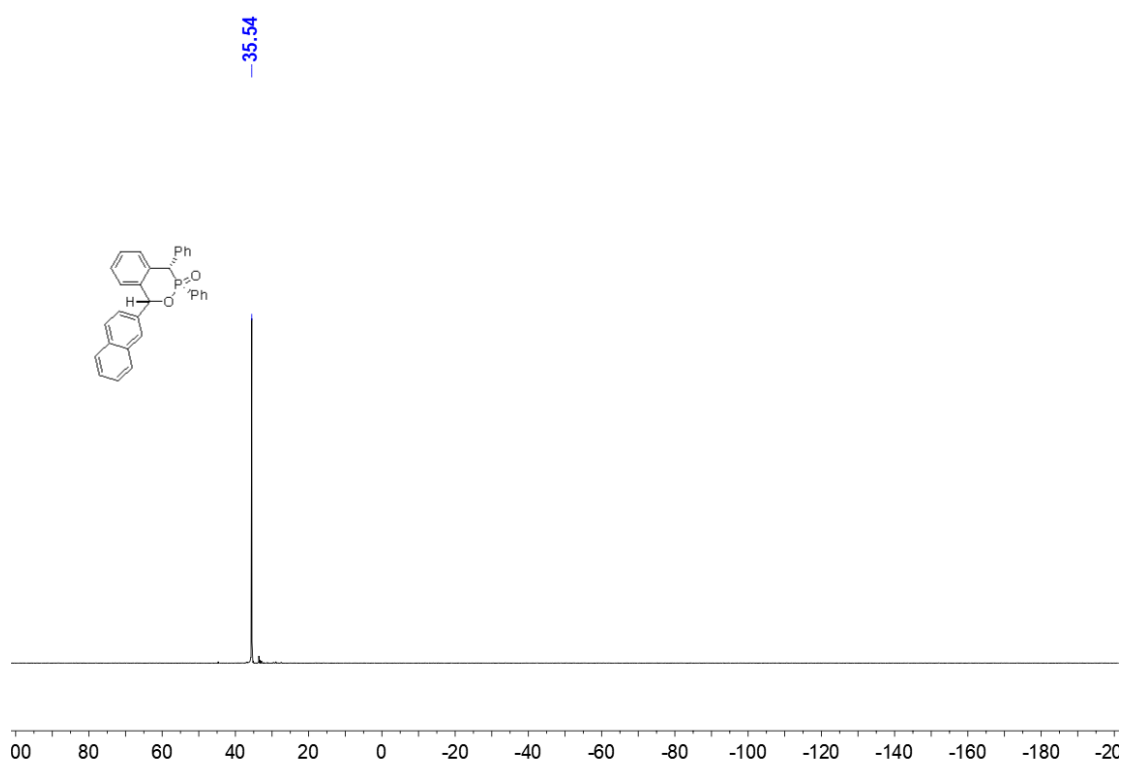

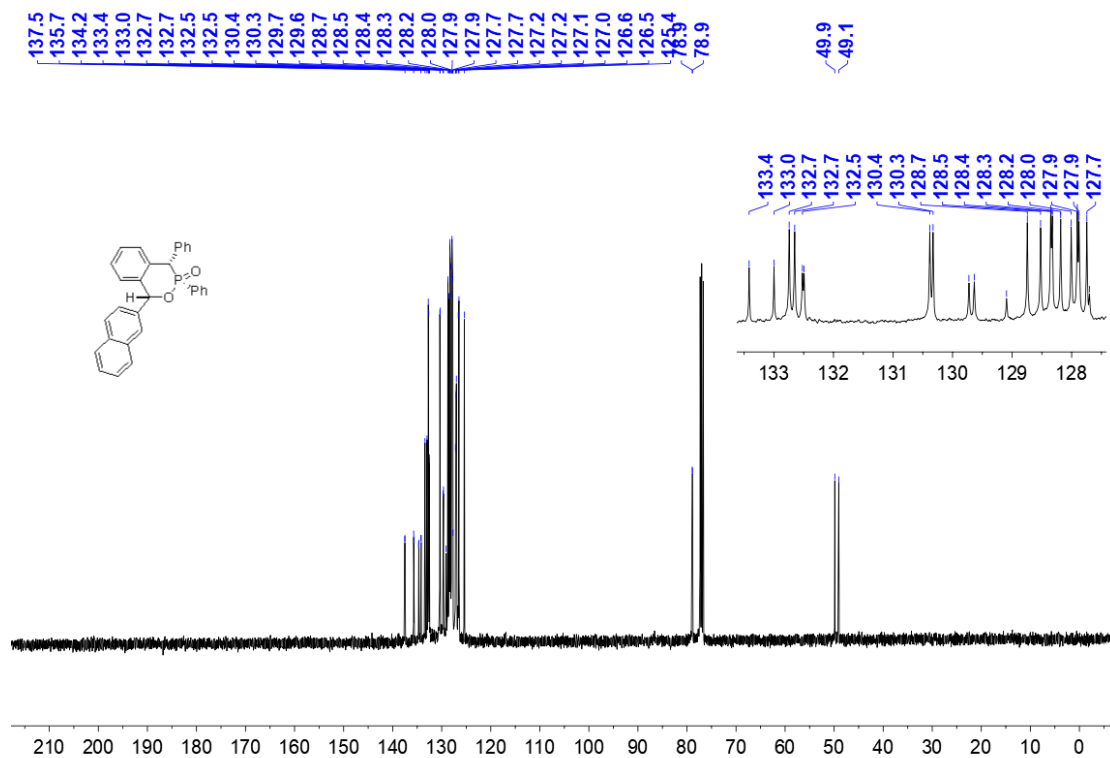

<sup>1</sup>H, <sup>31</sup>P and <sup>13</sup>C NMR spectra of compound **3t** in CDCl<sub>3</sub> (400 MHz)

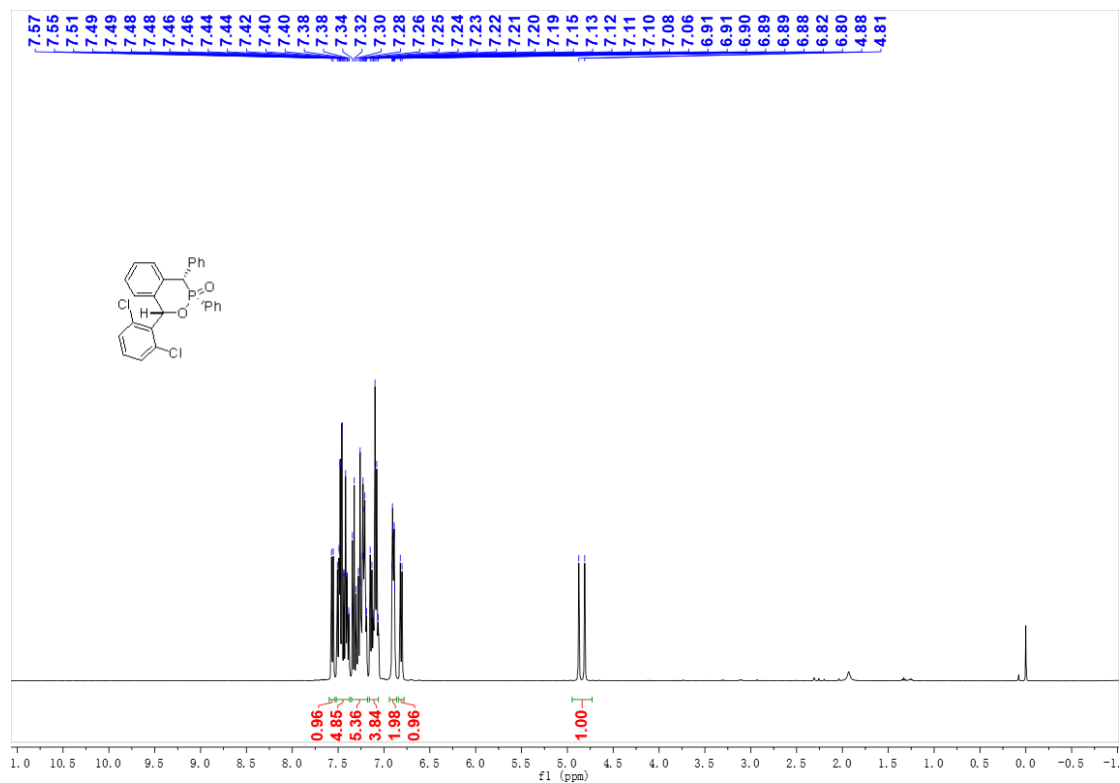

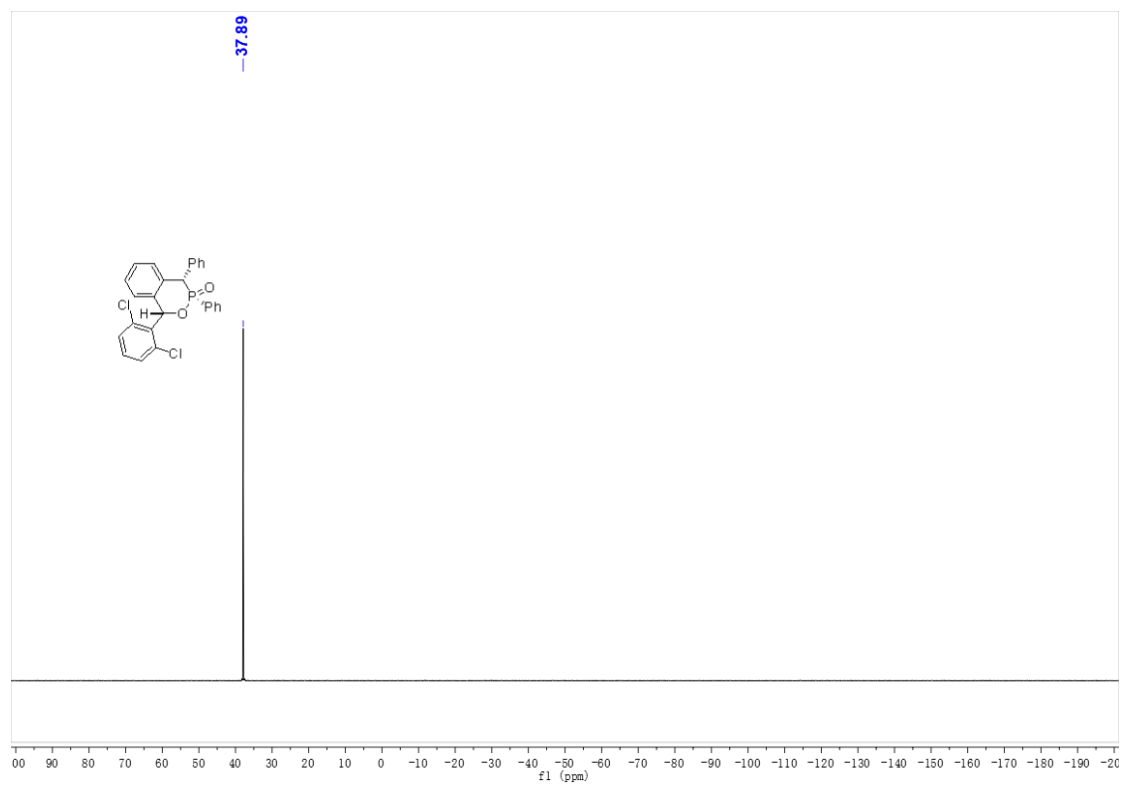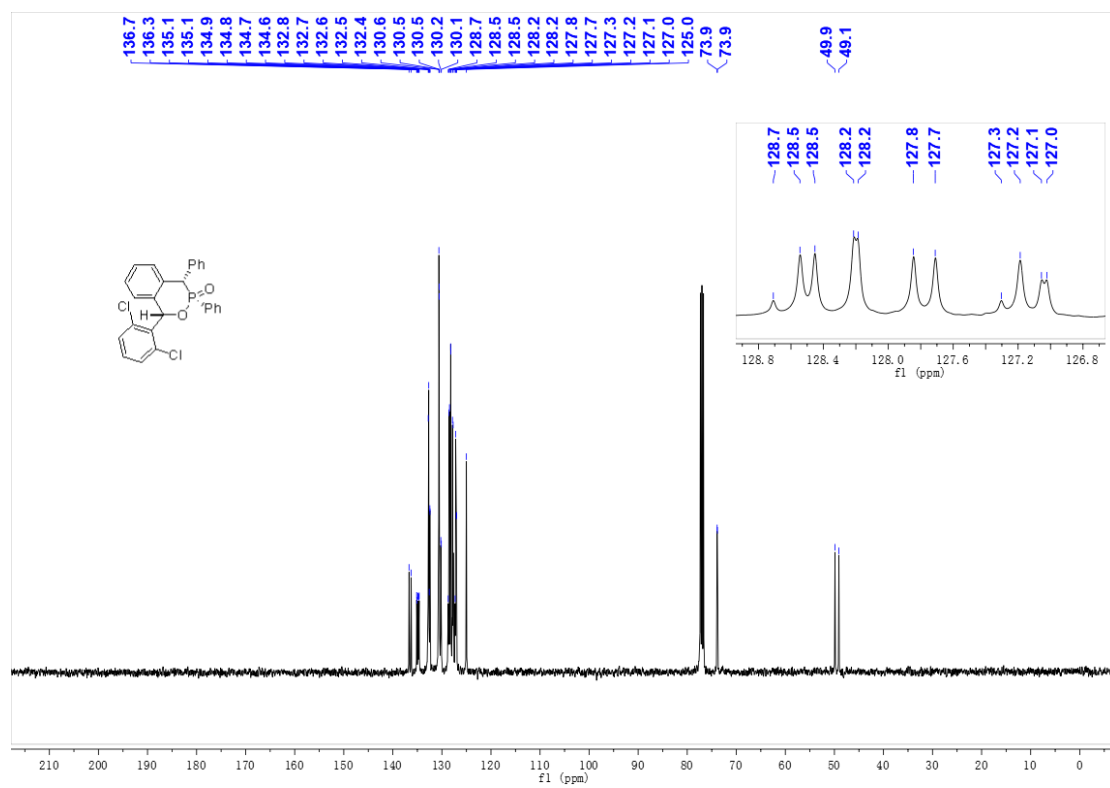

$^1\text{H}$ ,  $^{31}\text{P}$  and  $^{13}\text{C}$  NMR spectra of compound **3u** in  $\text{CDCl}_3$  (400 MHz)

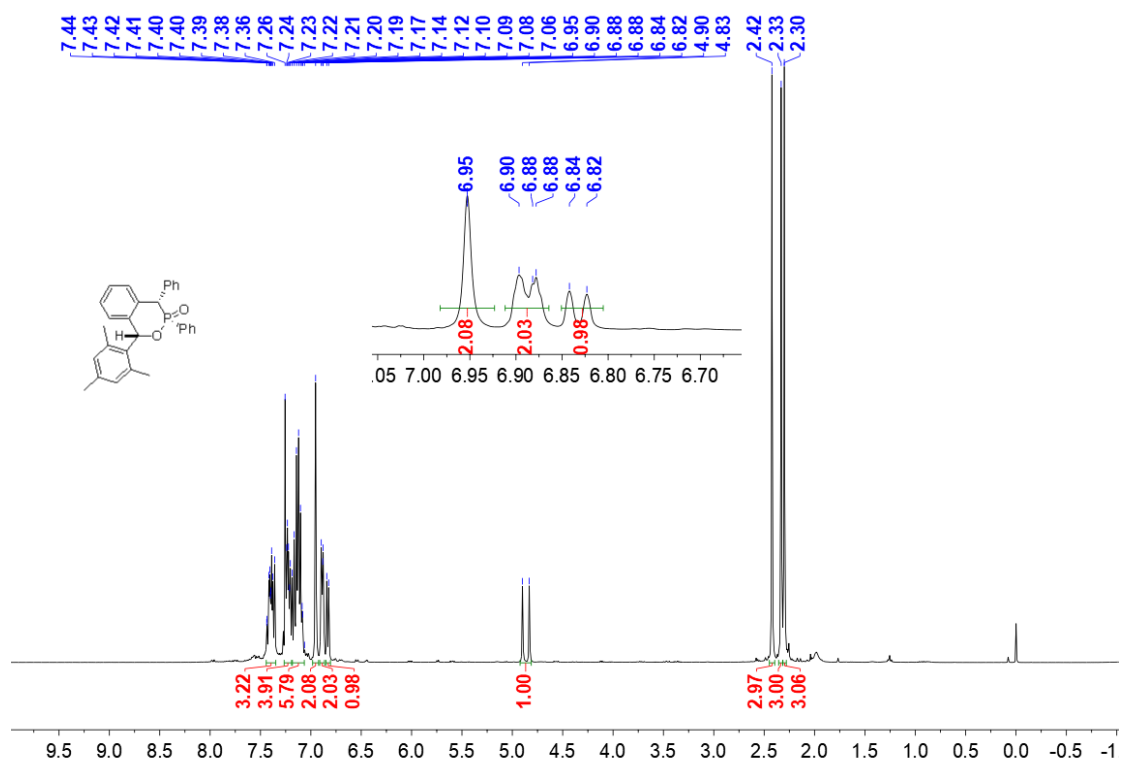

-37.24

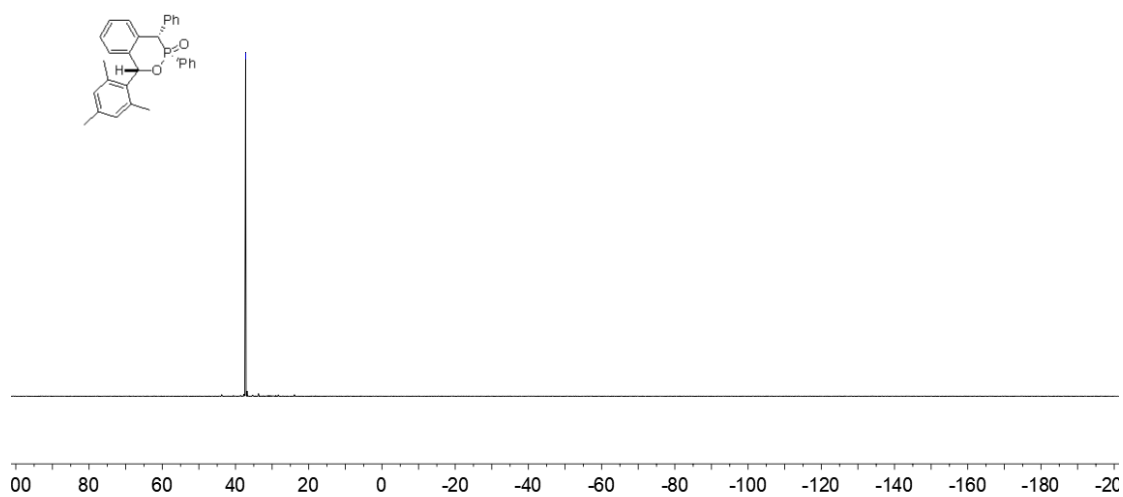



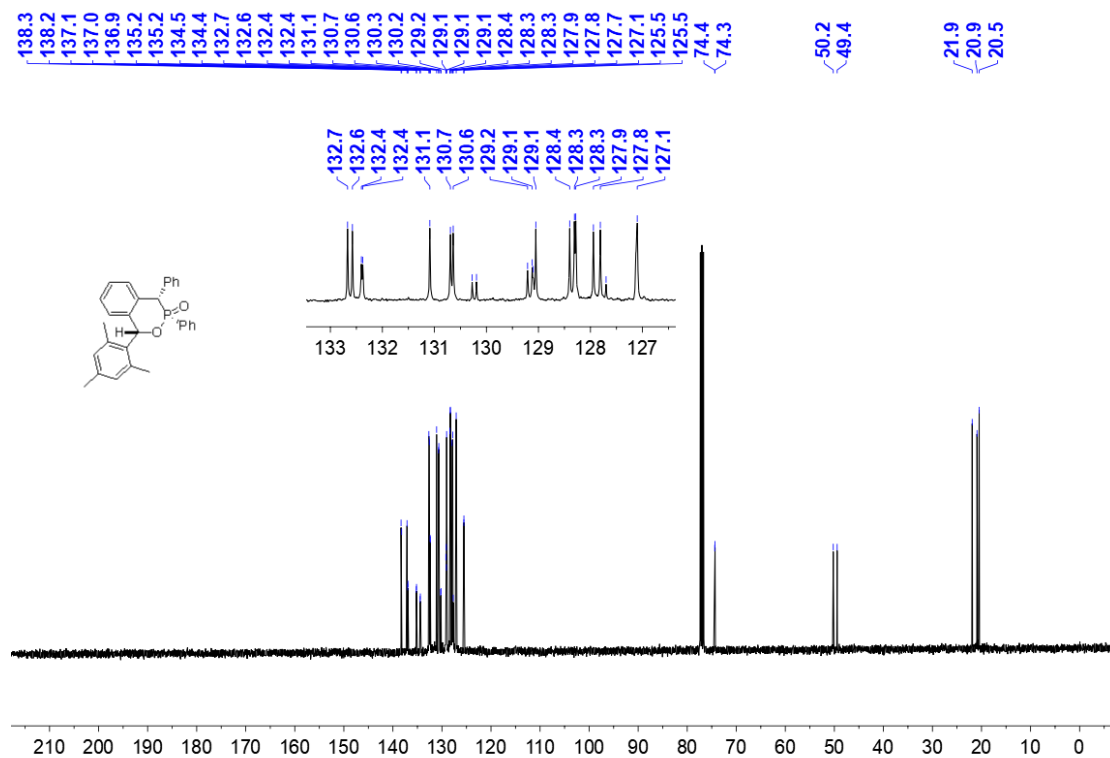

<sup>1</sup>H, <sup>31</sup>P and <sup>13</sup>C NMR spectra of compound **3v** in CDCl<sub>3</sub> (400 MHz)

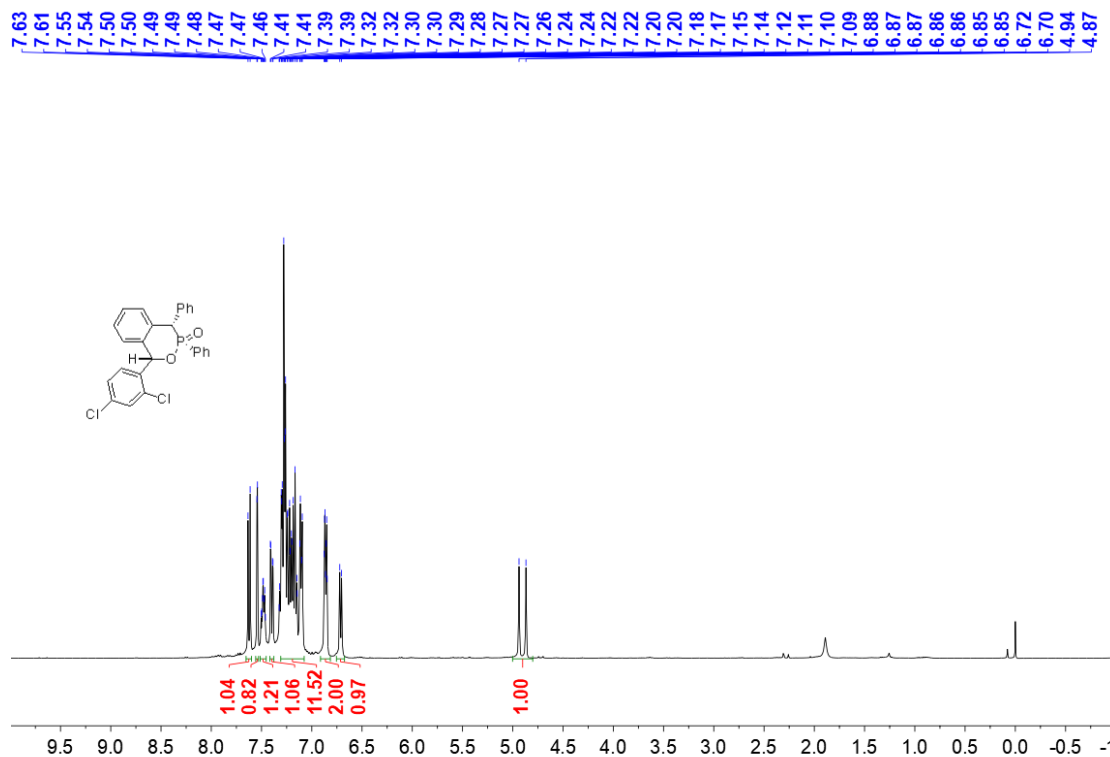

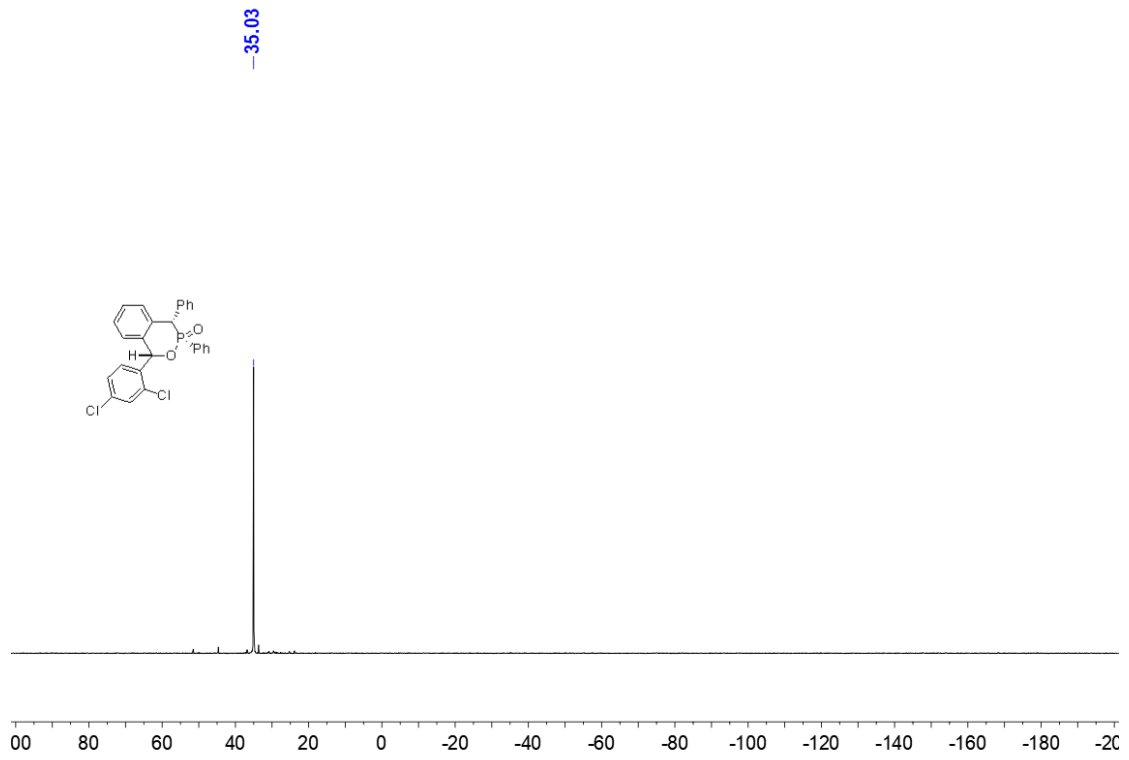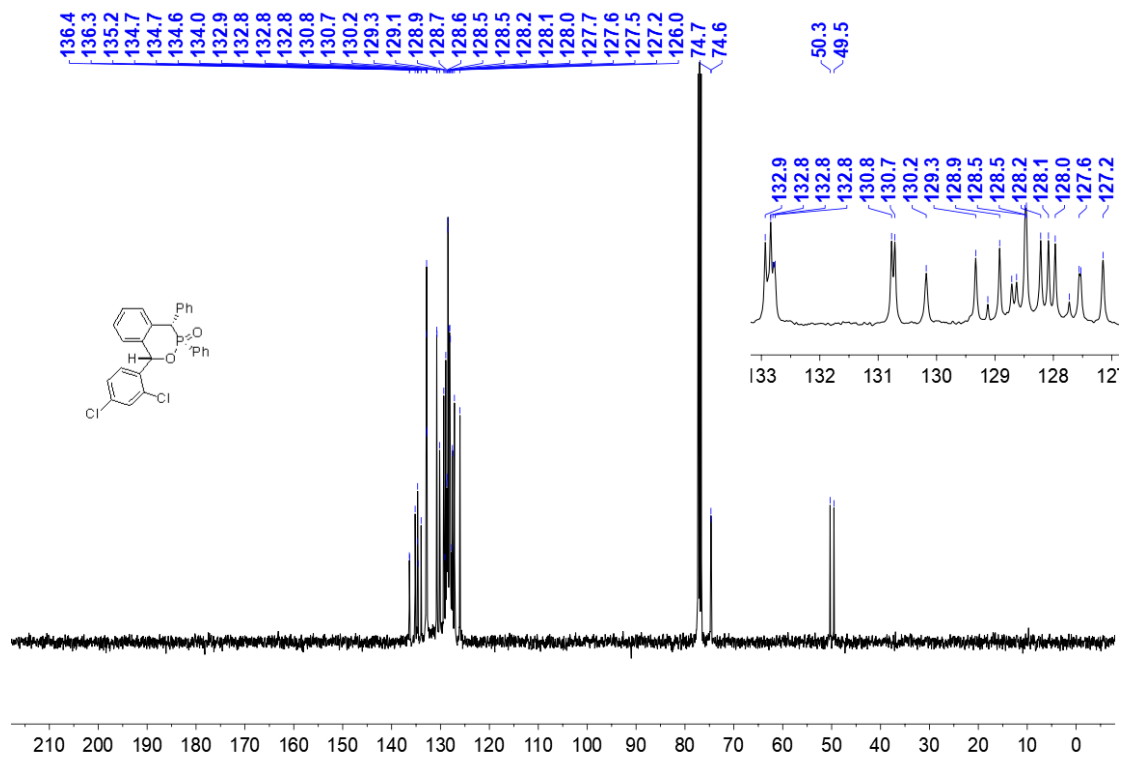

$^1\text{H}$ ,  $^{31}\text{P}$  and  $^{13}\text{C}$  NMR spectra of compound **3w** in  $\text{CDCl}_3$  (400 MHz)

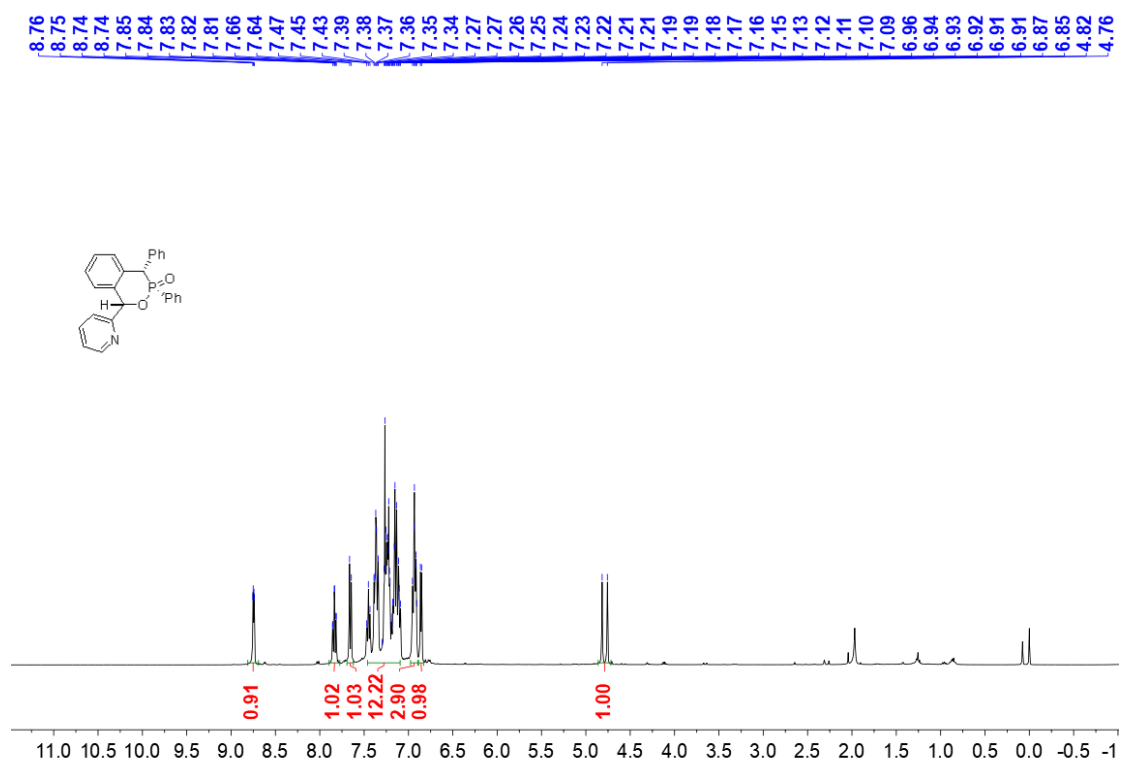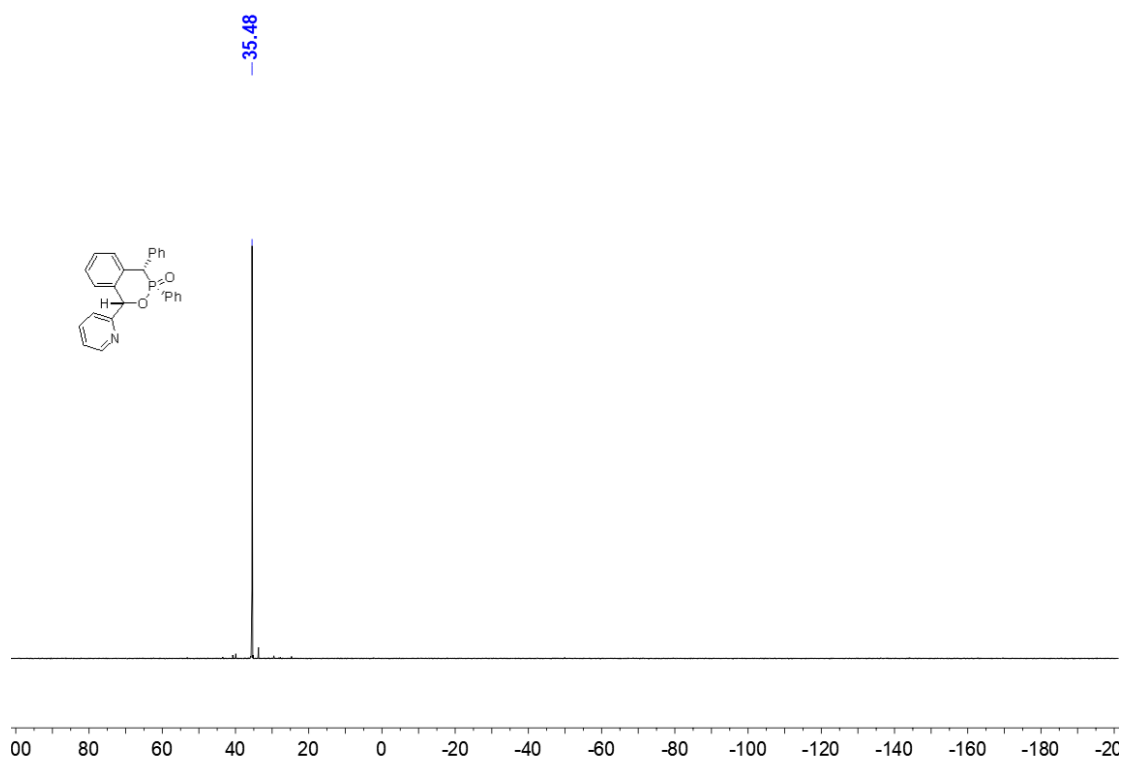

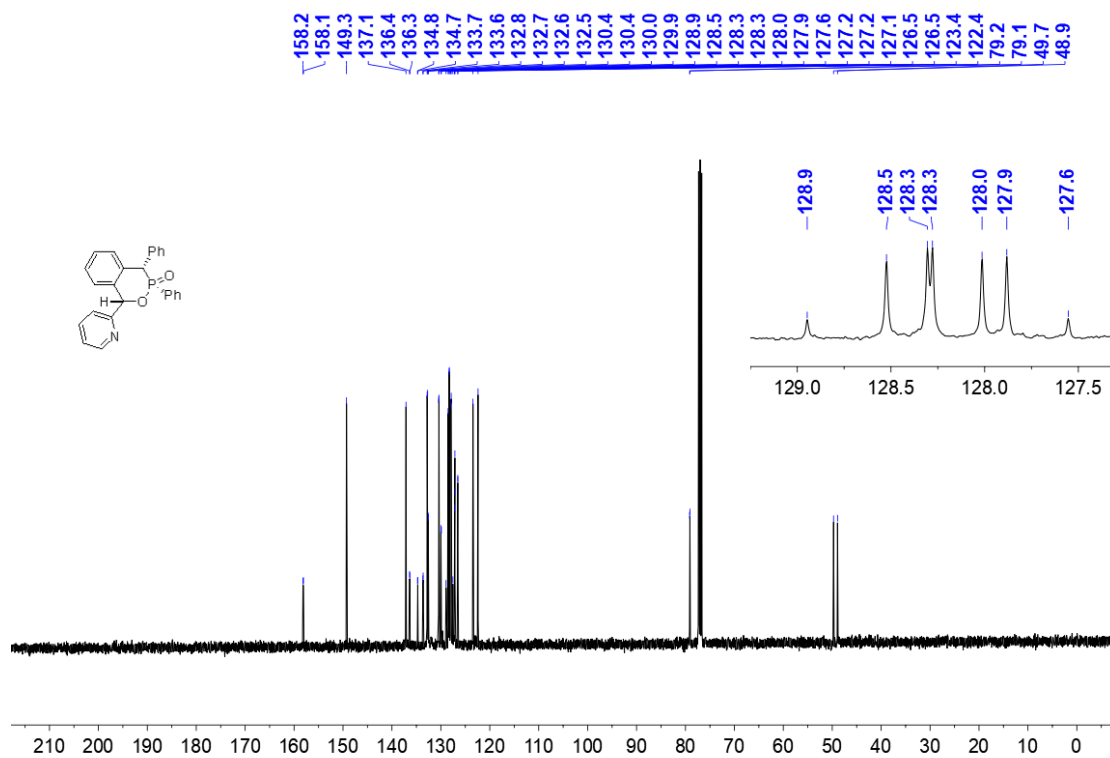

<sup>1</sup>H, <sup>31</sup>P and <sup>13</sup>C NMR spectra of compound **3z** in CDCl<sub>3</sub> (400 MHz)

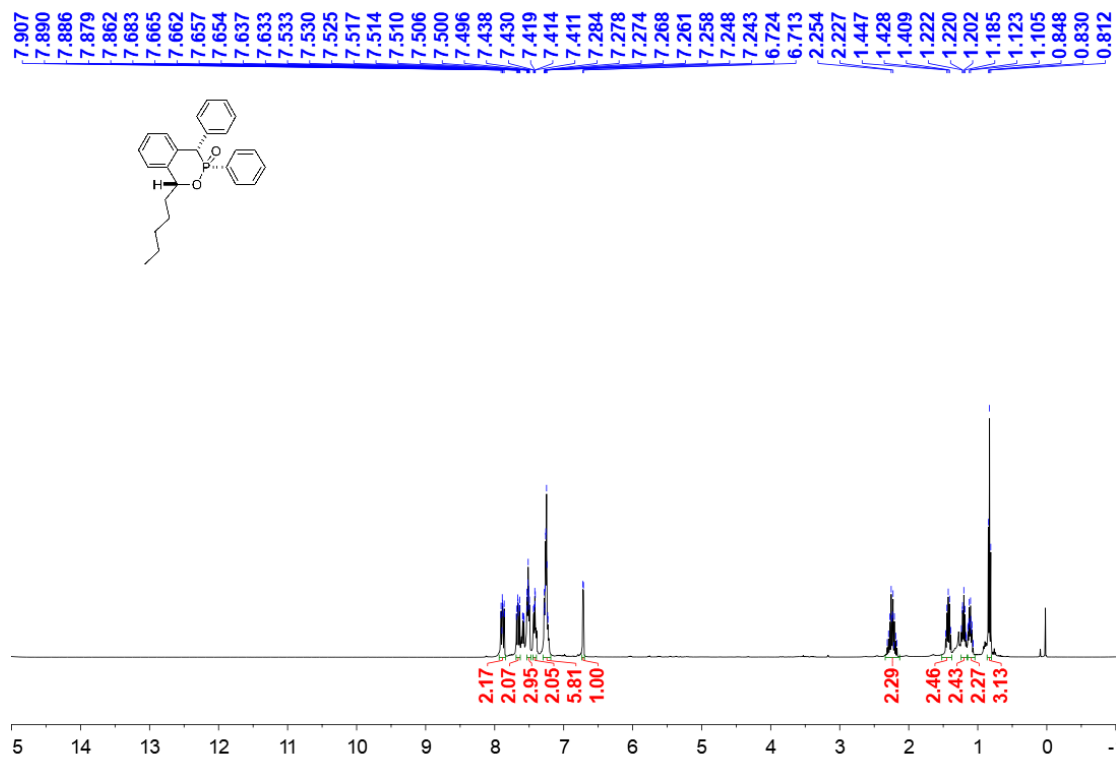

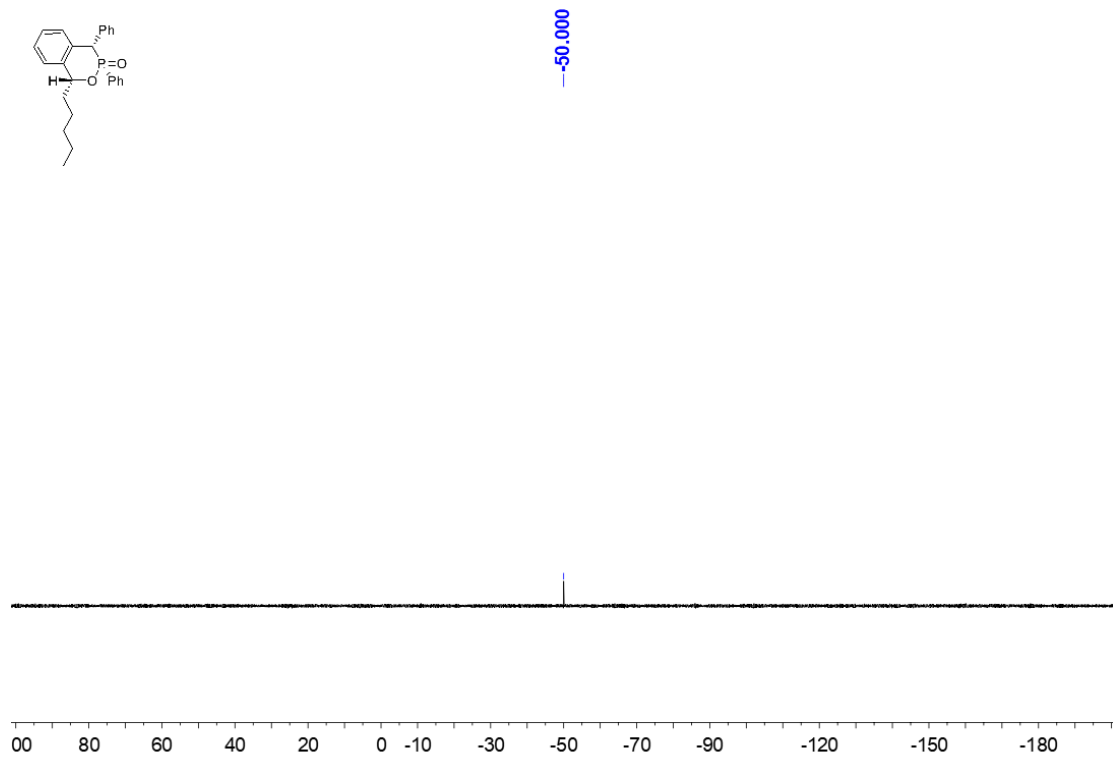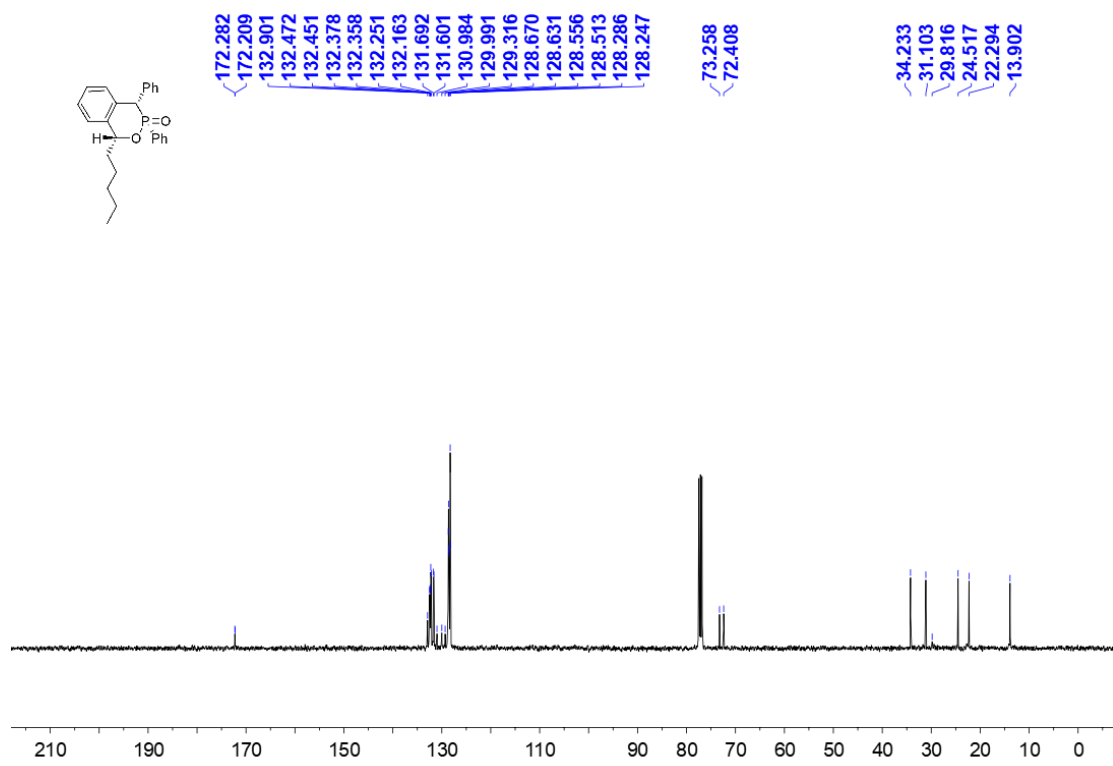

$^1\text{H}$ ,  $^{31}\text{P}$  and  $^{13}\text{C}$  NMR spectra of compound **3aa** in  $\text{CDCl}_3$  (400 MHz)

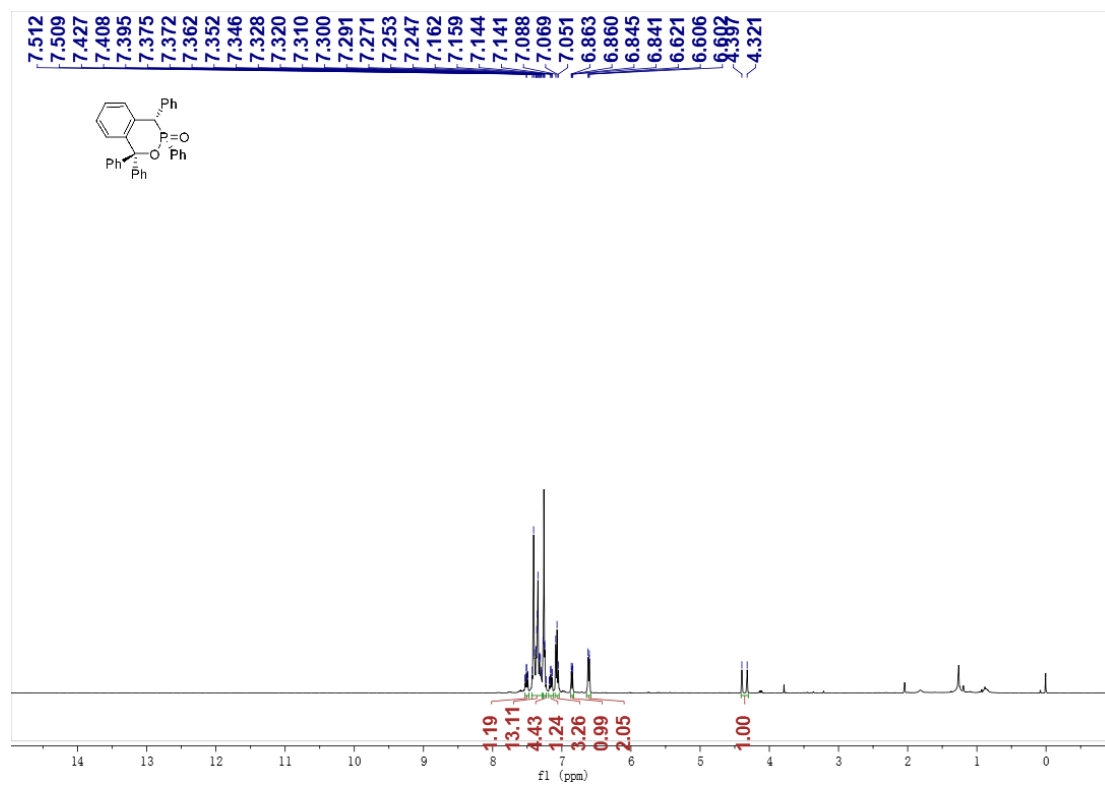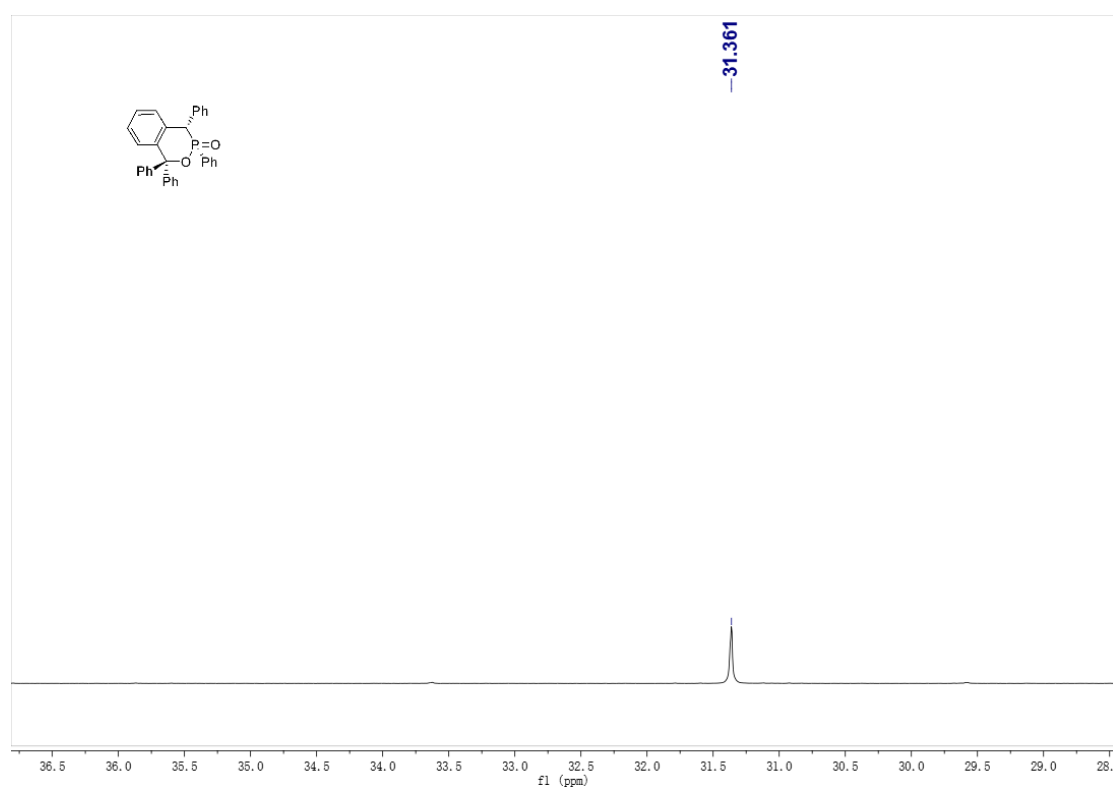

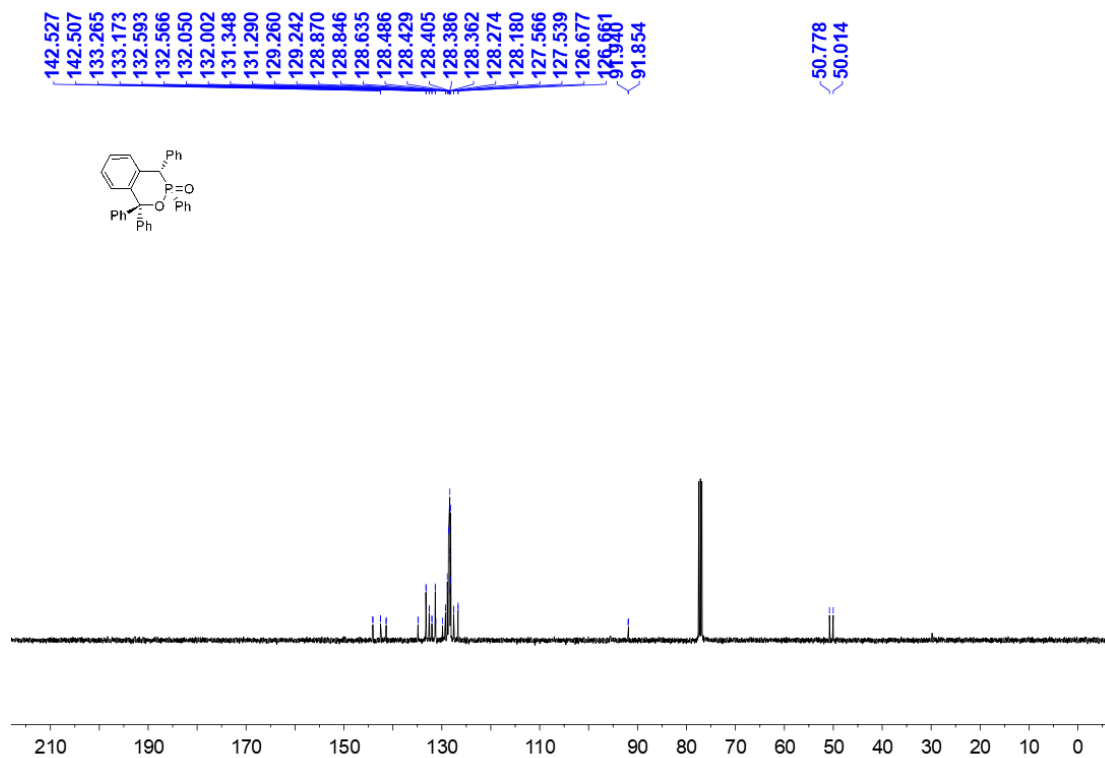

<sup>1</sup>H, <sup>31</sup>P and <sup>13</sup>C NMR spectra of compound **3ab** in CDCl<sub>3</sub> (400 MHz)

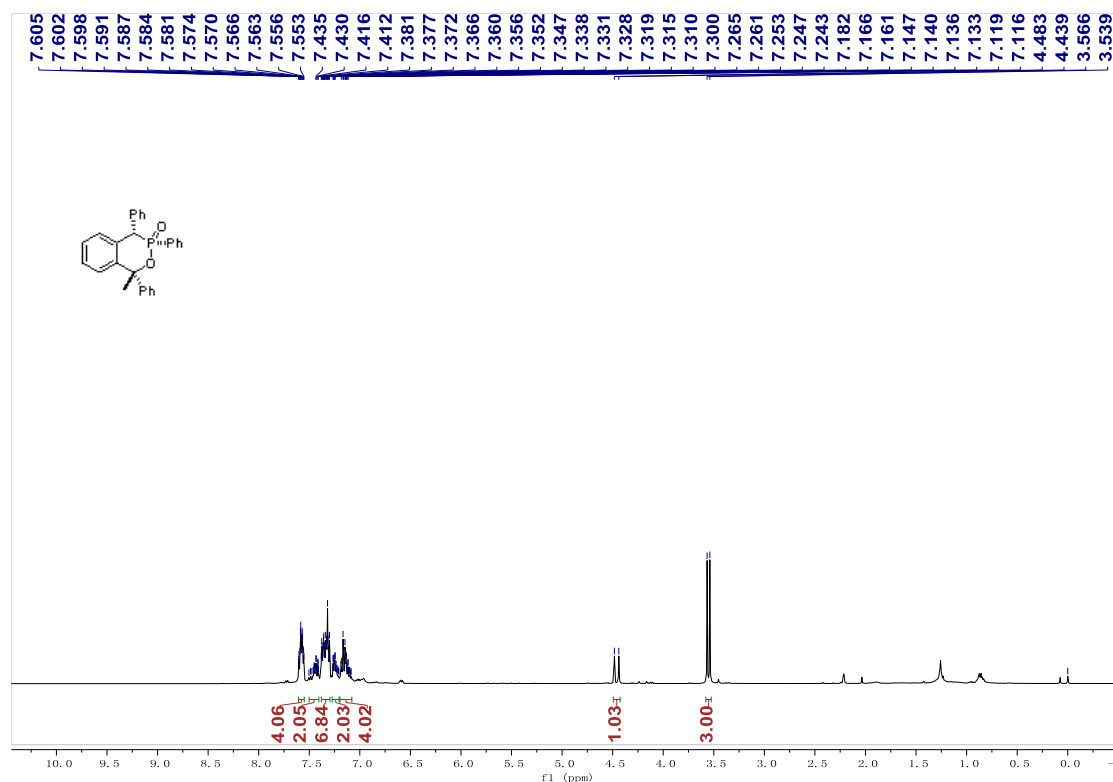

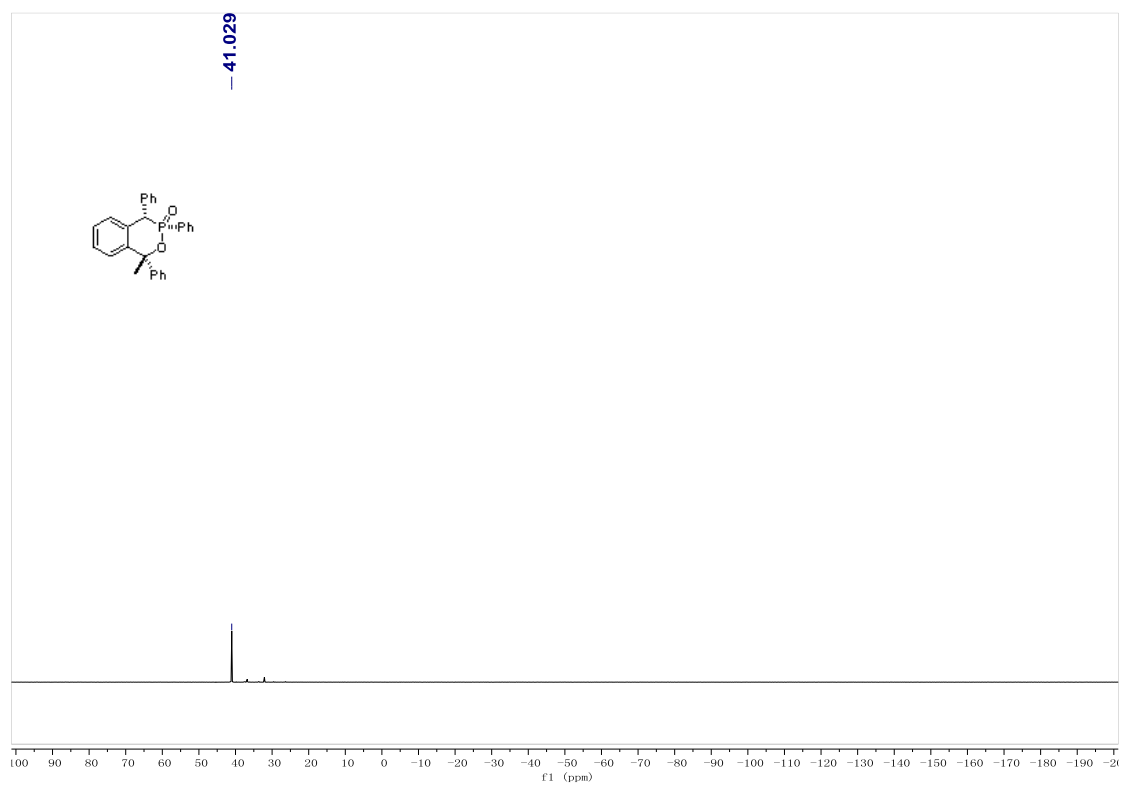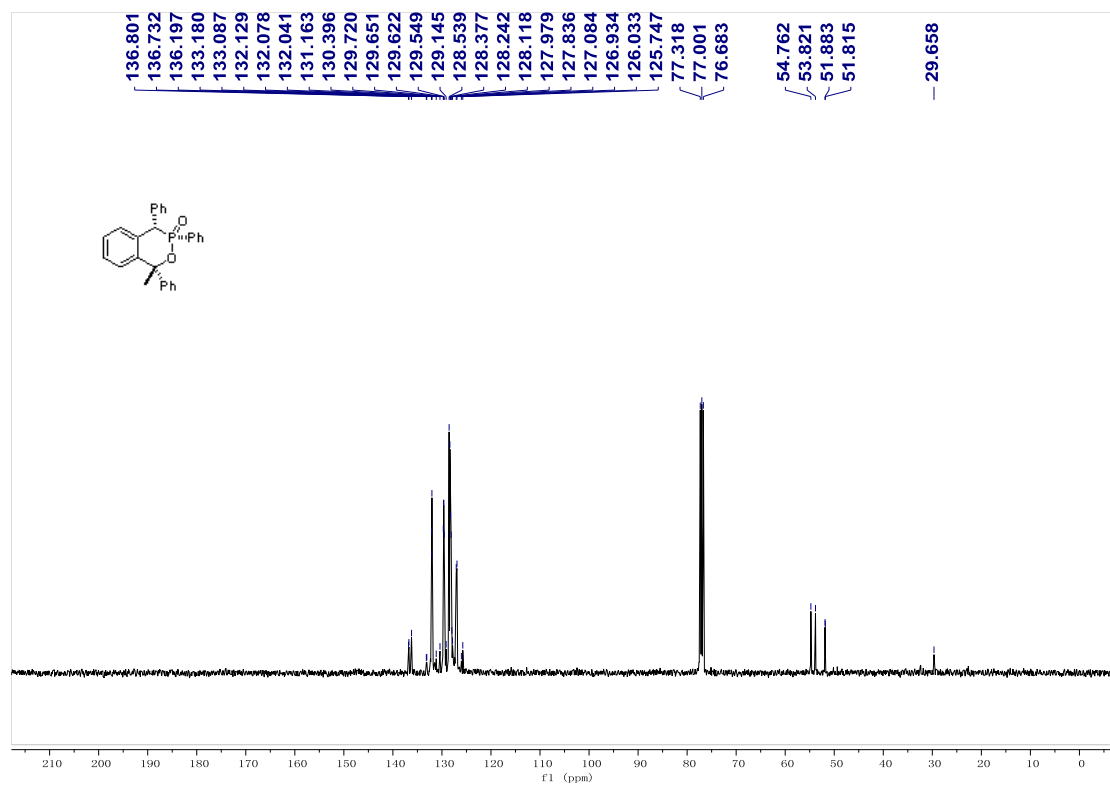



$^1\text{H}$ ,  $^{31}\text{P}$  and  $^{13}\text{C}$  NMR spectra of compound **3ad'** in  $\text{CDCl}_3$  (400 MHz)

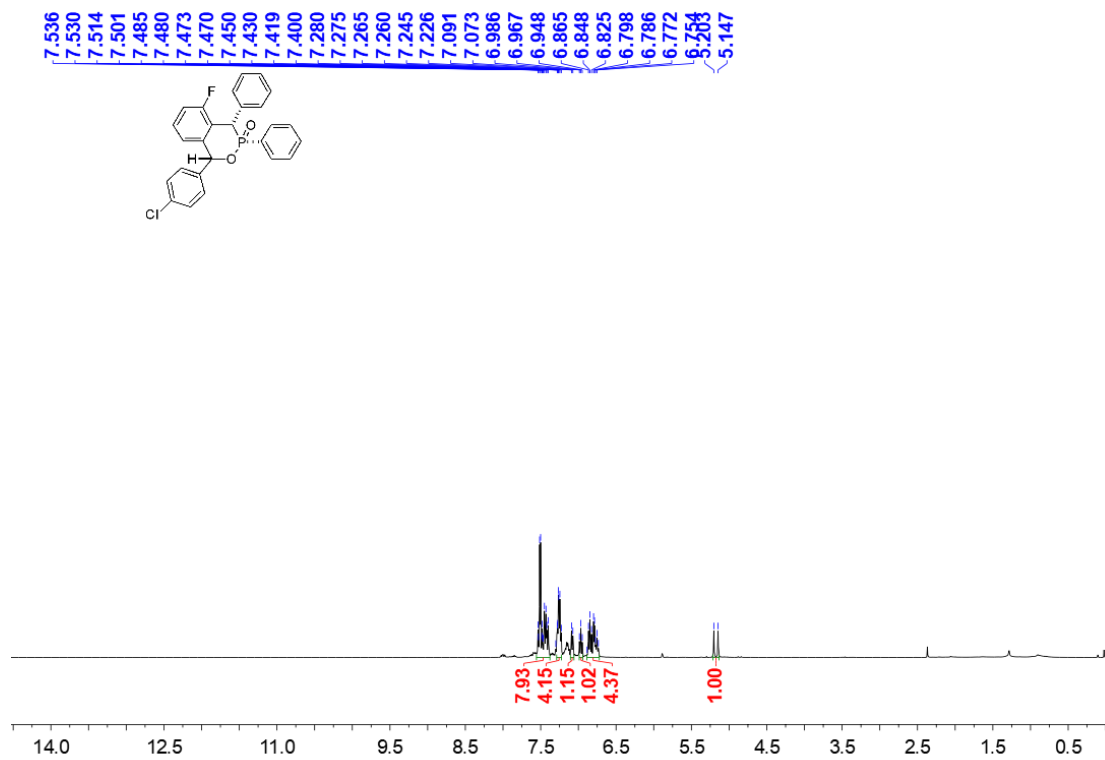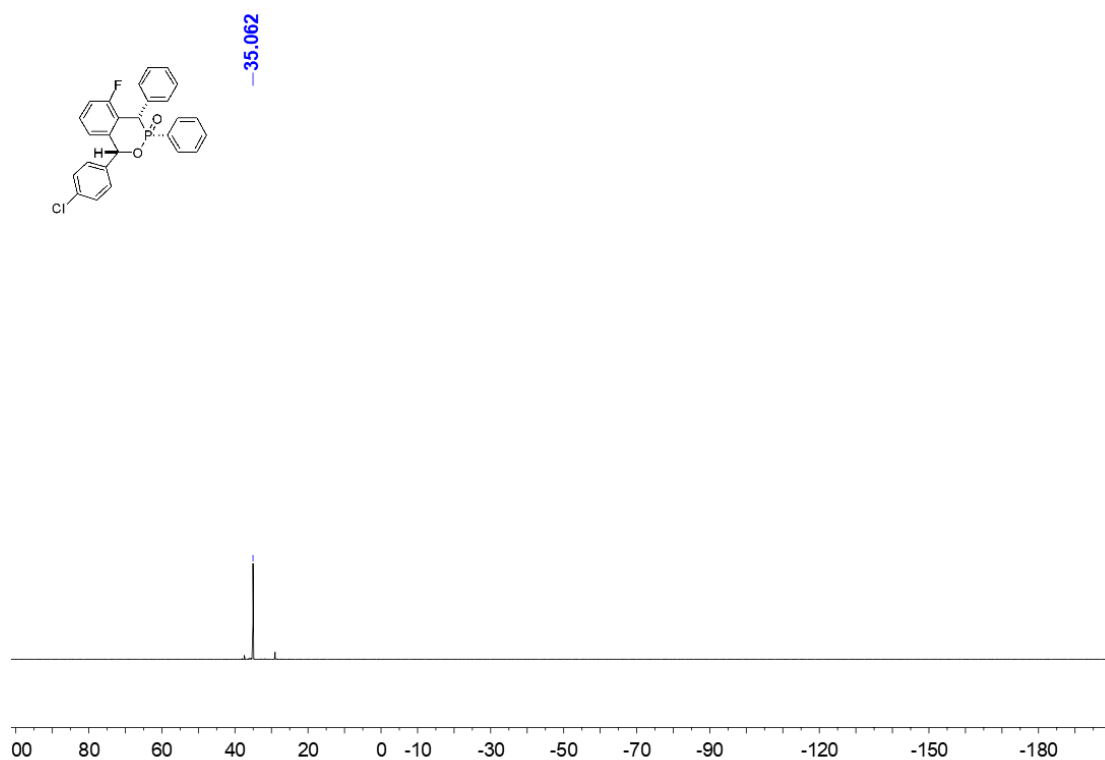

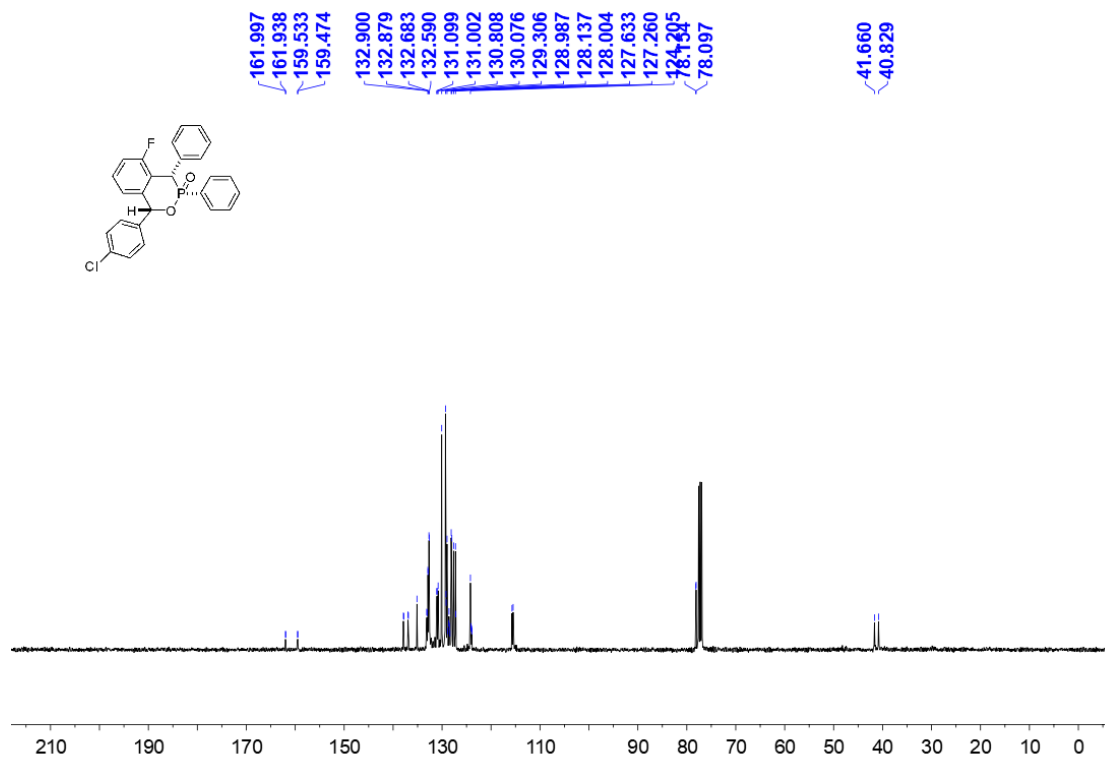

<sup>1</sup>H, <sup>31</sup>P and <sup>13</sup>C NMR spectra of compound **3ae** and **3ae'** in CDCl<sub>3</sub> (400 MHz)

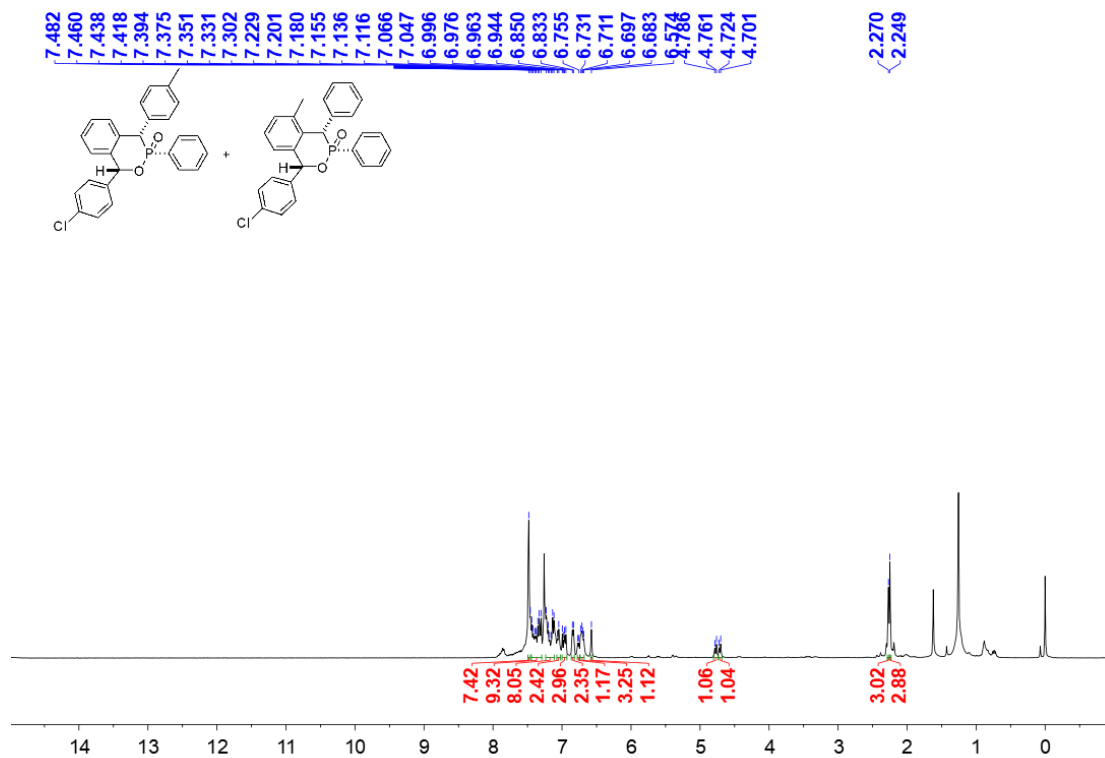

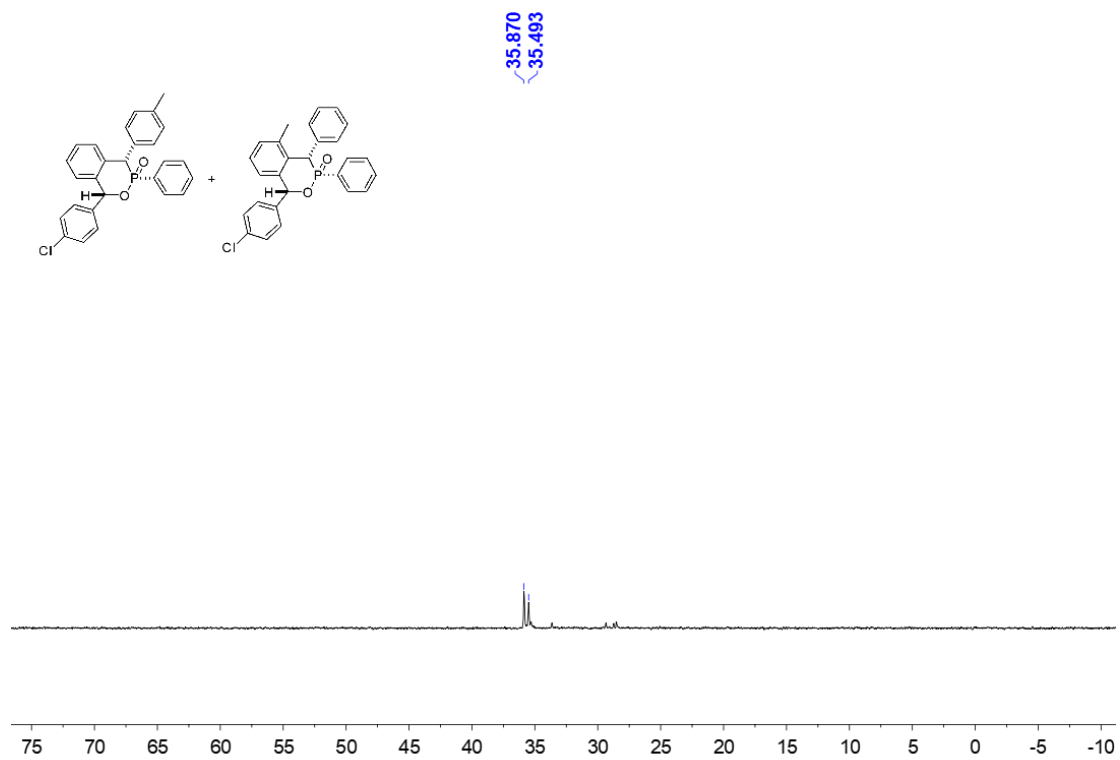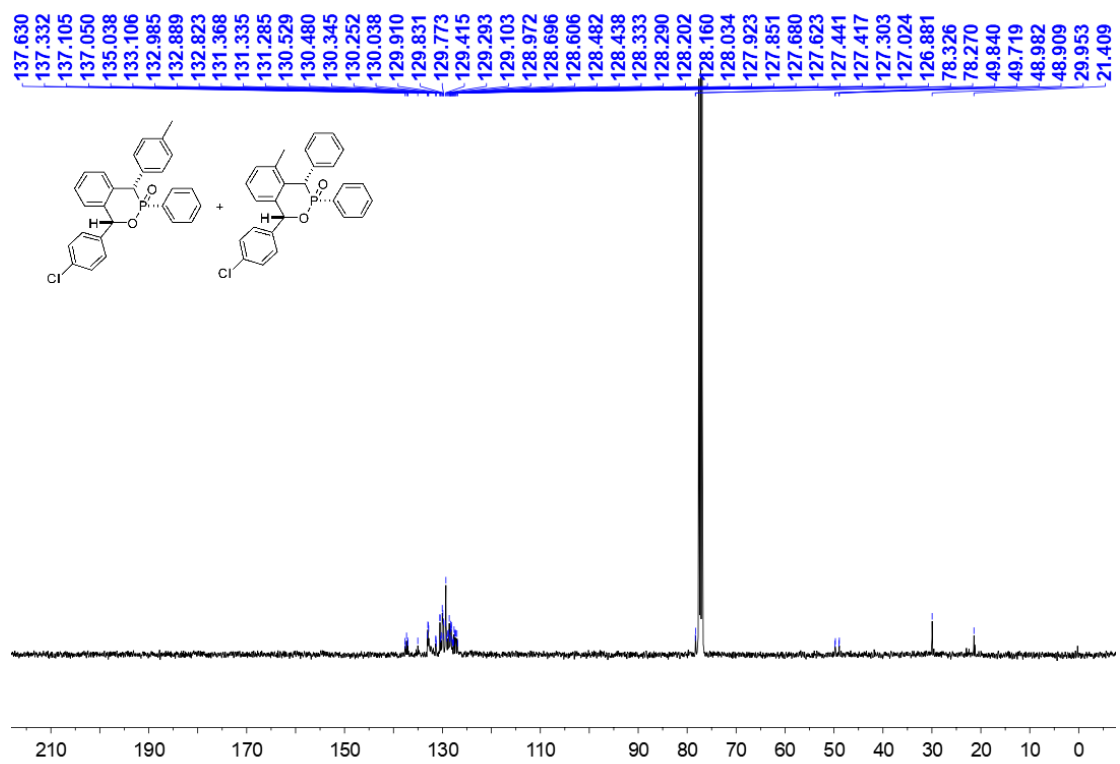

$^1\text{H}$ ,  $^{31}\text{P}$  and  $^{13}\text{C}$  NMR spectra of compound **3ag** and **3ag'** in  $\text{CDCl}_3$  (400 MHz)

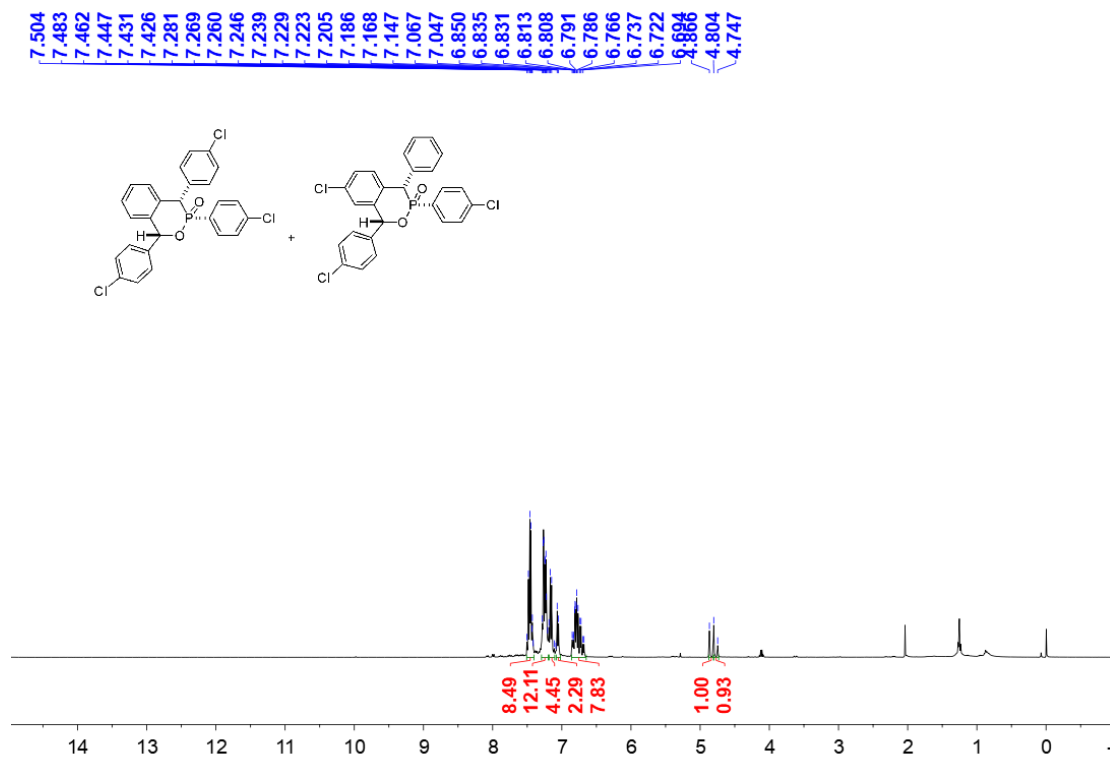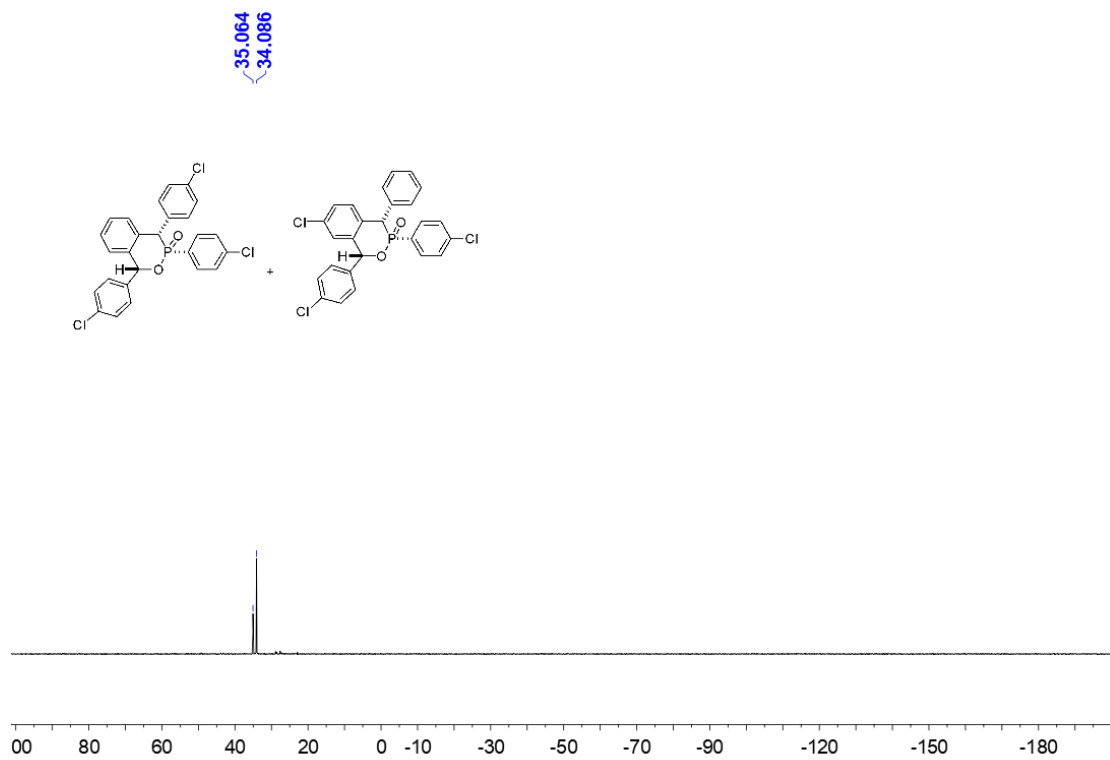

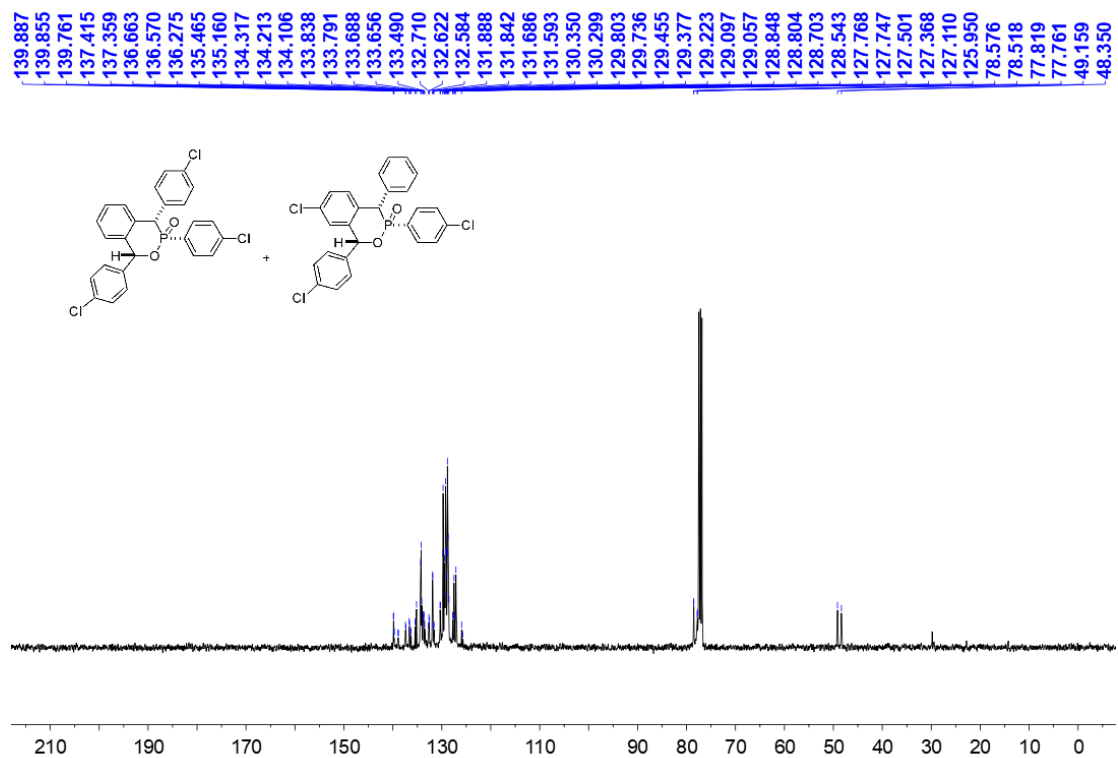

$^1\text{H}$ ,  $^{31}\text{P}$  and  $^{13}\text{C}$  NMR spectra of compound **5** in  $\text{CDCl}_3$  (400 MHz)

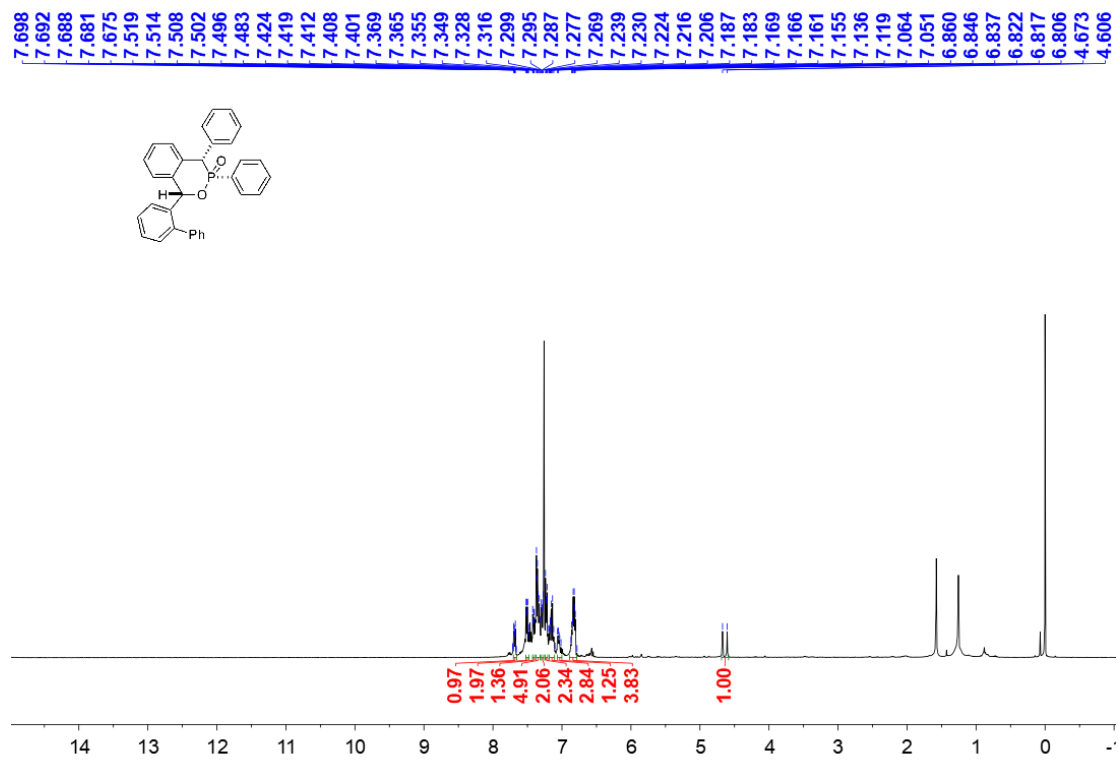

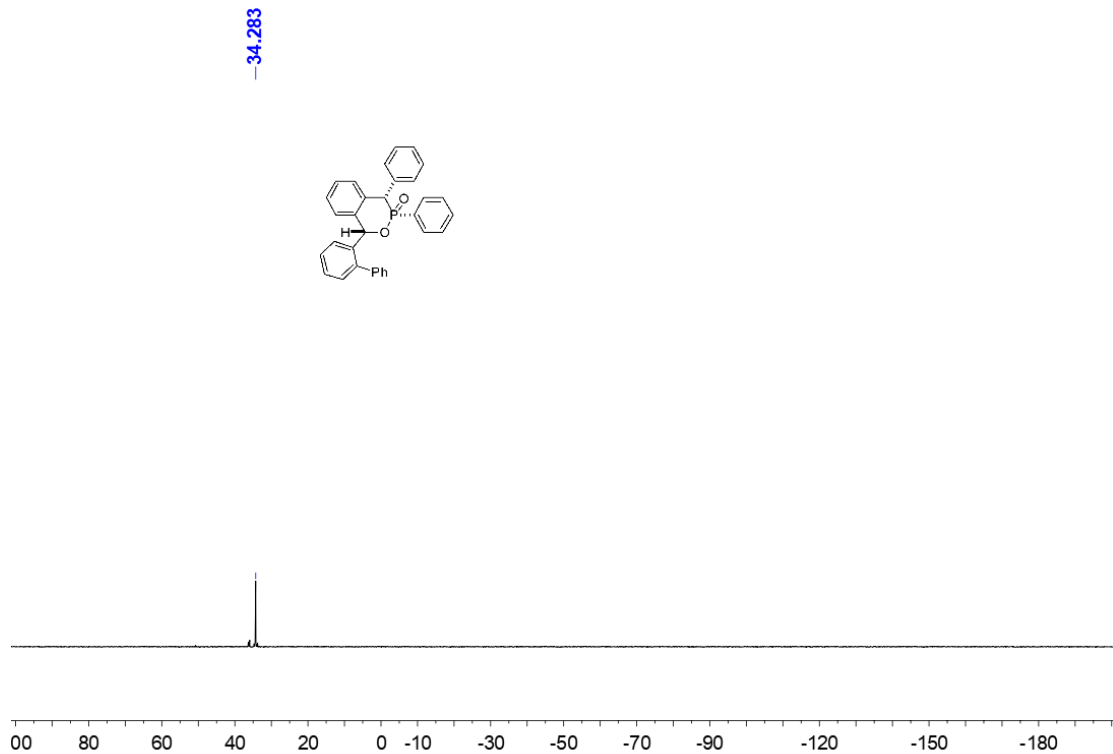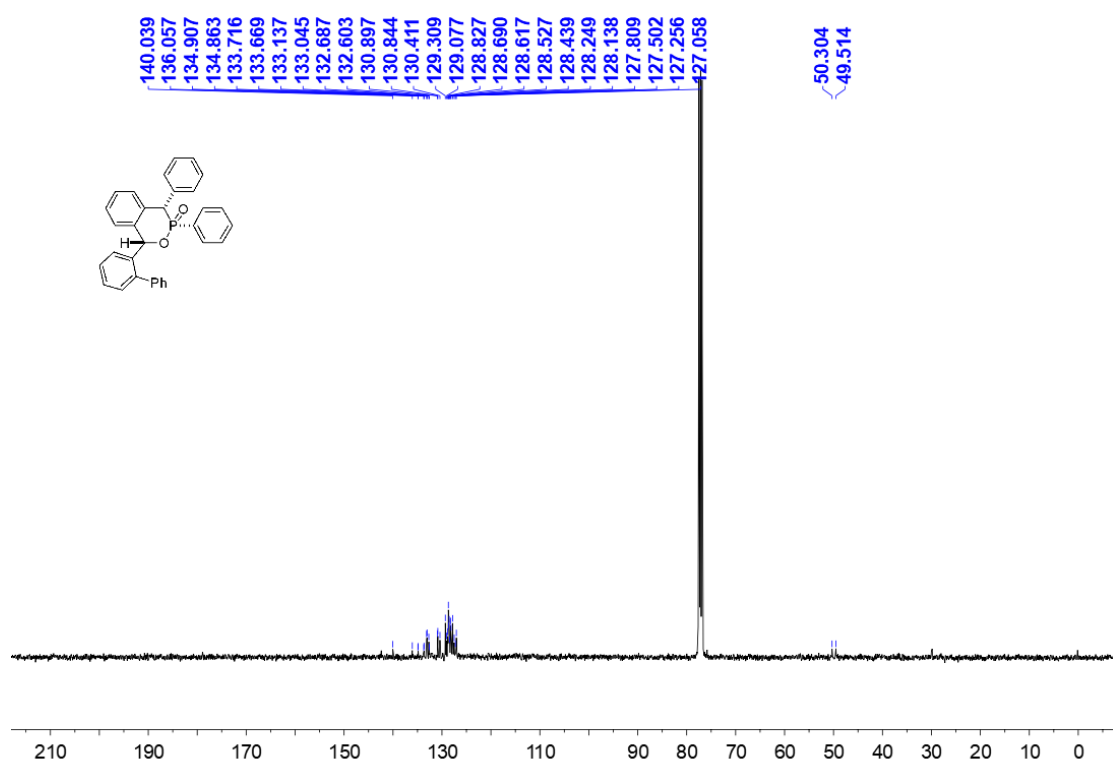

$^1\text{H}$  and  $^{13}\text{C}$  NMR spectra of compound **4a** in  $\text{CDCl}_3$  (400 MHz)

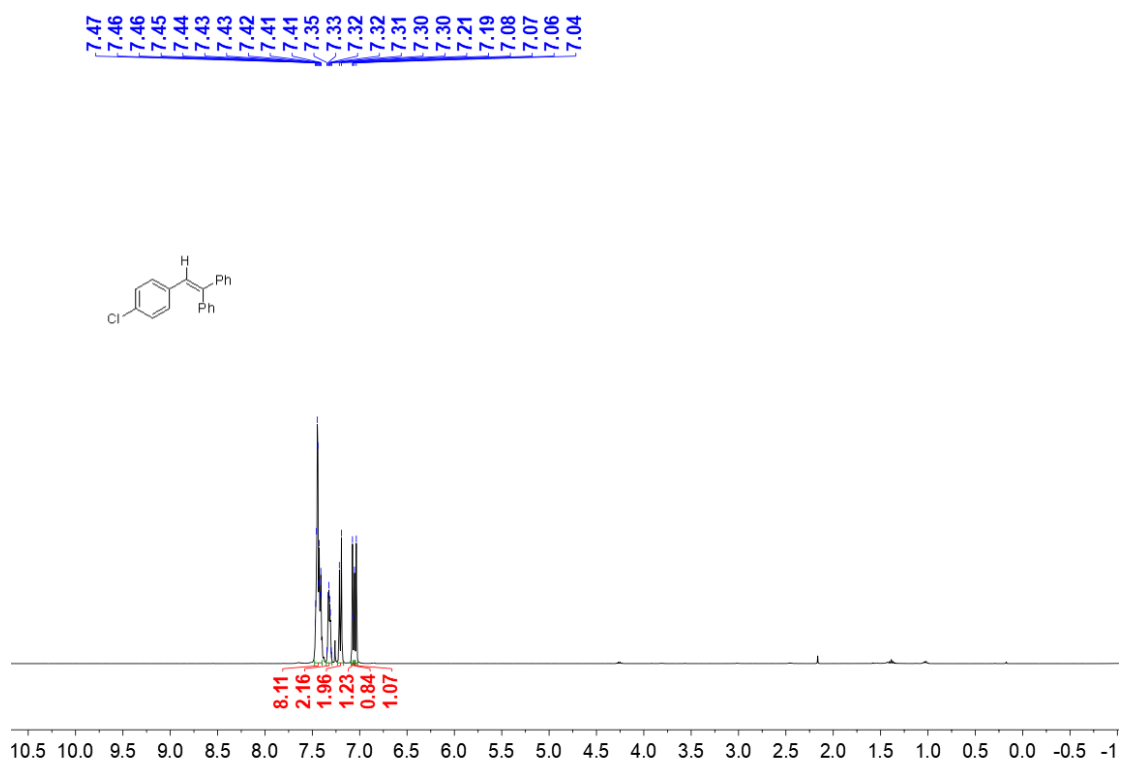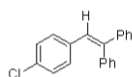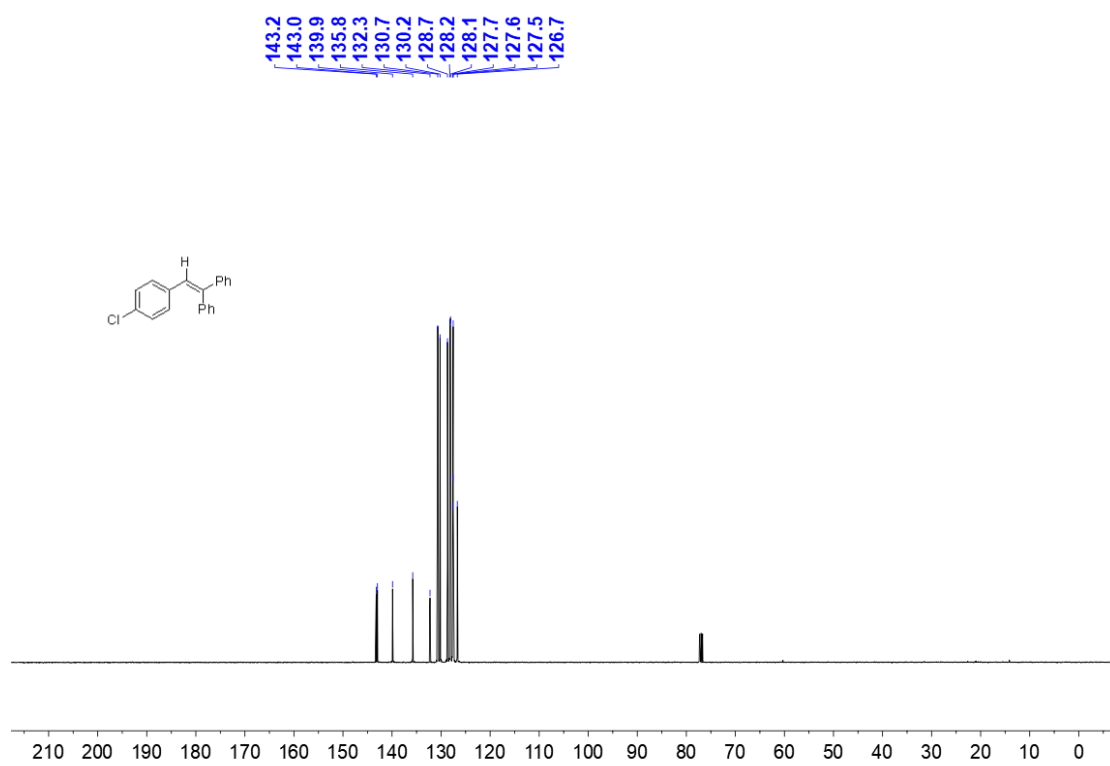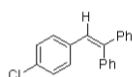

$^1\text{H}$  and  $^{13}\text{C}$  NMR spectra of compound **4b** in  $\text{CDCl}_3$  (400 MHz)

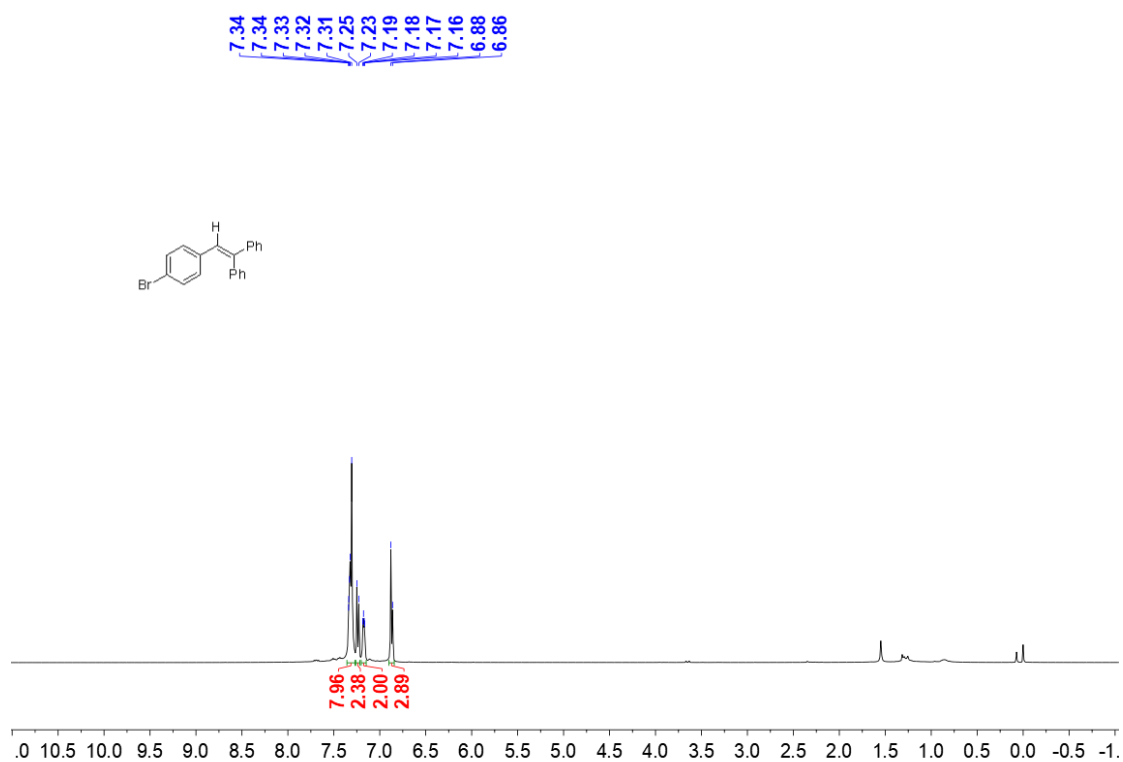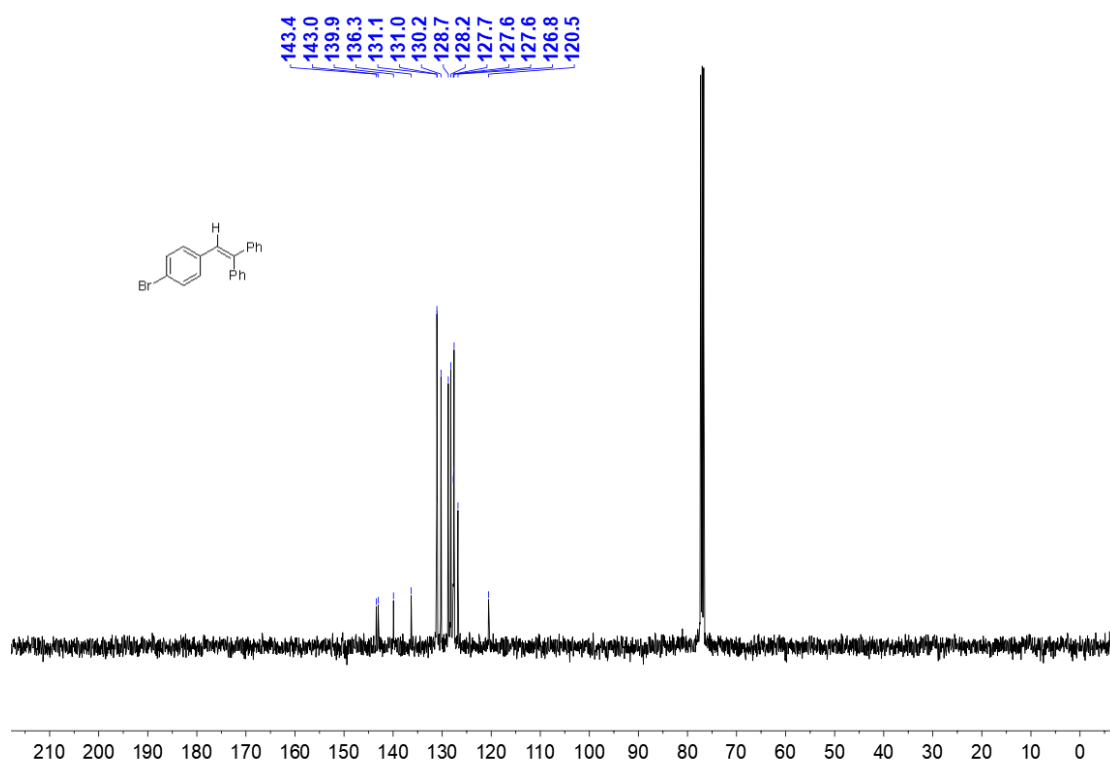



$^1\text{H}$  and  $^{13}\text{C}$  NMR spectra of compound **4c** in  $\text{CDCl}_3$  (400 MHz)

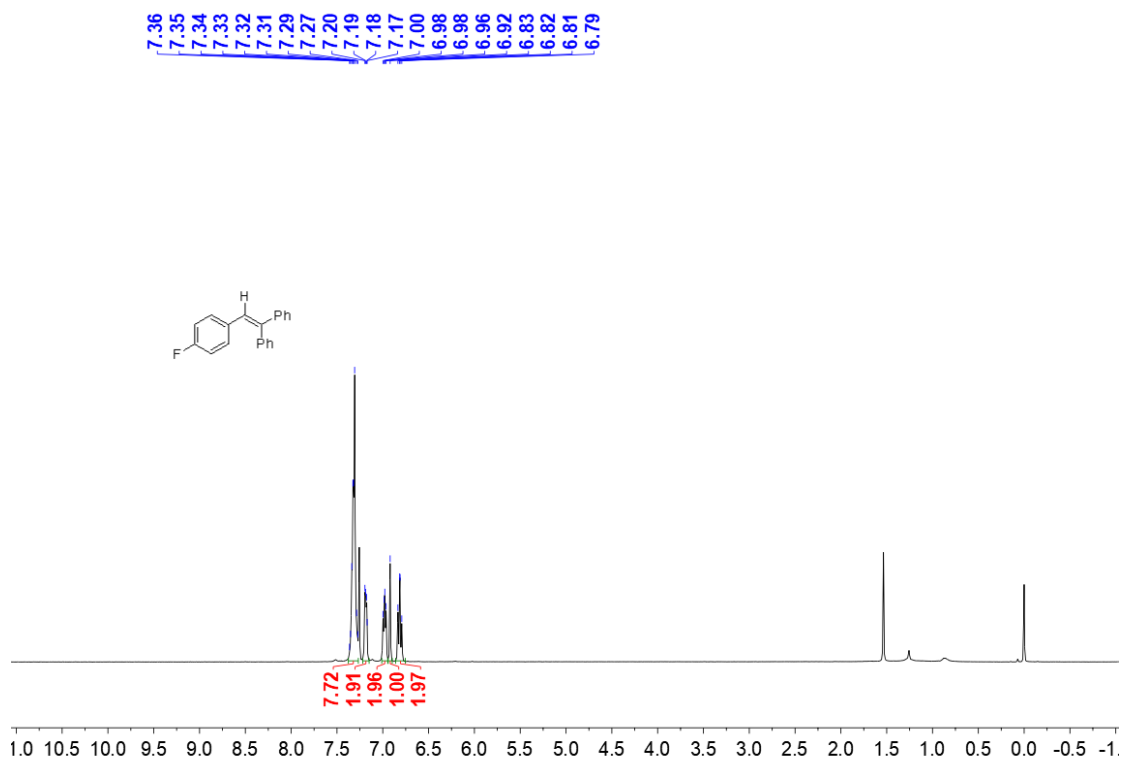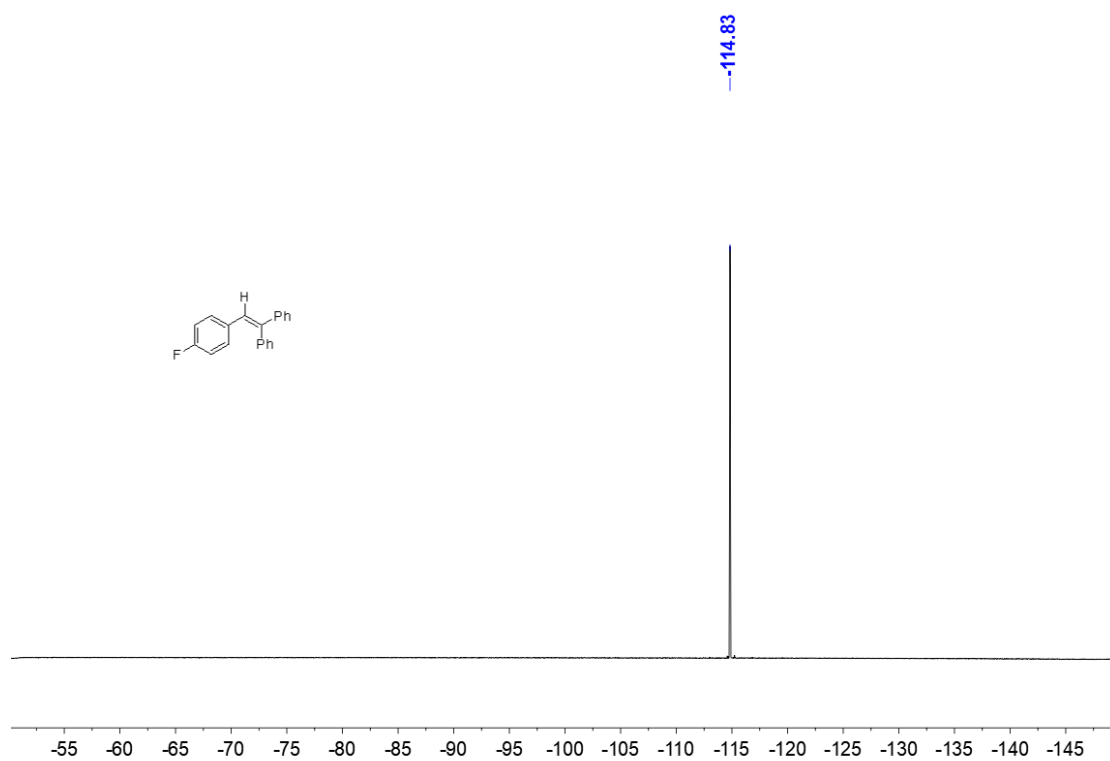

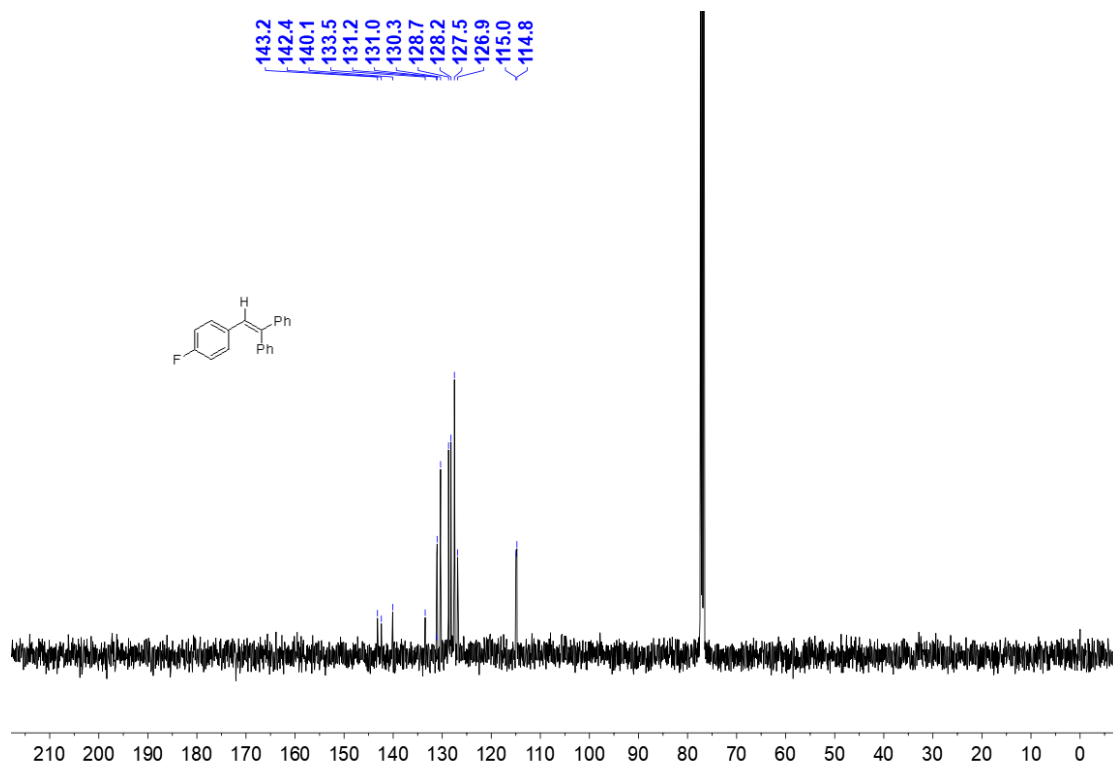

$^1\text{H}$  and  $^{13}\text{C}$  NMR spectra of compound **4d** in  $\text{CDCl}_3$  (400 MHz)

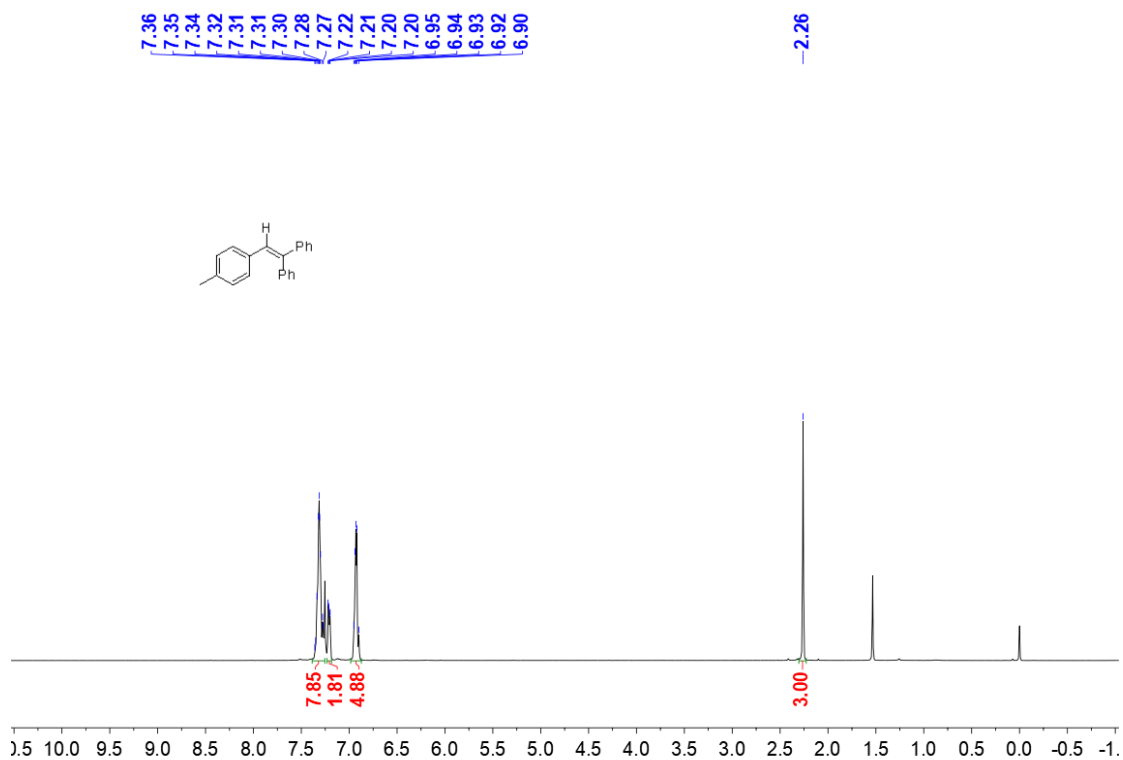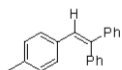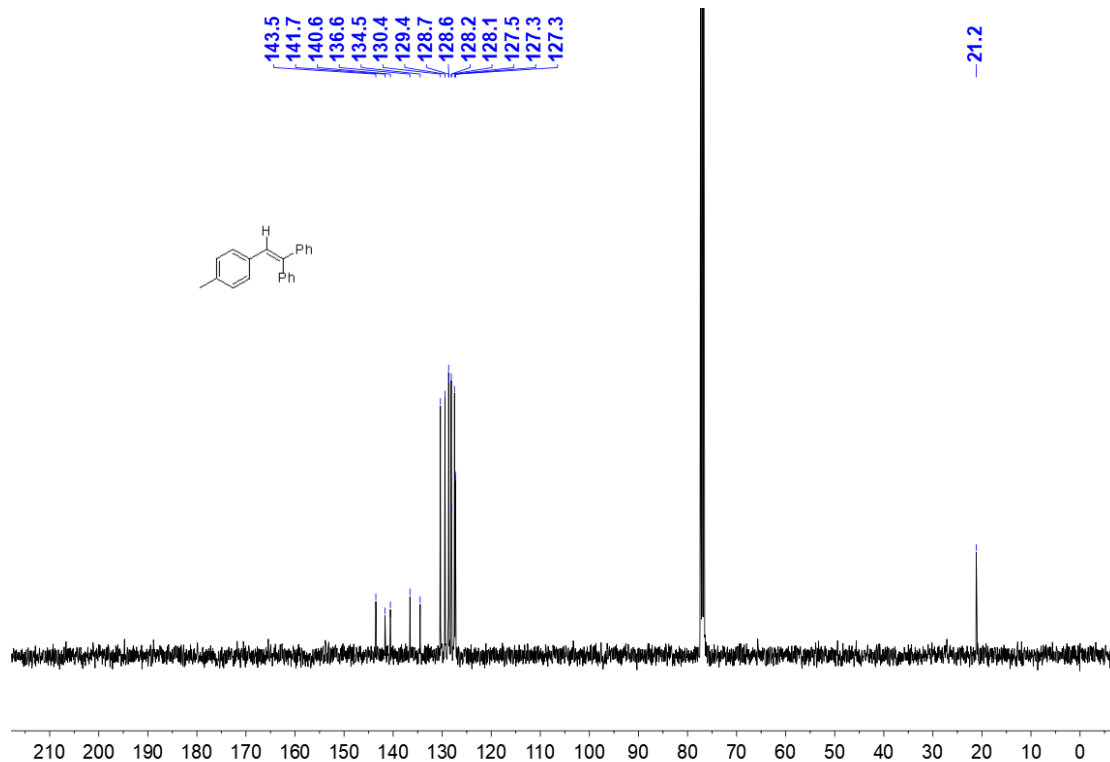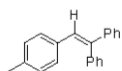

$^1\text{H}$  and  $^{13}\text{C}$  NMR spectra of compound **4f** in  $\text{CDCl}_3$  (400 MHz)

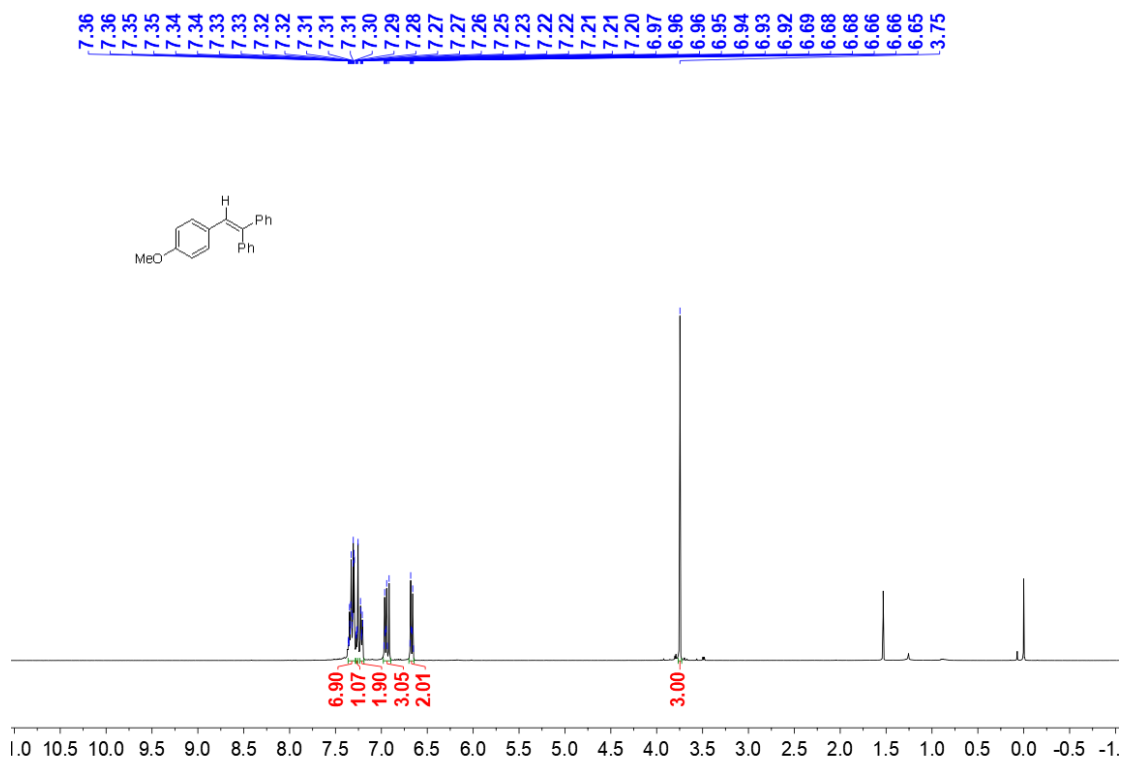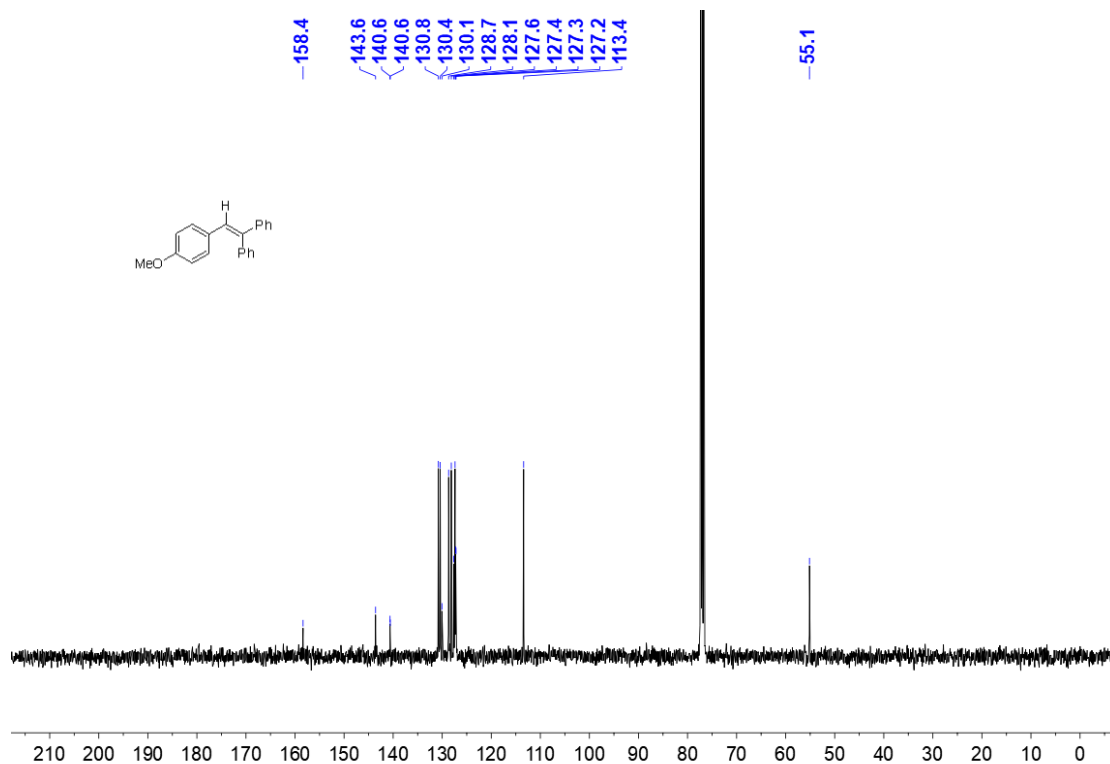

$^1\text{H}$  and  $^{13}\text{C}$  NMR spectra of compound **4g** in  $\text{CDCl}_3$  (400 MHz)

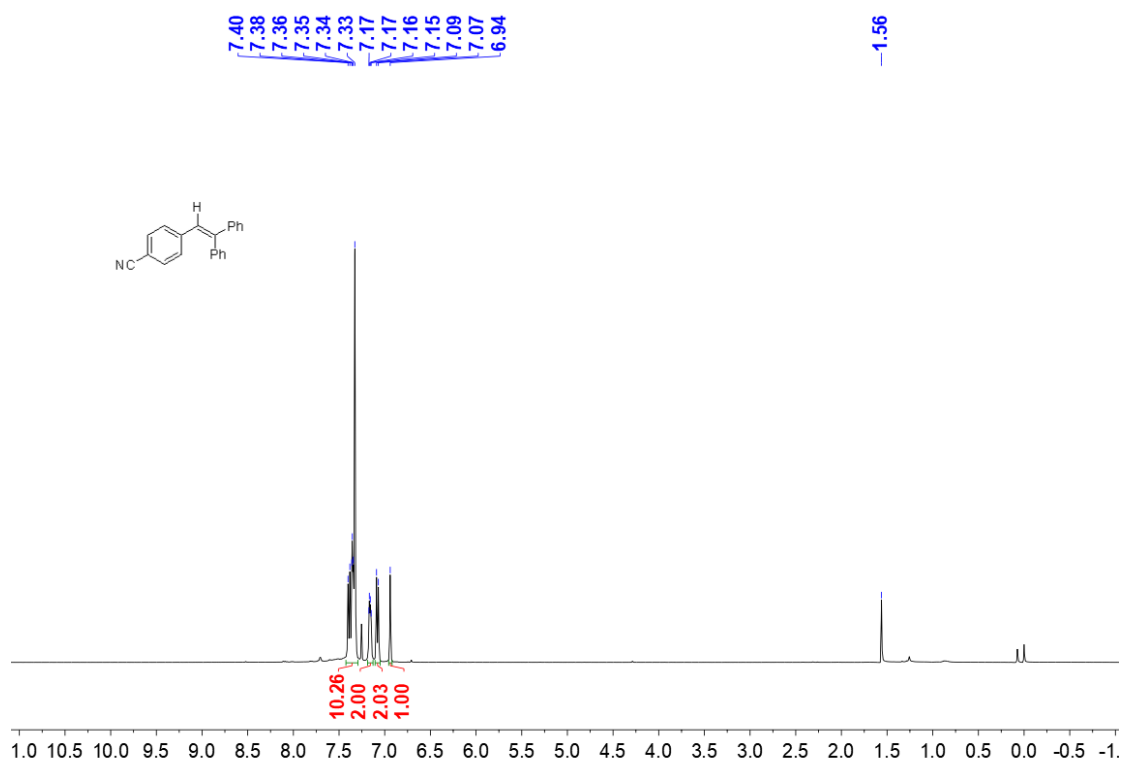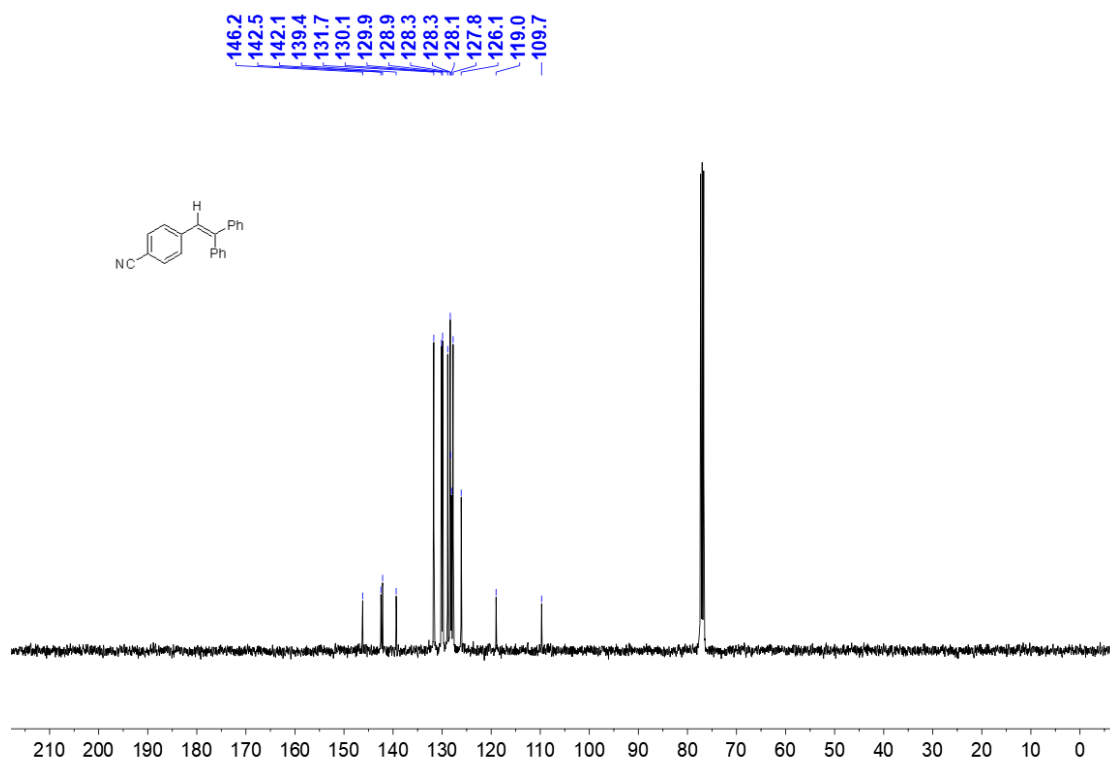

$^1\text{H}$  and  $^{13}\text{C}$  NMR spectra of compound **4h** in  $\text{CDCl}_3$  (400 MHz)

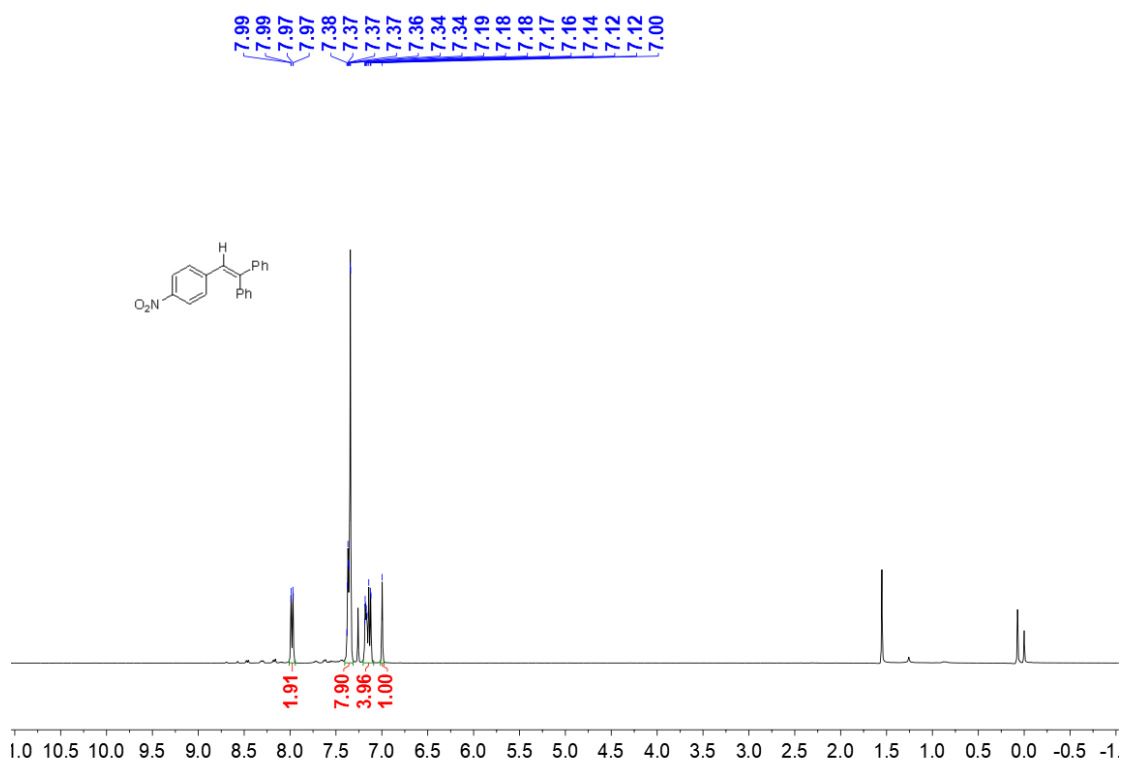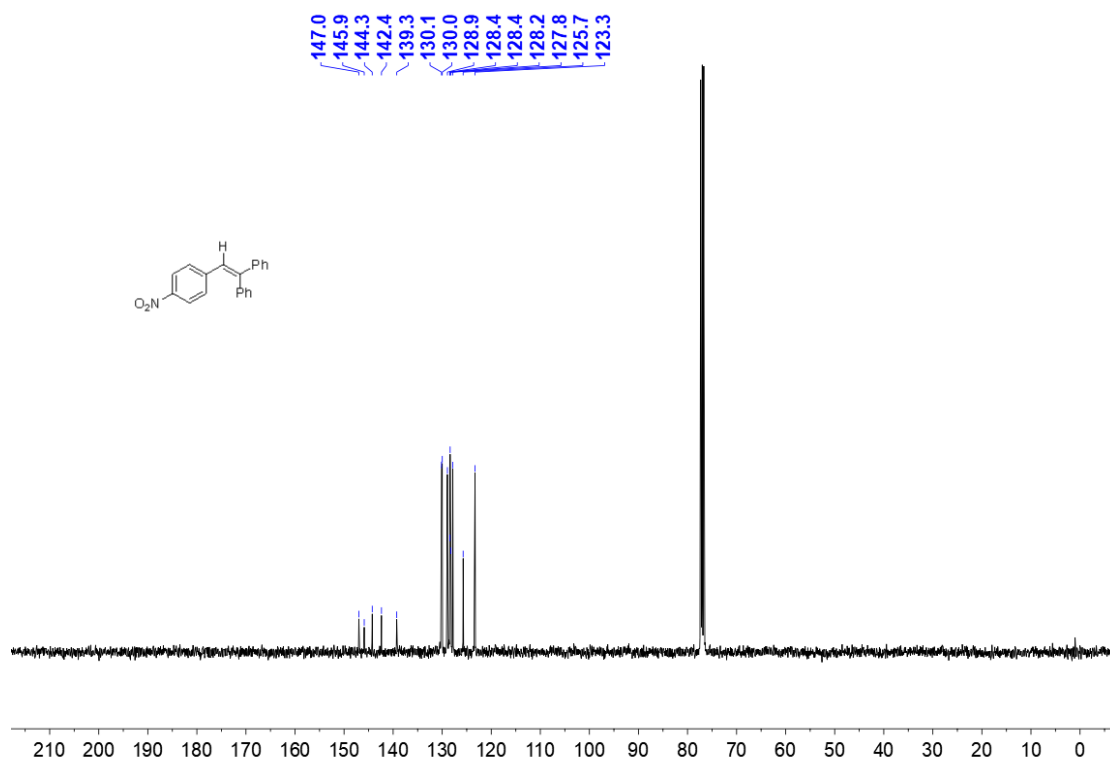

$^1\text{H}$ ,  $^{19}\text{F}$  and  $^{13}\text{C}$  NMR spectra of compound **4i** in  $\text{CDCl}_3$  (400 MHz)

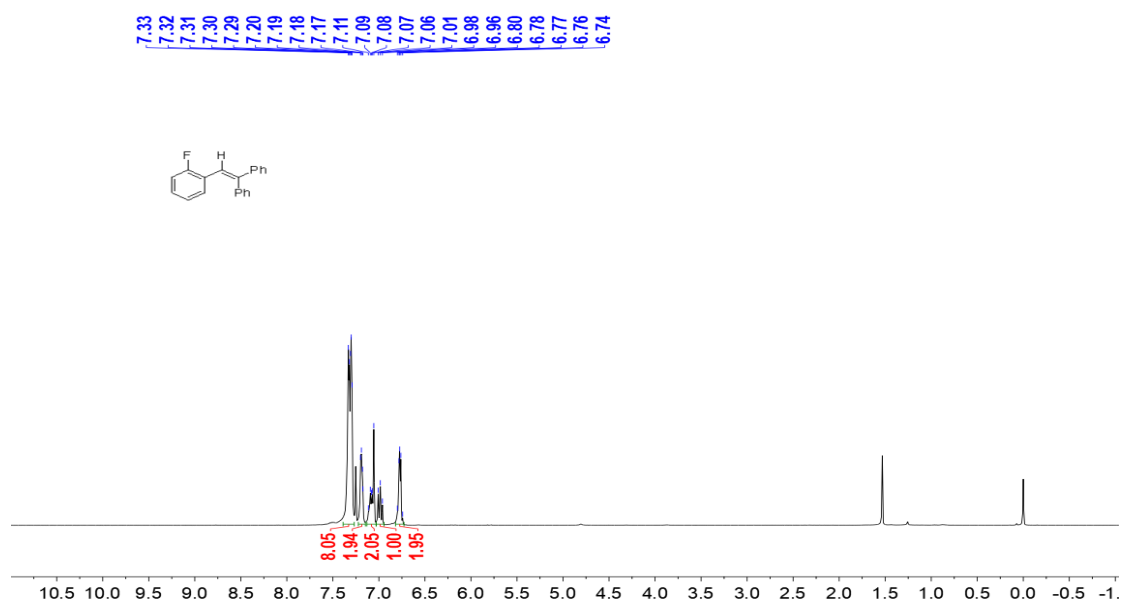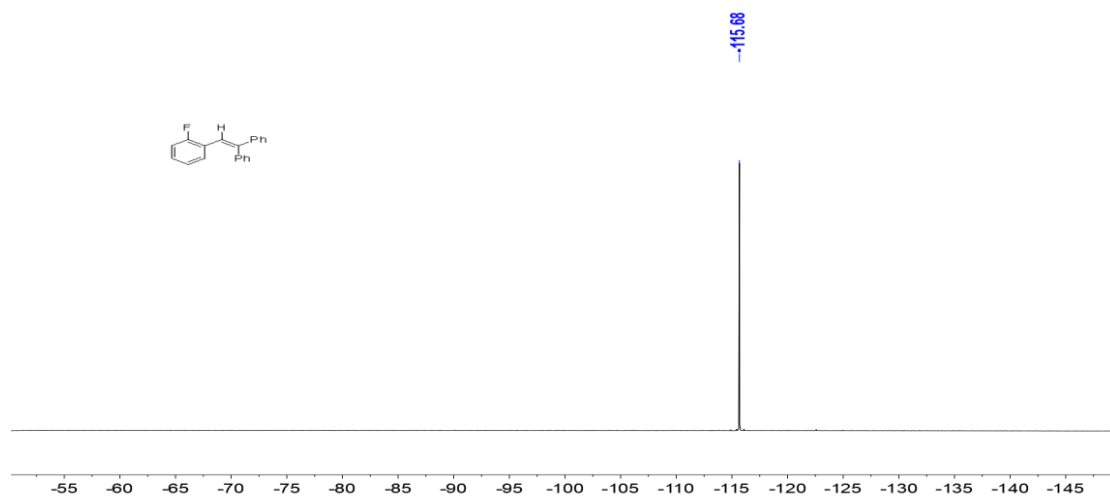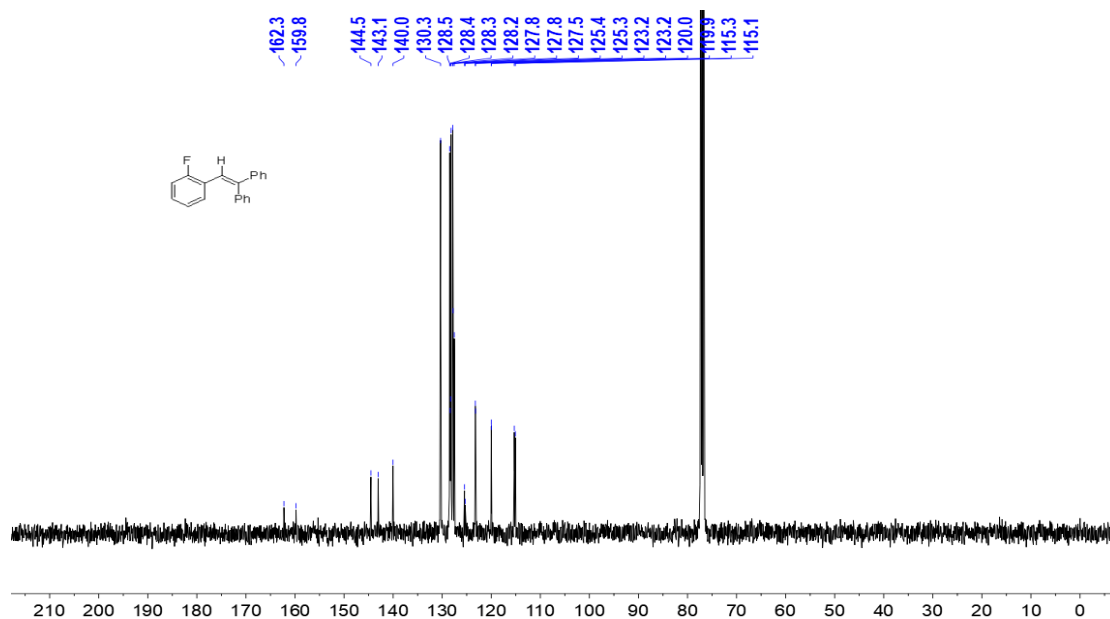

$^1\text{H}$  and  $^{13}\text{C}$  NMR spectra of compound **4j** in  $\text{CDCl}_3$  (400 MHz)

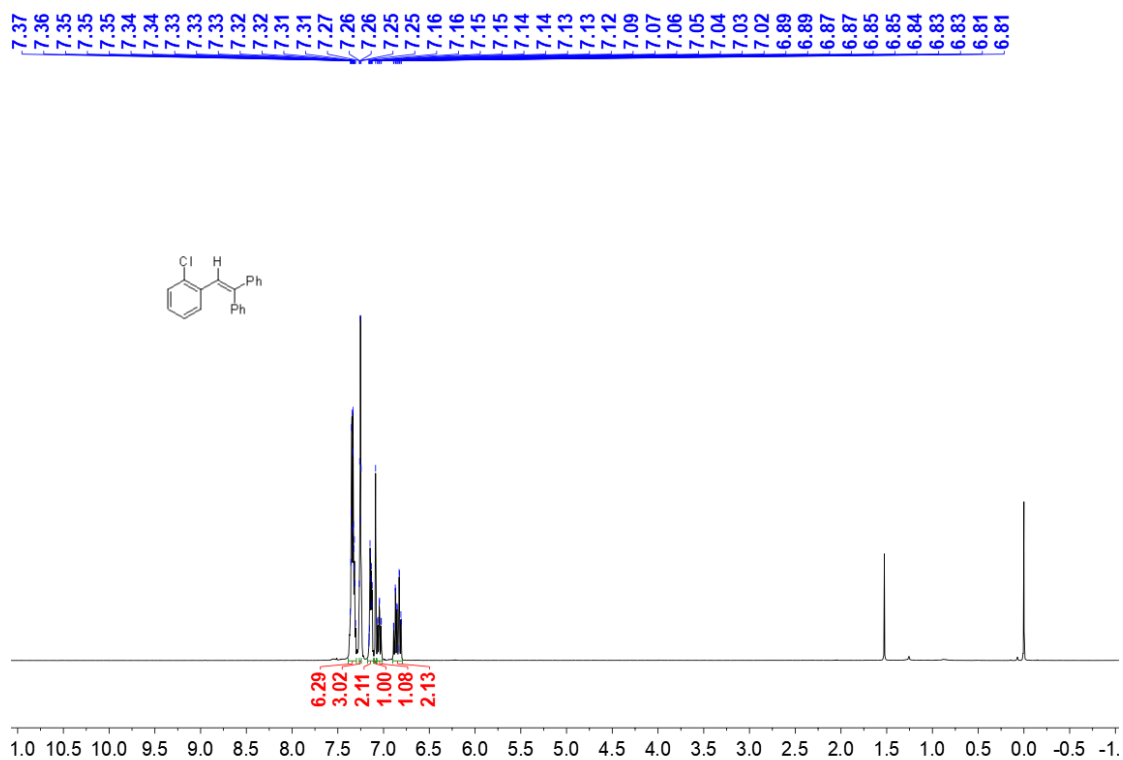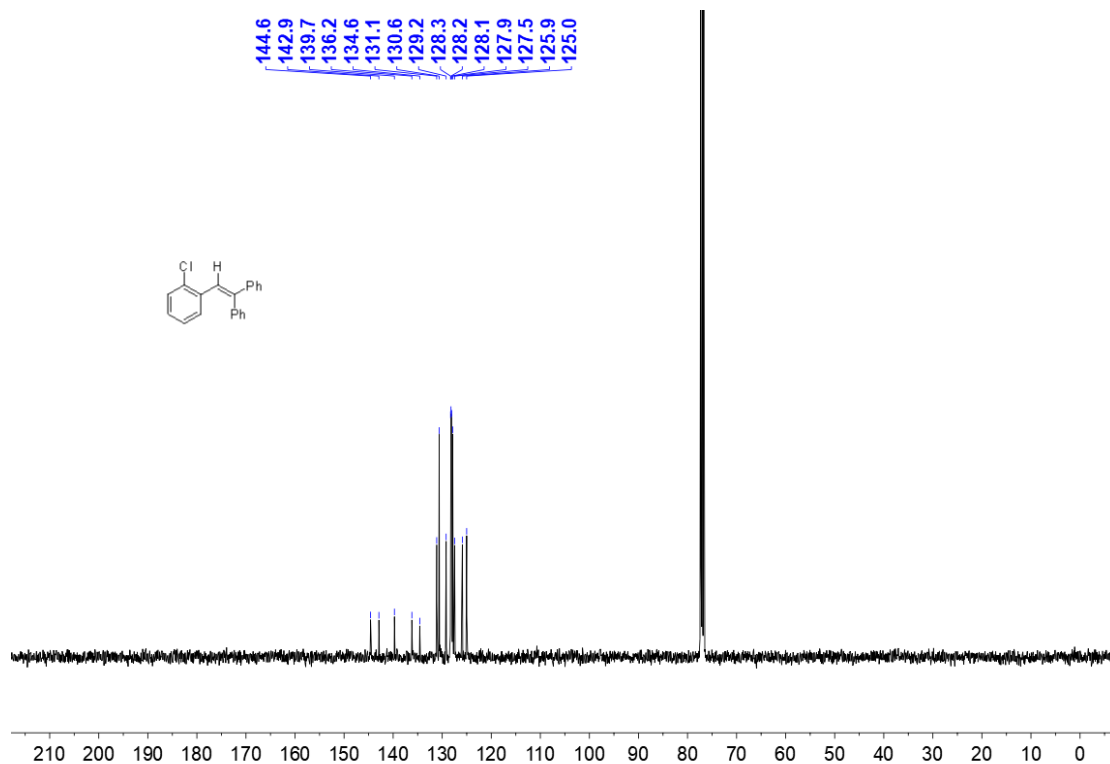



$^1\text{H}$  and  $^{13}\text{C}$  NMR spectra of compound **4k** in  $\text{CDCl}_3$  (400 MHz)

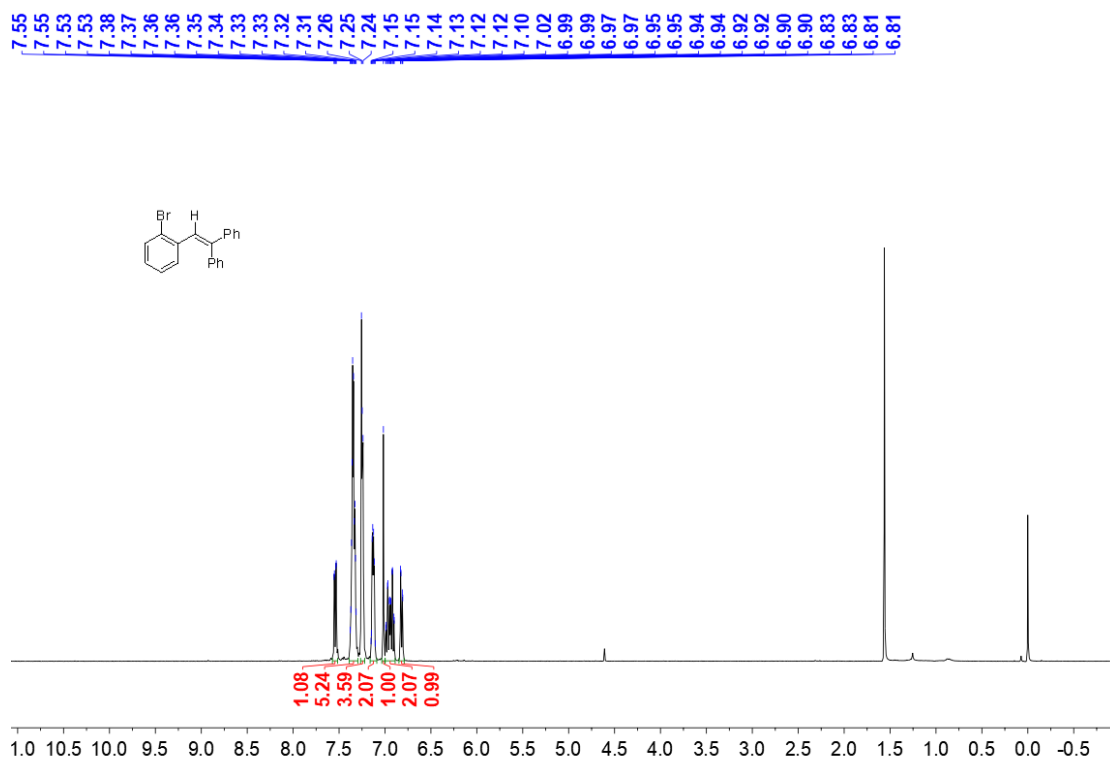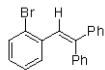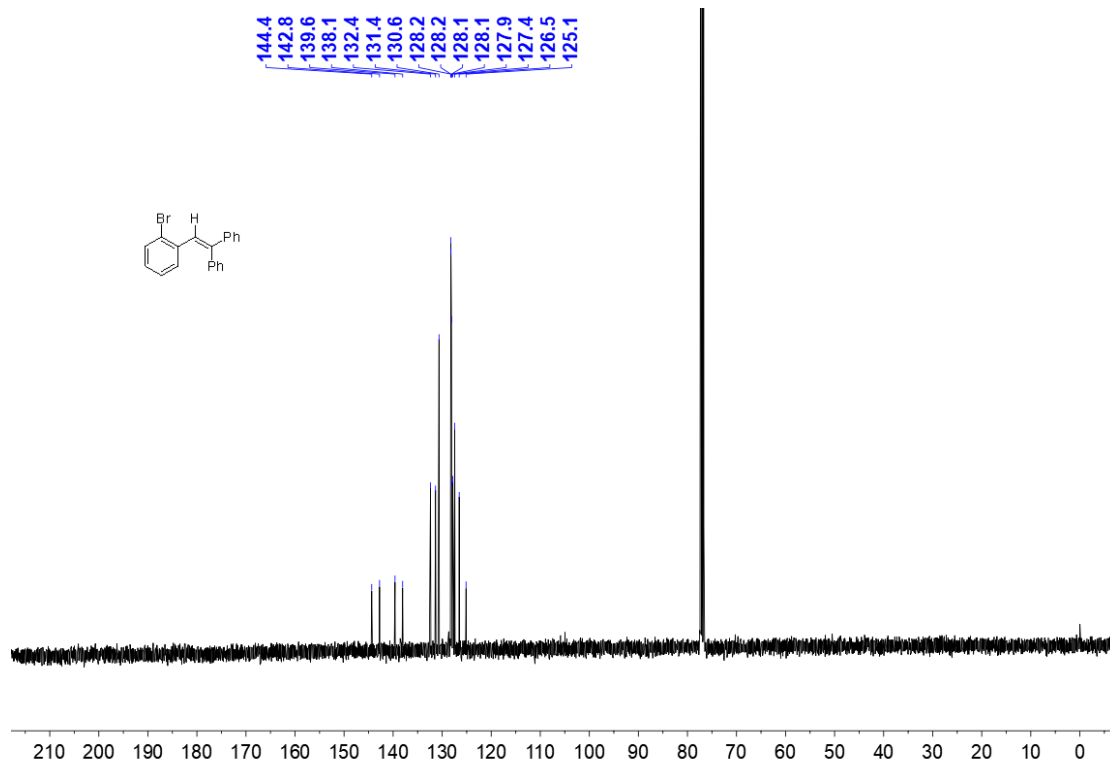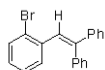

$^1\text{H}$  and  $^{13}\text{C}$  NMR spectra of compound **41** in  $\text{CDCl}_3$  (400 MHz)

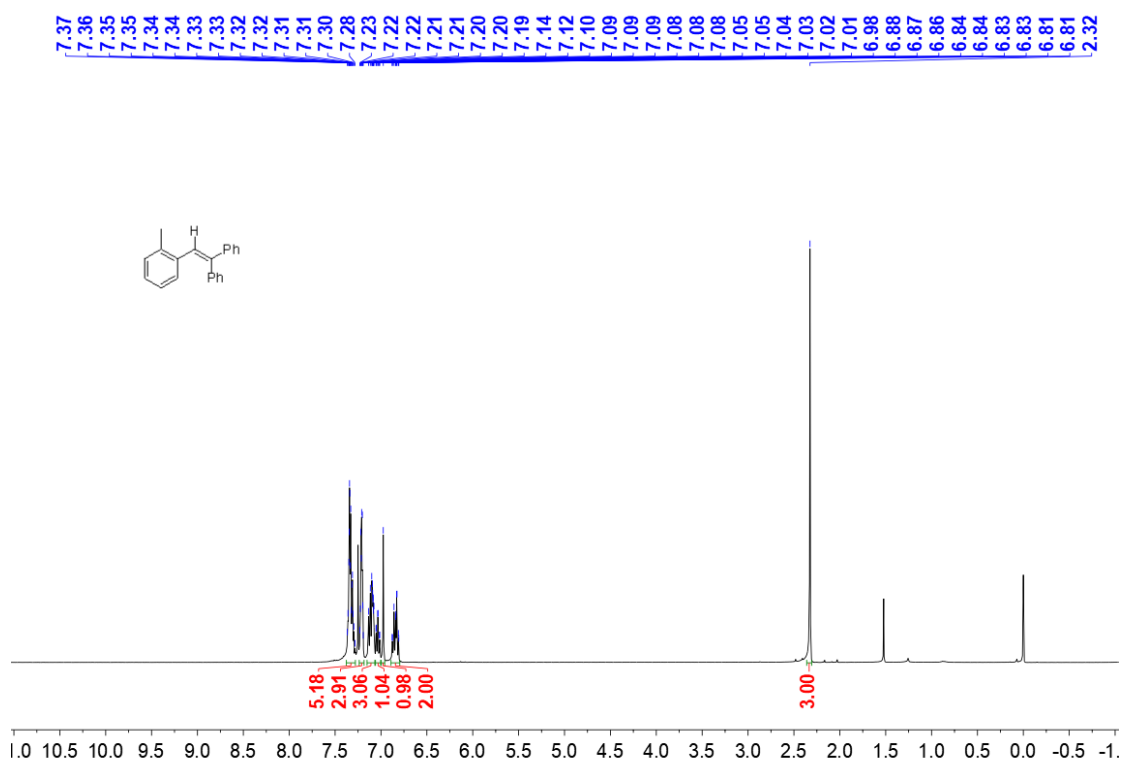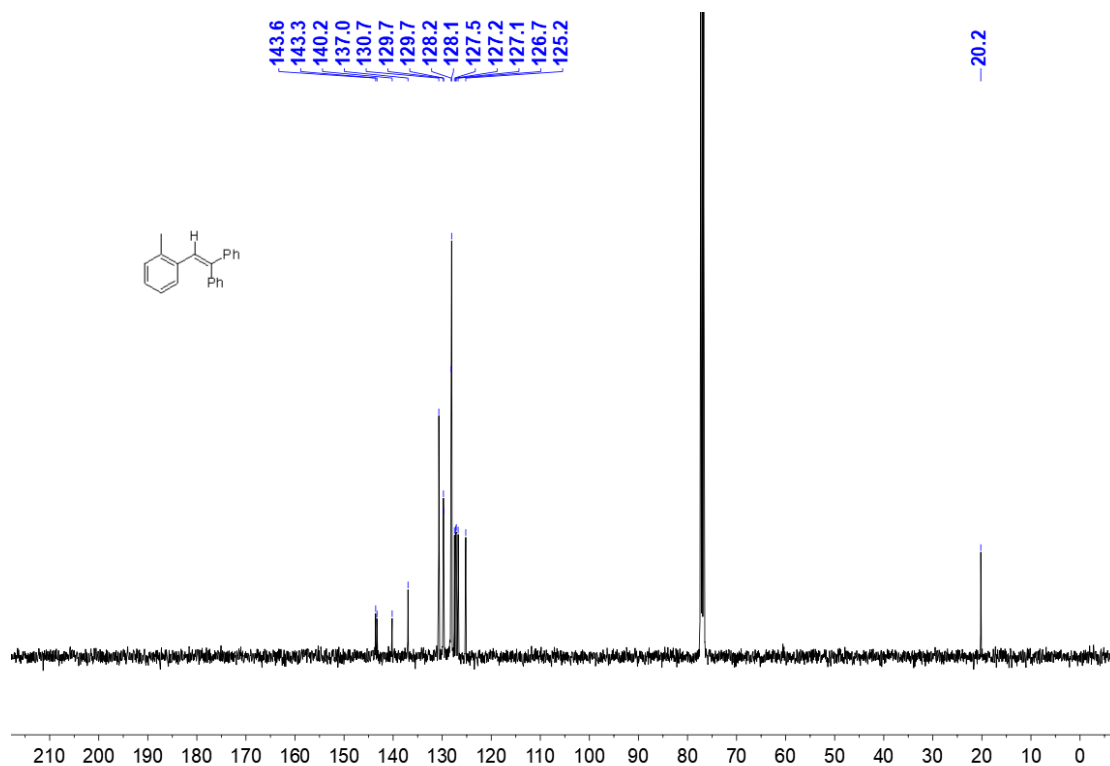

$^1\text{H}$  and  $^{13}\text{C}$  NMR spectra of compound **4m** in  $\text{CDCl}_3$  (400 MHz)

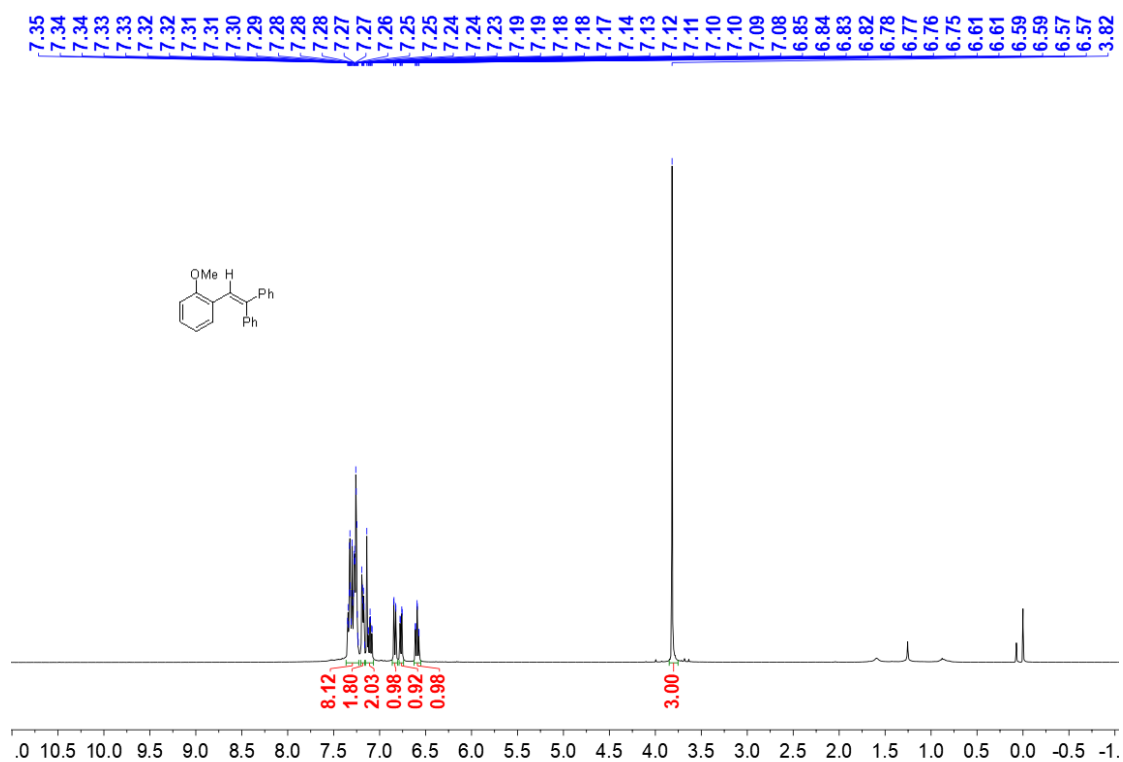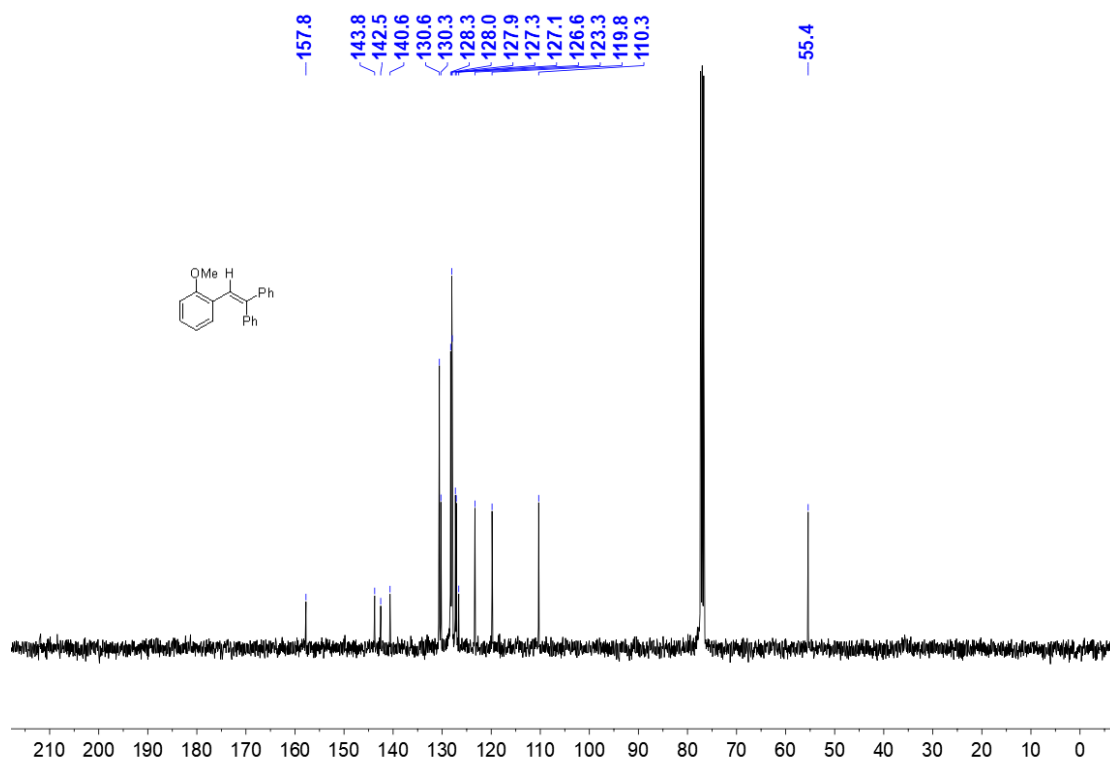

$^1\text{H}$  and  $^{13}\text{C}$  NMR spectra of compound **4n** in  $\text{CDCl}_3$  (400 MHz)

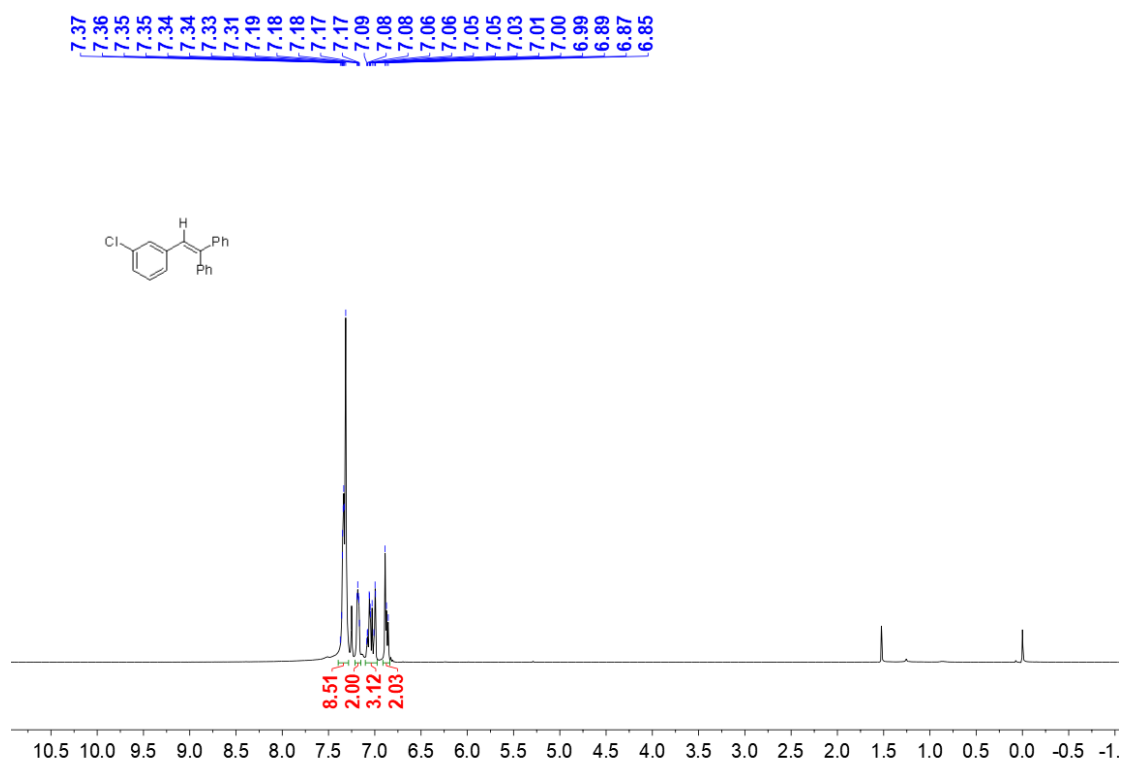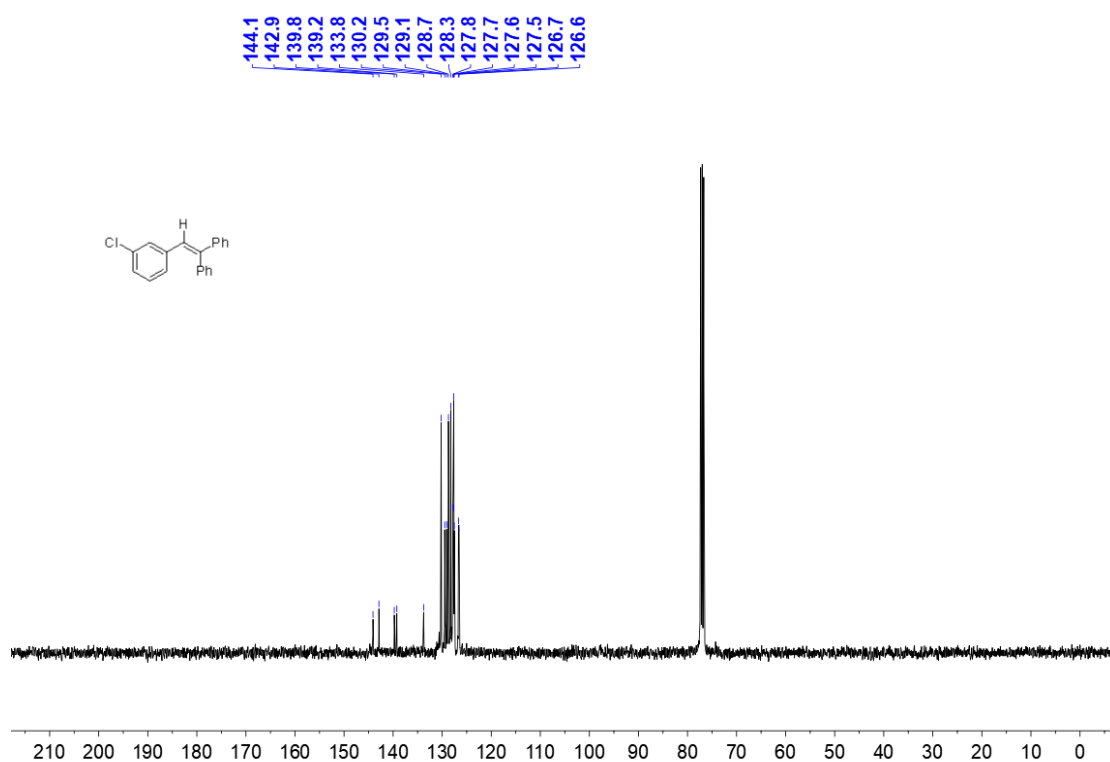

$^1\text{H}$  and  $^{13}\text{C}$  NMR spectra of compound **4o** in  $\text{CDCl}_3$  (400 MHz)

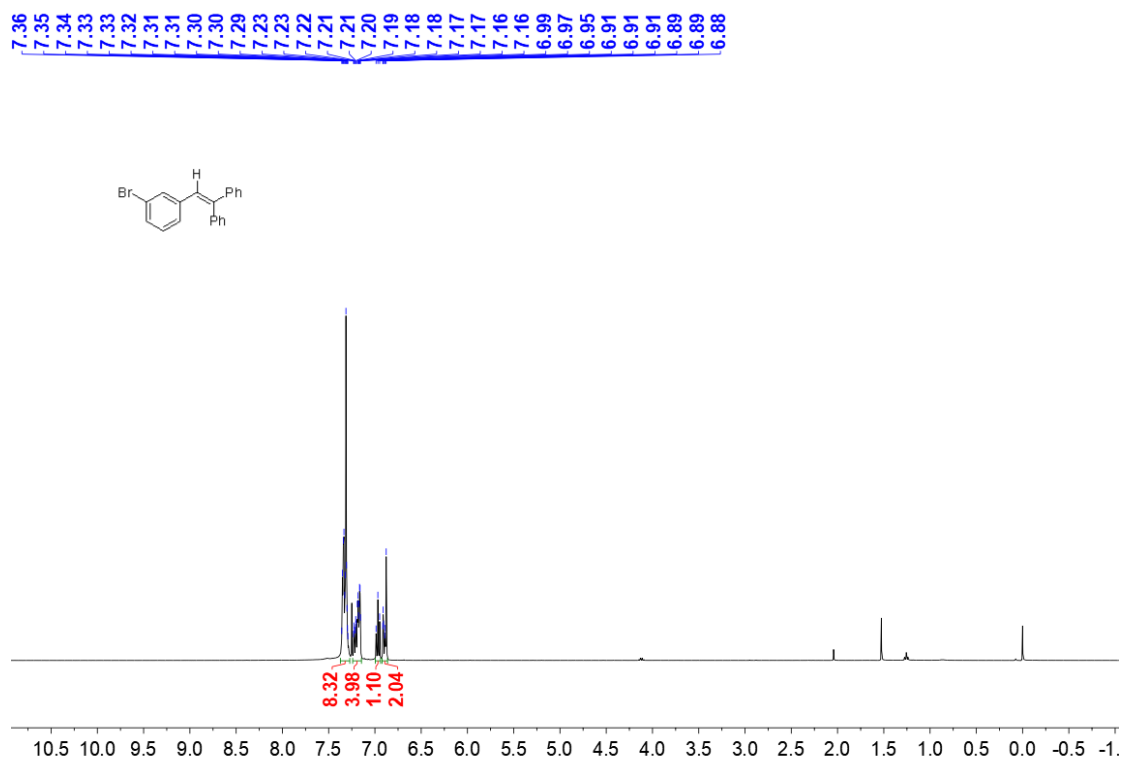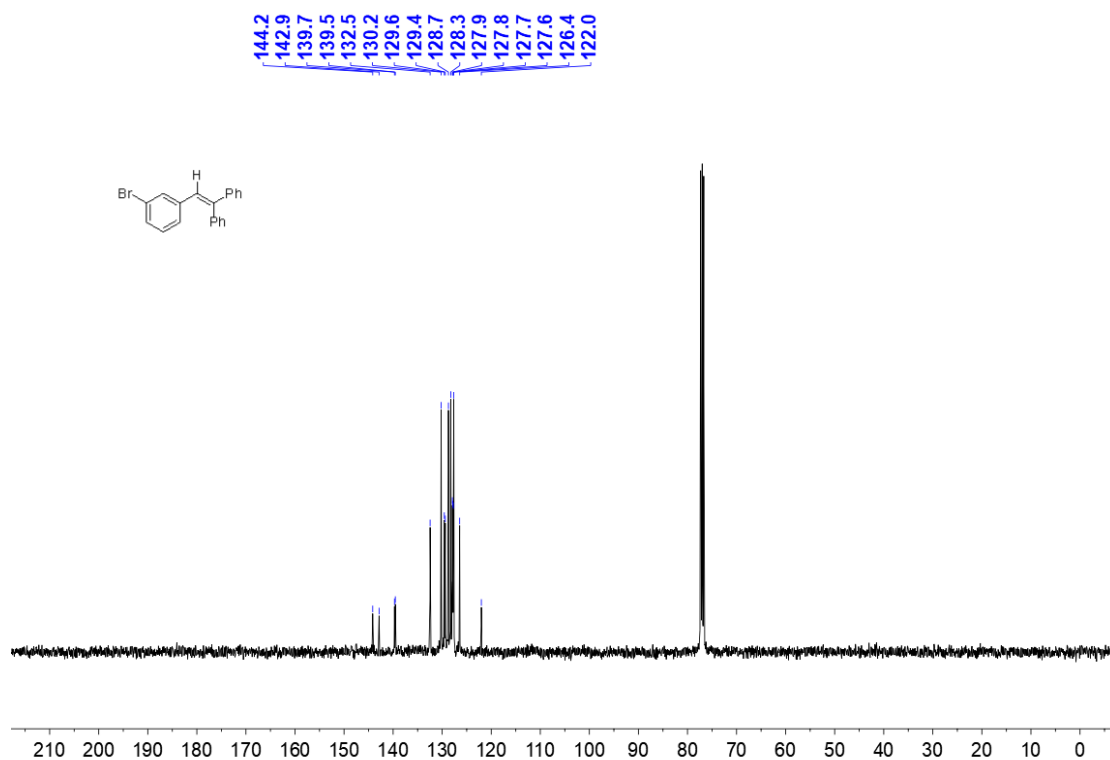

$^1\text{H}$  and  $^{13}\text{C}$  NMR spectra of compound **4p** in  $\text{CDCl}_3$  (400 MHz)

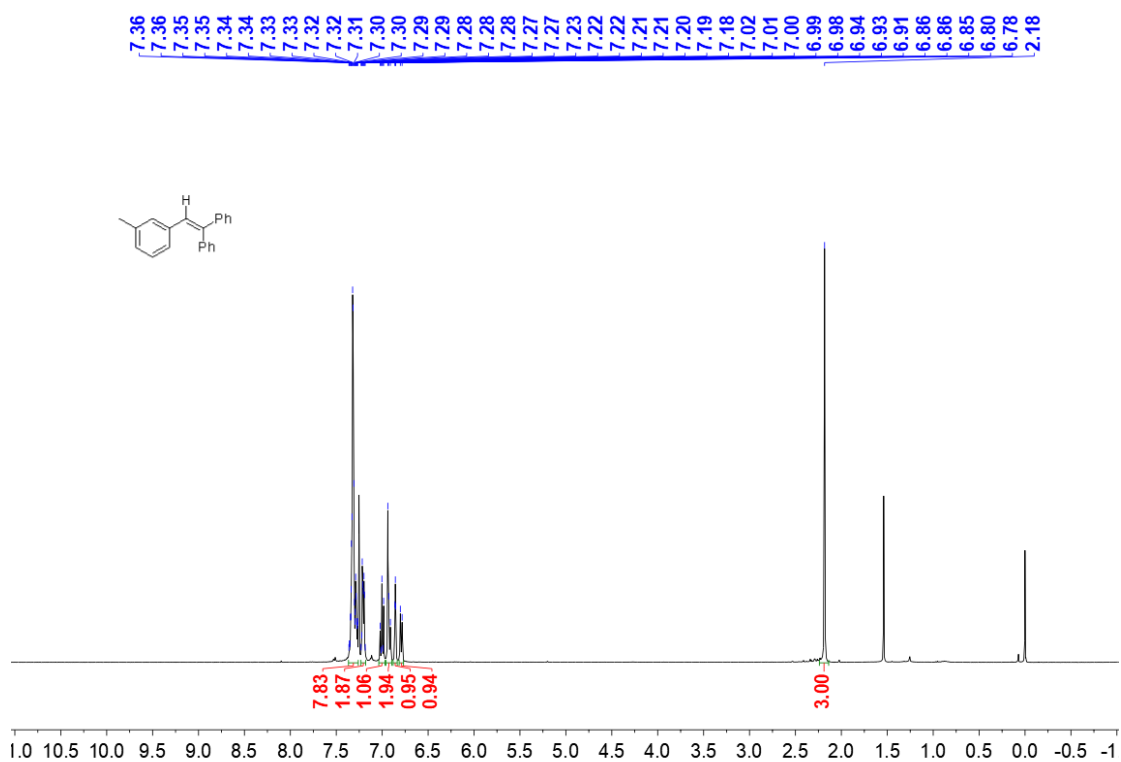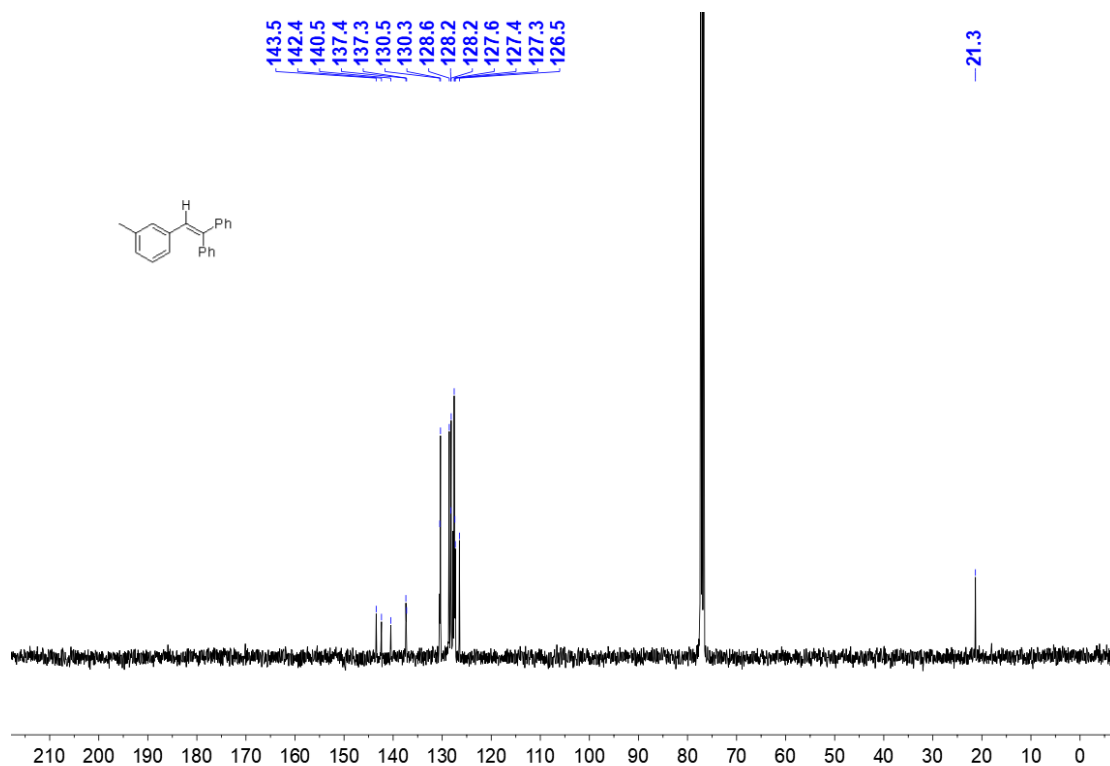

$^1\text{H}$  and  $^{13}\text{C}$  NMR spectra of compound **4q** in  $\text{CDCl}_3$  (400 MHz)

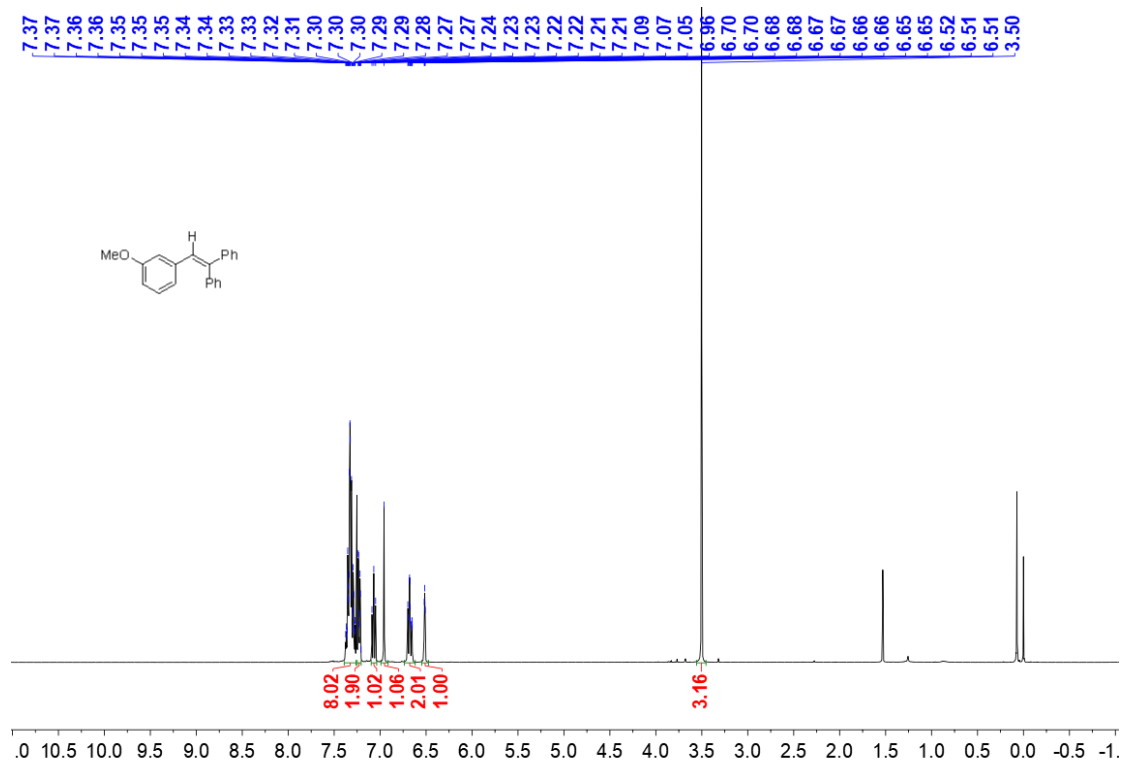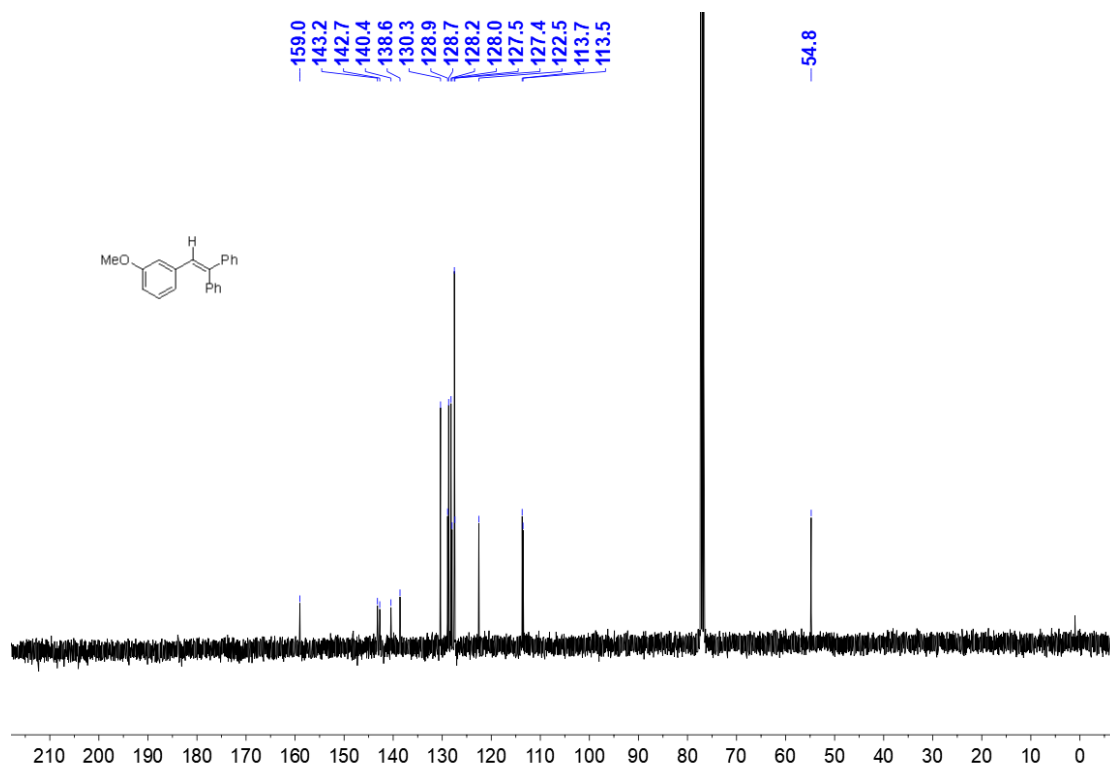

$^1\text{H}$  and  $^{13}\text{C}$  NMR spectra of compound **4r** in  $\text{CDCl}_3$  (400 MHz)

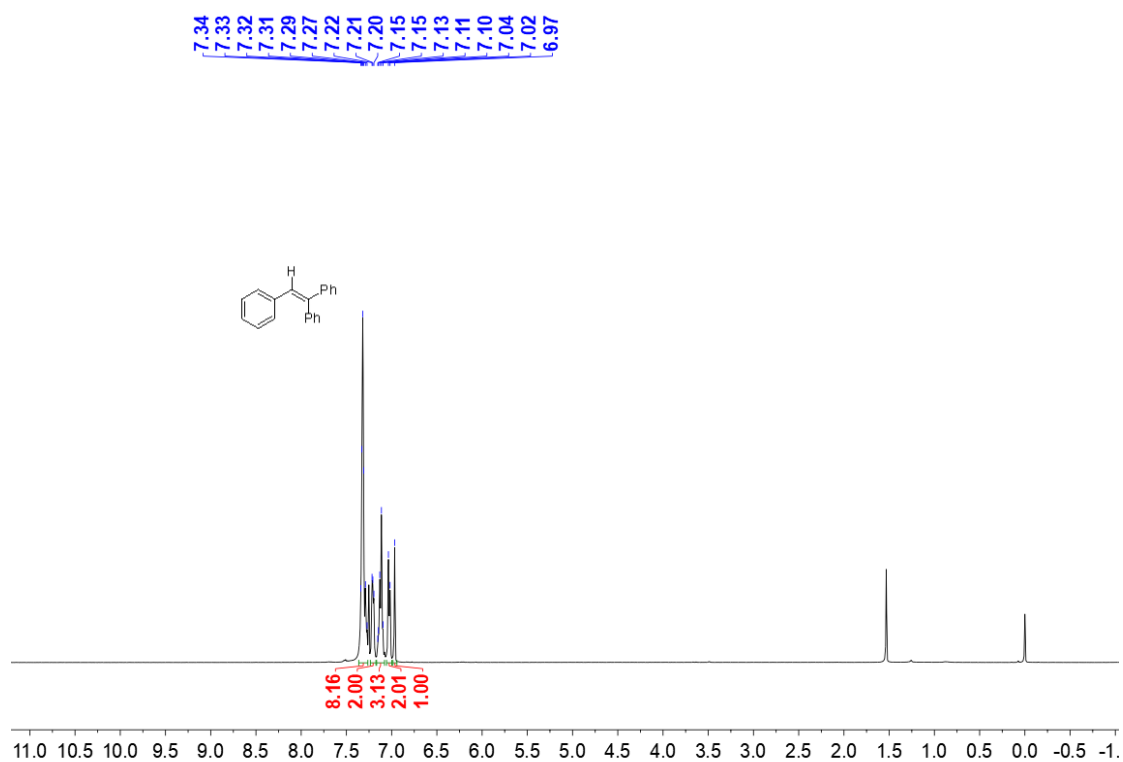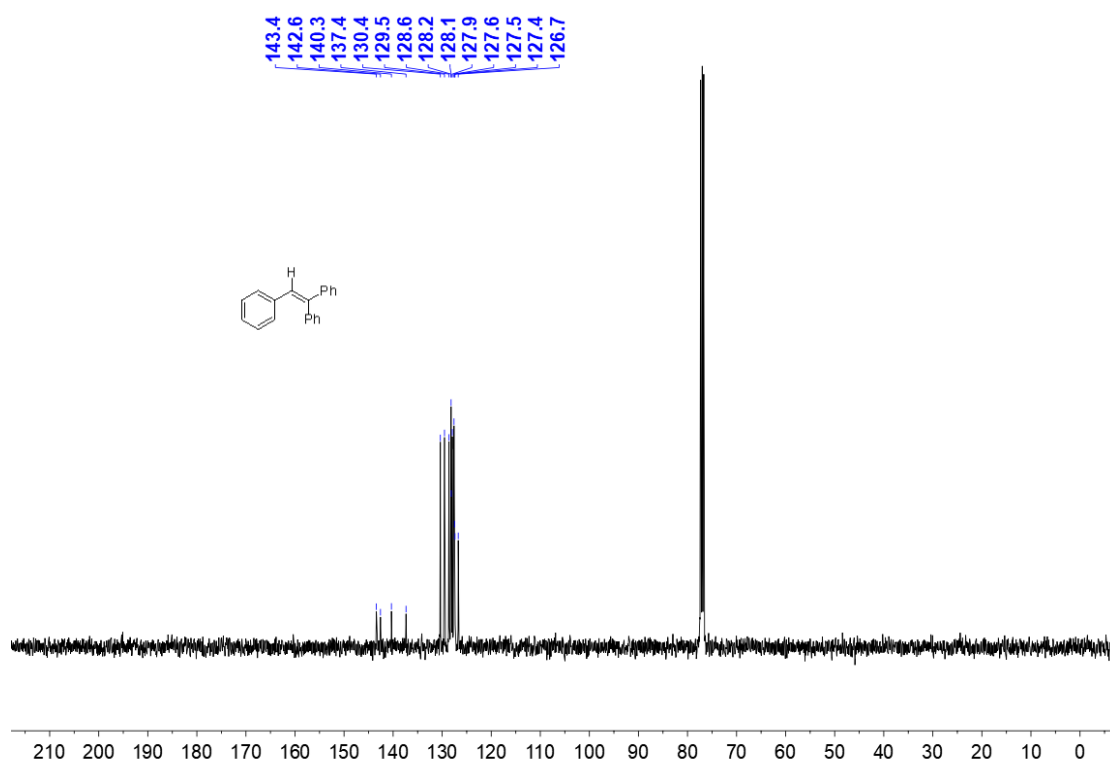



$^1\text{H}$  and  $^{13}\text{C}$  NMR spectra of compound **4s** in  $\text{CDCl}_3$  (400 MHz)

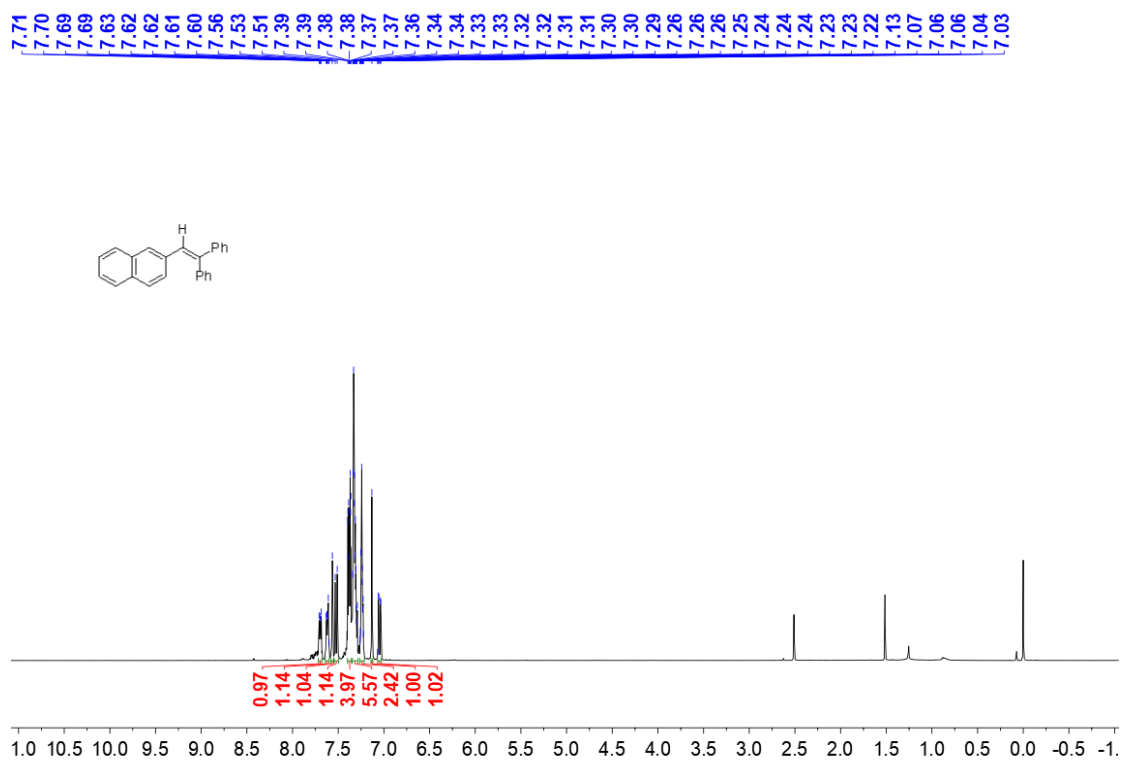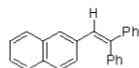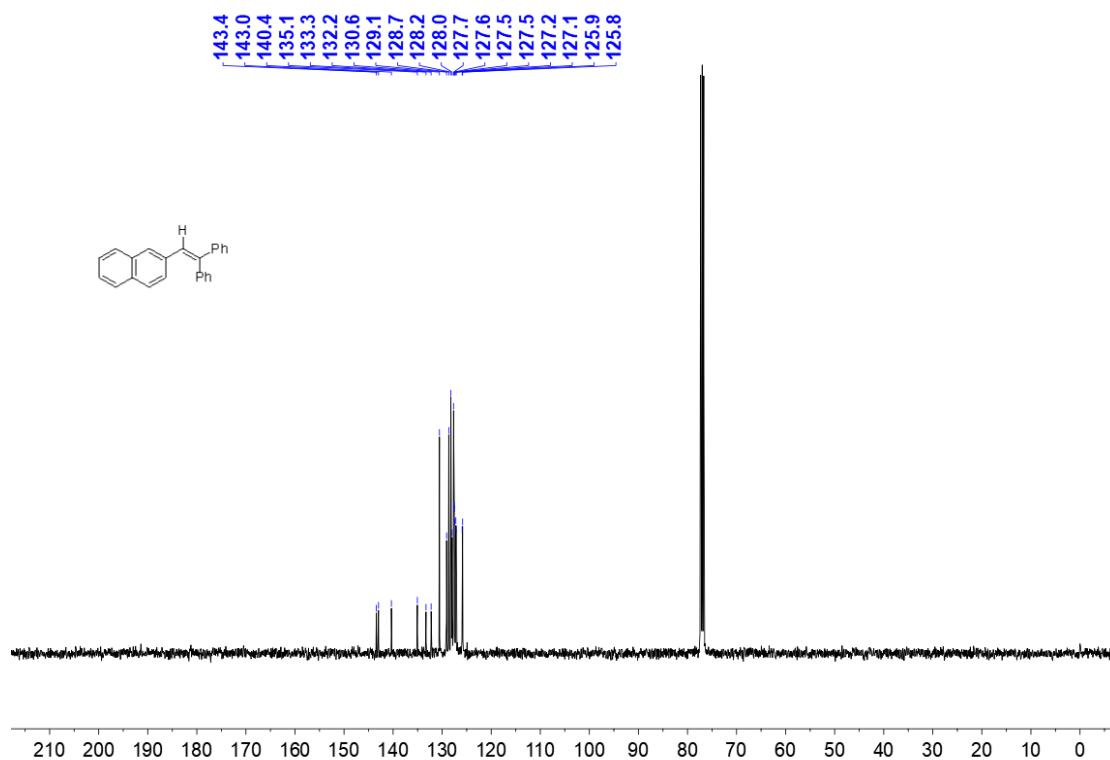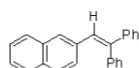

$^1\text{H}$  and  $^{13}\text{C}$  NMR spectra of compound **4t** in  $\text{CDCl}_3$  (400 MHz)

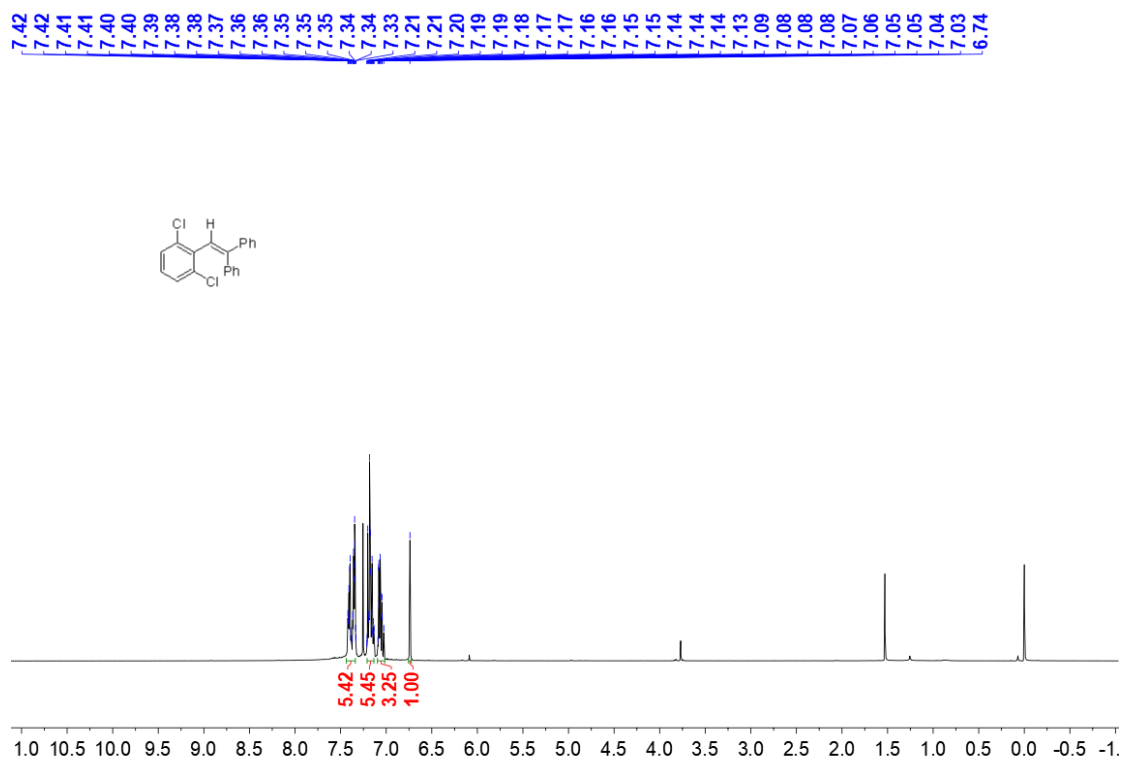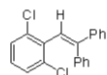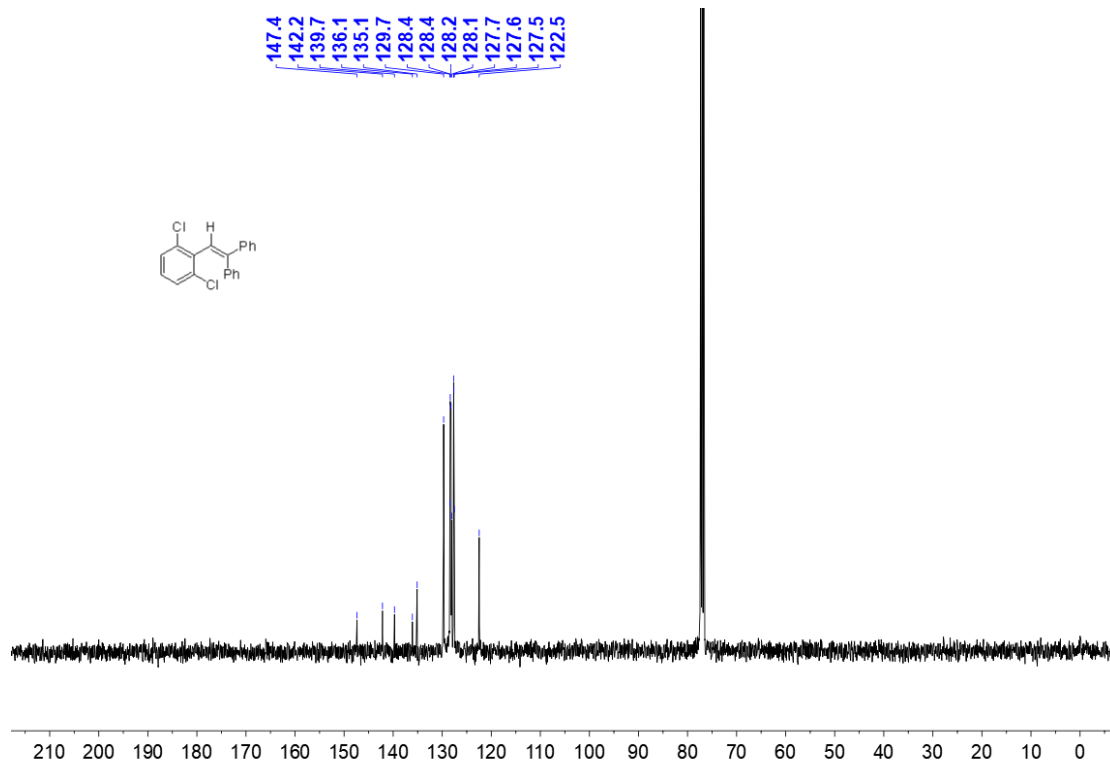

$^1\text{H}$  and  $^{13}\text{C}$  NMR spectra of compound **4u** in  $\text{CDCl}_3$  (400 MHz)

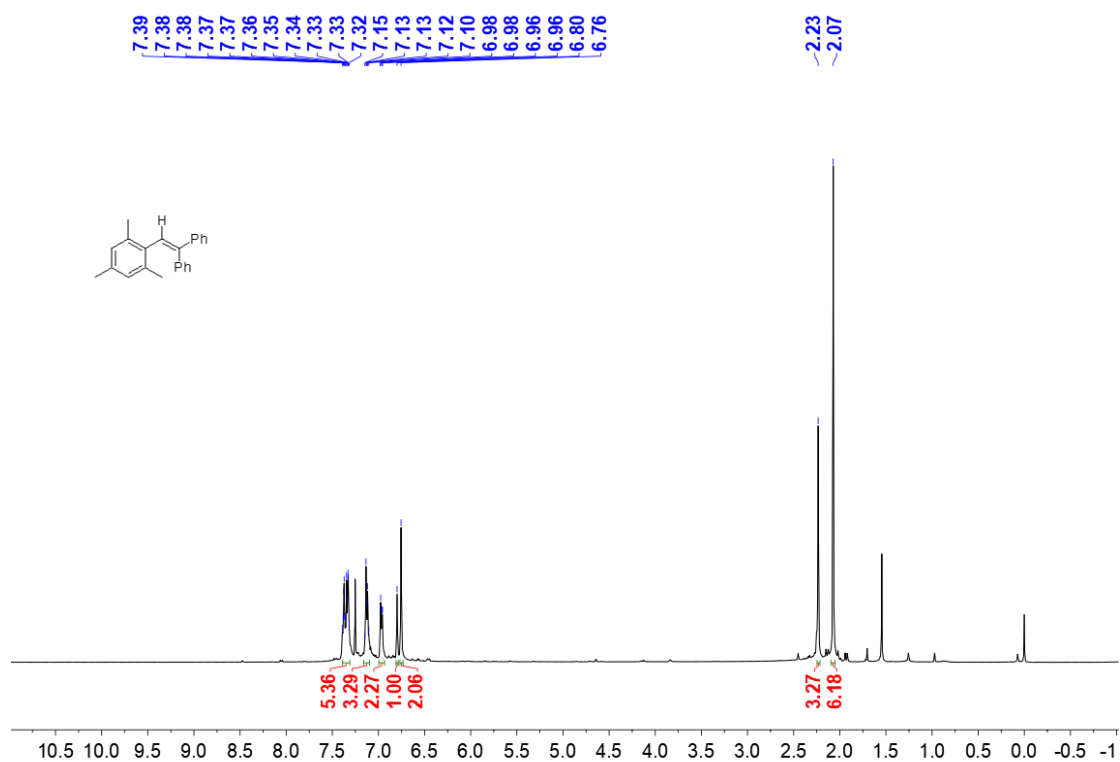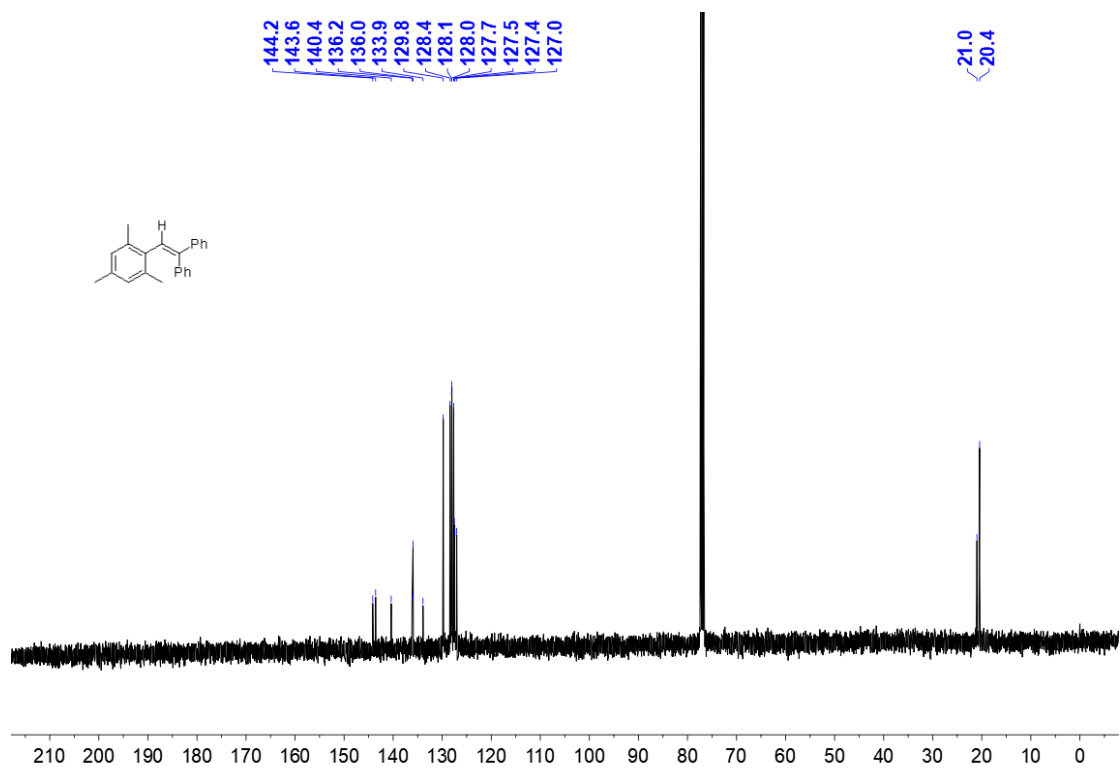

$^1\text{H}$  and  $^{13}\text{C}$  NMR spectra of compound **4v** in  $\text{CDCl}_3$  (400 MHz)

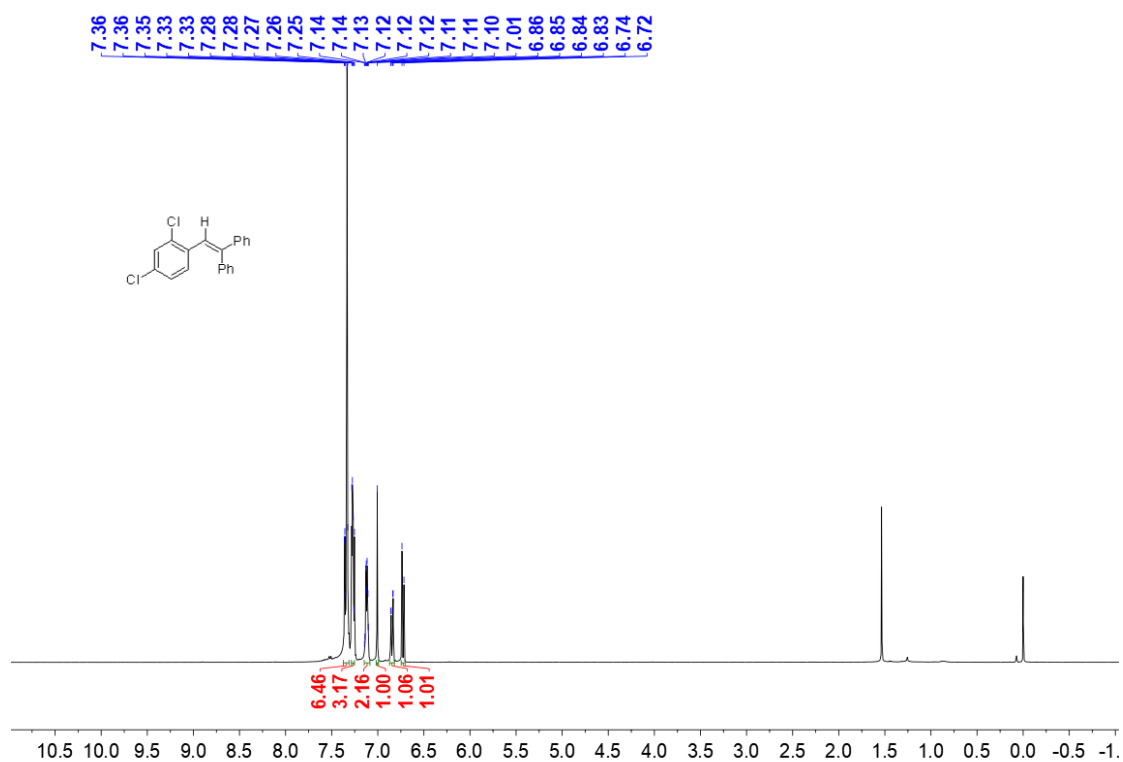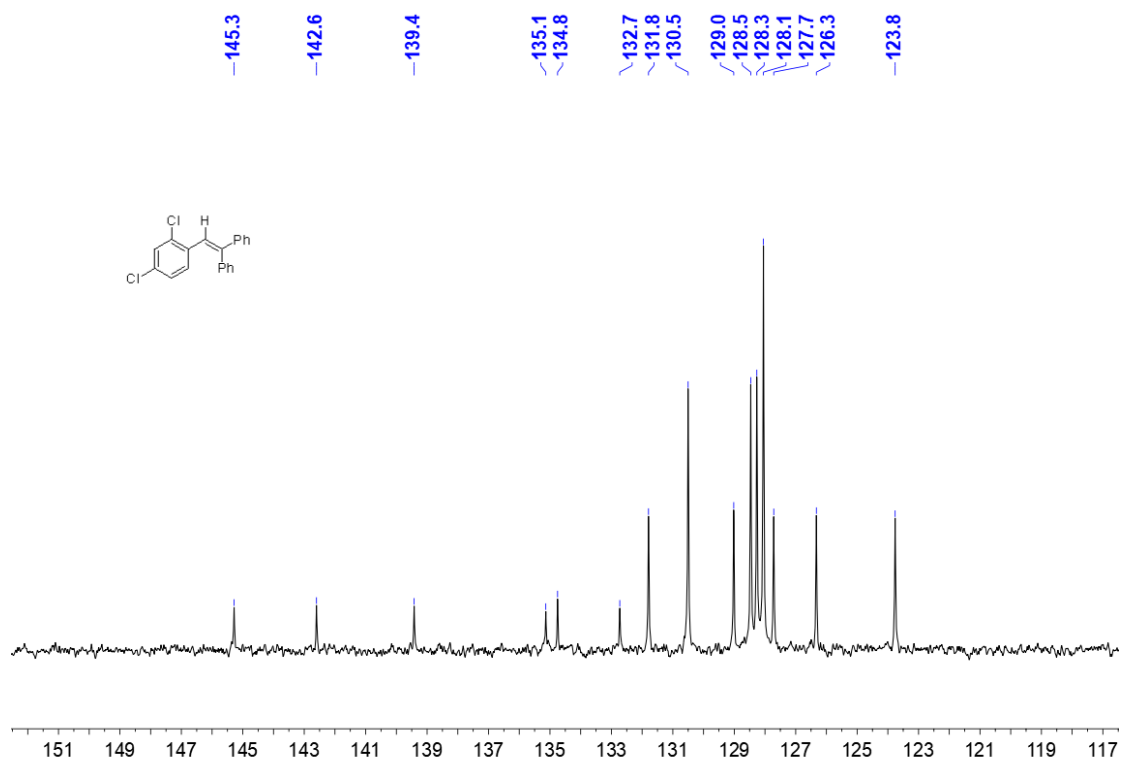

$^1\text{H}$  and  $^{13}\text{C}$  NMR spectra of compound **4x** in  $\text{CDCl}_3$  (400 MHz)

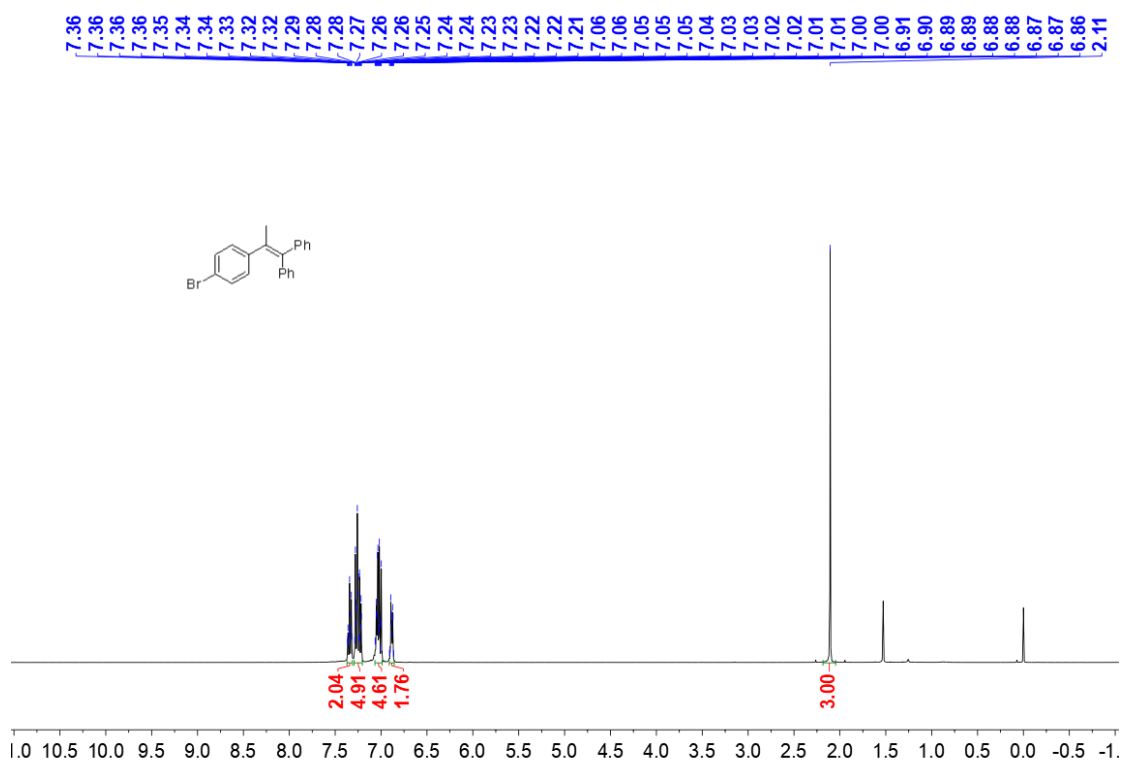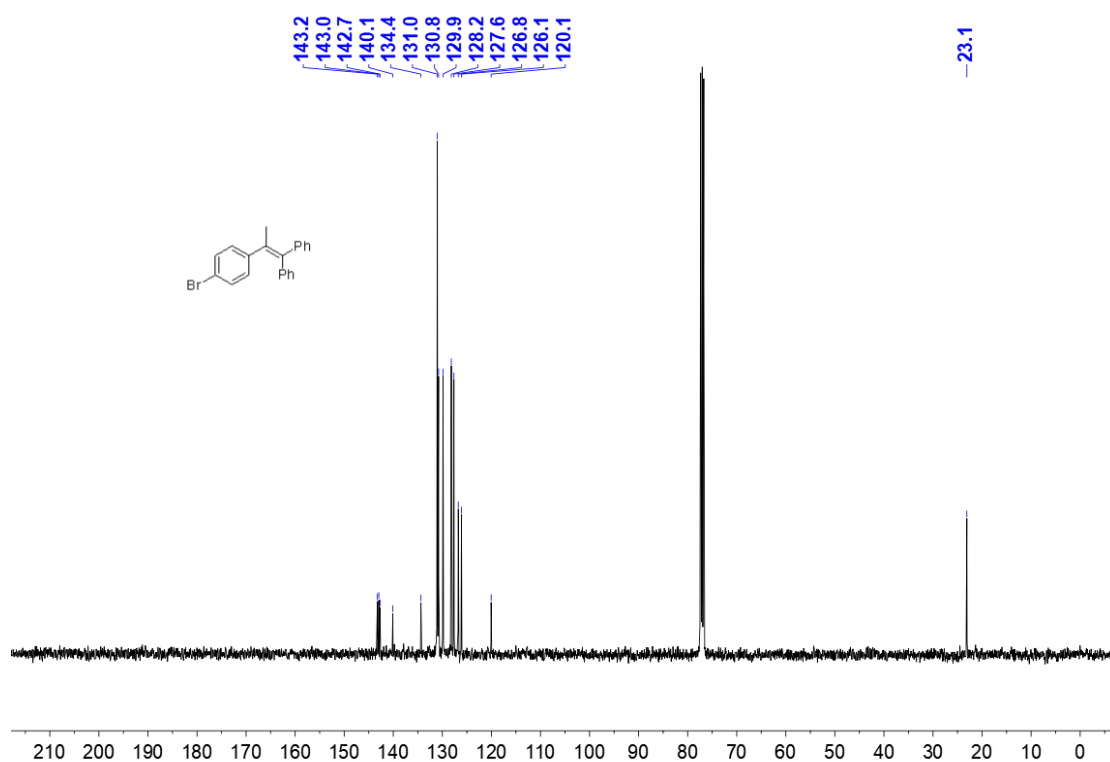

$^1\text{H}$  and  $^{13}\text{C}$  NMR spectra of compound **4aa** in  $\text{CDCl}_3$  (400 MHz)

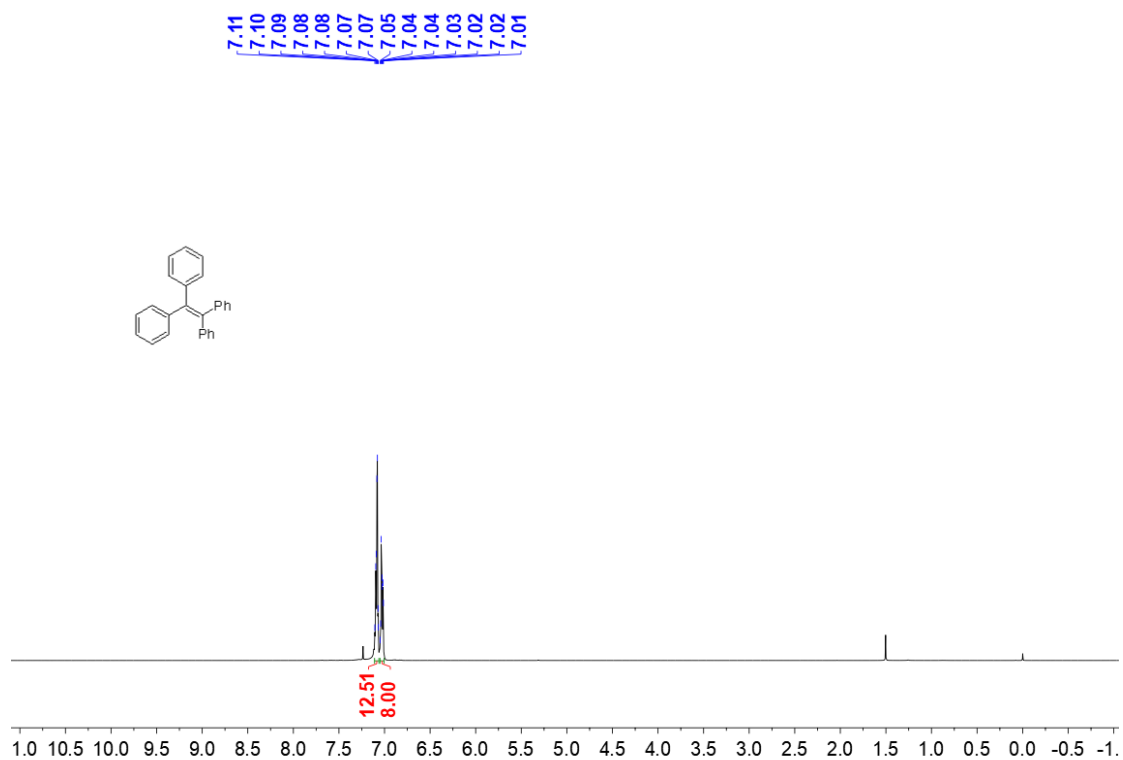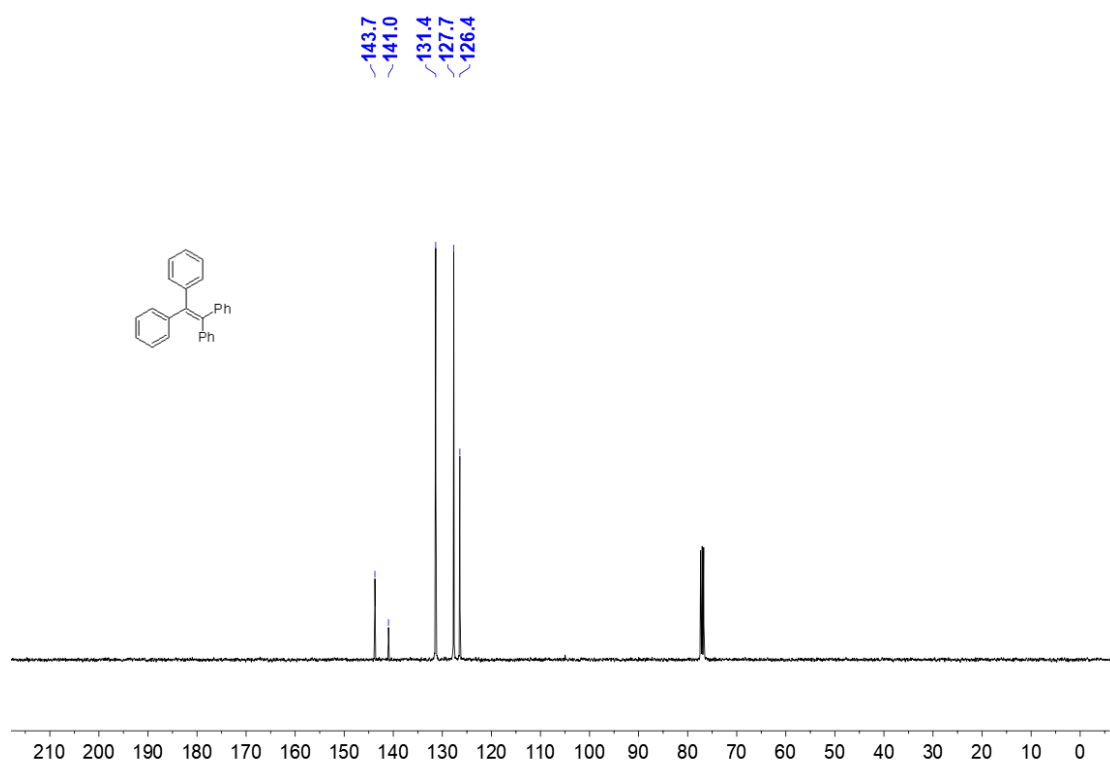

Supplement: d0ob02011g1.pdf [file d0ob02011g1.pdf]
